# Supplementary material for: Xenopus Meiotic Microtubule-Associated Interactome
Source: PLoS One. 2010 Feb 17;5(2):e9248. doi: 10.1371/journal.pone.0009248 (PMC2822853; doi:10.1371/journal.pone.0009248)
Supplement: Table S1 — Summary of identified proteins. ATP- and NaCl-elution fractions and combined list with 318 identifications. Different color code was used for such categories as: MAPs, Motors, Vesicular traffic, Signaling, Protein synthesis and folding, Protein degradation, Metabolism, Cytoskeletal proteins, Actin and intermediate filaments binding proteins, Centrosomal proteins, Cell cycle, RNA transcription/processing/structure, DNA replication/reparation/structure and Others. Column “A” indicates in which fraction was identified a given protein. Column “F” and “G” contain the names of Xenopus and human proteins respectively. Sheets 2, 3 and 4 contain the lists of proteins identified in the ATP, NaCl fractions and 2D gels, respectively. (0.41 MB XLS) [file pone.0009248.s009.xls]

## Sheet: Summary of all proteins
Fraction	Description	Identities	Species	UniProt Acc	Name	Human ortholog (gene symbol)	Localization	Class	Type
ATP	LOC443724 protein (Fragment)	Similar to AP-3 complex subunit beta-1 (>90% in XL)	Xenopus laevis	Q6DJL1	Beta3A-adaptin	AP3B1	Cytoplasm/Golgi	Vesicular traffic	Protein
ATP	LOC496052 protein	Similar to AP-3 complex subunit mu-2 (>90% in XL)	Xenopus laevis	Q5PPX3	AP-3 mu-2	AP3M2	Cytoplasm/Golgi	Vesicular traffic	Protein
ATP	RAB6-interacting protein 2		Homo sapiens	Q8IUD2	ERC1		Cytoplasm	Vesicular traffic	Protein
ATP	Exocyst complex component 7		Mus musculus	O35250	EXOC7	EXOC7	Cytoplasm	Vesicular traffic	Protein
ATP	Rabconnectin.		Homo sapiens	Q8TDJ6	RC3	NRGN	Cytoplasm	Vesicular traffic	Protein
ATP	MGC80624 protein	Similar to SEC10-like 1 (>90% in XL)	Xenopus laevis	Q6GP79	EXOC5	EXOC5	Cytoplasm	Vesicular traffic	Protein
ATP	Exoc1 protein		Mus musculus	Q5PPR2	EXOC1	EXOC1	Endoplasmic reticulum	Vesicular traffic	Protein
ATP	Sec6l1-prov protein		Xenopus tropicalis	Q6DJR6	EXOC3	EXOC3	Endoplasmic reticulum	Vesicular traffic	Protein
ATP	VAT1 protein (Fragment)		Xenopus tropicalis	Q66KE1	VAT1	VAT1	Plasma membrane	Vesicular traffic	Protein
NaCl/ATP	Dynamin-1-like protein		Xenopus laevis	Q7ZWZ9	dynamin 1-like	DNM1L	Cytoplasm/Golgi	Vesicular traffic	Protein
ATP	MGC83635 protein	Similar to Par-3 homologue (64% identity with HS)	Xenopus laevis	Q6GN19	PAR3	PARD3		Signalling	Protein
ATP	MGC80878 protein	Similar to G protein-coupled receptor kinase interactor 2 (>90% in XT)	Xenopus laevis	49116662*	GIT2	GIT2	Cytoplasm	Signalling	Protein
ATP	MGC83937 protein	Similar to SLIT-ROBO Rho GTPase activating protein 2 (73% in H)	Xenopus laevis	51950048*	srGAP2	SRGAP2	Cytoplasm	Signalling	Protein
ATP	Phosphatidylinositol 3-kinase catalytic subunit type 3		Xenopus laevis	Q6AZN6	PI3-K type 3	PIK3C3	Cytoplasm	Signalling	Protein
ATP	BetaPix-bL		Mus musculus	Q6XPA5	Beta-Pix	ARHGEF7	Cytoplasm	Signalling	Protein
ATP	Calcium/calmodulin-dependent protein kinase II gamma K subunit		Xenopus laevis	Q9DG00	CAMK2Gk	CAMK2G	Cytoplasm	Signalling	Protein
ATP	Calcium/calmodulin-dependent protein kinase II gamma J subunit		Xenopus laevis	Q9DG01	CAMK2Gj	CAMK2G	Cytoplasm	Signalling	Protein
ATP	Calcium/calmodulin-dependent protein kinase II gamma M subunit		Xenopus laevis	Q9DFZ8	CAMK2Gm	CAMK2G	Cytoplasm	Signalling	Protein
ATP	Citron Rho-interacting kinase		Mus musculus	P49025	Citron-K	CIT	Cytoplasm	Signalling	Protein
ATP	Casein kinase I isoform alpha [Fragment]		pig	O19175	CKI-alpha	CSNK1A1	Cytoplasm	Signalling	Protein
ATP	Hypothetical protein	Similar to Engulfment and cell motility protein 1 (>90% in H)	Gallus gallus	Q5ZL97	Elmo1	ELMO1	Cytoplasm	Signalling	Protein
ATP	P95-APP1		Gallus gallus	Q9DG15	GIT1	GIT1	Cytoplasm	Signalling	Protein
ATP	Guanine nucleotide-binding protein beta subunit 2-like 1		Xenopus laevis	Q8AVP6	RACK1	GNB2L1	Cytoplasm/plasma membrane	Signalling	Protein
ATP	Serine/threonine-protein kinase TAO3		Xenopus laevis	Q6DD27	JIK	TAOK3	Cytoplasm	Signalling	Protein
ATP	Karyopherin alpha 2		Xenopus laevis	Q7ZYI0	Importin alpha2	KPNA2	Nucleus	Signalling	Protein
ATP	Myosin phosphatase Rho-interacting protein		Mus musculus	P97434	M-RIP	M-RIP	Cytoplasm	Signalling	Protein
ATP	LOC496015 protein	Similar to Myotubularin-related protein 9 (>80% in H)	Xenopus laevis	Q5PQ14	MTMR9	MTMR9	Cytoplasm	Signalling	Protein
ATP	neurofibromatosis-related protein NF1		Mus musculus	Q5SYI1	Neurofibromin	NF1	Cytoplasm	Signalling	Protein
ATP	Protein phosphatase 1 regulatory subunit 12A		Homo sapiens	O14974	PPP1R12A		Cytoplasm	Signalling	Protein
ATP	X-linked retinitis pigmentosa GTPase regulator-interacting protein 1		Mus musculus	Q9EPQ2	RPGRIP1	RPGRIP1	Cytoplasm	Signalling	Protein
ATP	Shoc2-prov protein		Xenopus laevis	Q8AVI4	SHOC2	SHOC2	Cytoplasm	Signalling	Protein
ATP	Serine/threonine-protein kinase TAO2		Xenopus laevis	Q6GPK9	TAO2	TAOK2	Cytoplasm	Signalling	Protein
ATP	14-3-3 protein beta/alpha-B		Xenopus laevis	Q8AVQ3	14-3-3 beta	YWHAB	Cytoplasm	Signalling	Protein
ATP	Protein kinase C lambda.		Xenopus tropicalis	Q5EGD6	PKC iota	PRKCI	Nucleus/Cytoplasm	Signalling	Protein
ATP	GCN1-like protein 1 (HsGCN1)		Homo sapiens	Q92616	GCN1L1		Nucleus/Cytoplasm	Signalling	Protein
NaCl	Calcium/calmodulin-dependent protein kinase II delta12 subunit		Xenopus laevis	Q9DG02	CAMK2 delta12	CAMK2D	Cytoplasm	Signalling	Protein
NaCl	calgranulin A		Homo sapiens	P05109	S100A8		Extracellular	Signalling	Protein
NaCl	calgranulin B		Homo sapiens	P06702	S100A9		Extracellular	Signalling	Protein
NaCl	LOC443633 protein (Fragment)	Similar to TRAF2 and NCK interacting kinase (>90% in XL)	Xenopus laevis	Q6GP94	TNIK	TNIK	Cytoplasm	Signalling	Protein
NaCl/ATP	MGC81192 protein	Similar to Misshapen/NIK-related kinase MINK-1 (79% in H)	Xenopus laevis	Q6DDZ8	MINK1	MINK1	Cytoplasm	Signalling	Protein
NaCl/ATP	MGC81268 protein	Similar to G protein-coupled receptor kinase interactor 2 (>90% in XL)	Xenopus laevis	Q6DFK7	G3BP-2	G3BP2	Nucleus/Cytoplasm	Signalling	Protein
NaCl/ATP	Importin beta subunit (Karyopherin beta subunit) (P97) (Importin 90) (Fragments)		Xenopus laevis	P52297	Importin beta	KPNB1	Nucleus	Signalling	Protein
NaCl/ATP	Protein phosphatase 1, catalytic subunit, beta isoform		Xenopus laevis	Q5I085	PPP1CB	PPP1CB	Nucleus/Cytoplasm	Signalling	Protein
NaCl/ATP	MGC83886 protein	Similar to Wiskott-Aldrich syndrome-like [wasl] (>80% in XL)	Xenopus laevis	Q6NRE3	N-WASP	WASL	Nucleus/Cytoplasm	Signalling	Protein
ATP	Hypothetical protein	Similar to Splicing factor, arginine/serine-rich 15 (89% in H)	Mus musculus	Q8BXA9	SFRS15	SFRS15	Nucleus	RNA transcription/processing/structure	Protein
ATP	LOC495409 protein (Fragment)	Similar to Integrator complex subunit 3 (73% in H)	Xenopus laevis	Q5U4Z5	INTS3	INTS3	Nucleus	RNA transcription/processing/structure	Protein
ATP	Cnot10-prov protein		Xenopus laevis	Q6DE97	CNOT10	CNOT10	Nucleus	RNA transcription/processing/structure	Protein
ATP	MGC68685 protein	Similar to CRSP complex subunit 3 (>90% in XL)	Xenopus laevis	Q6P423	CRSP3	MED23	Nucleus/Cytoplasm	RNA transcription/processing/structure	Protein
ATP	DEAH (Asp-Glu-Ala-His) box polypeptide 38		Mus musculus	Q80X98	Ddx38	DHX38	Nucleus	RNA transcription/processing/structure	Protein
ATP	MGC84691 protein	Similar to Fusion (Involved in t(12;16) in malignant liposarcoma) (>90% in XL)	Xenopus laevis	Q6DKB4	Oncogene FUS	FUS	Nucleus	RNA transcription/processing/structure	Protein
ATP	Piwi-like protein 2		Homo sapiens	Q96SW6	PIWIL2		Cytoplasm	RNA transcription/processing/structure	Protein
ATP	Phosphatidylinositol 3-kinase-related protein kinase.		Homo sapiens	Q96Q15	SMG1		Cytoplasm	RNA transcription/processing/structure	Protein
ATP	Negative elongation factor C/D		Homo sapiens	Q8IXH7	NELF-C/D	TH1L	Nucleus/Cytoplasm	RNA transcription/processing/structure	Protein
ATP	THO complex 3		Brachydanio rerio	Q6AXK9	Tho3	THOC3	Nucleus	RNA transcription/processing/structure	Protein
ATP	Regulator of nonsense transcripts 2		Homo sapiens	Q9HAU5	hUpf2	UPF2	Nucleus/Cytoplasm	RNA transcription/processing/structure	Protein
ATP	Cytoplasmic RNA-binding protein p56 (Y-box binding protein-2a) (mRNP4)		Xenopus laevis	P21574	mRNP4	YBX2	Cytoplasm	RNA transcription/processing/structure	Protein
ATP	unnamed protein product	Similar to CCR4-NOT transcription complex, subunit 1 isoform a (>90%in H)	Homo sapiens	50833878(*)	CNOT I	CNOT1	Nucleus	RNA transcription/processing/structure	Protein
ATP	Ngg1 interacting factor 3 like 1 binding protein 1		Xenopus laevis	Q7SZ78	Nif3l1bp1	THOC7	Nucleus	RNA transcription/processing/structure	Protein
ATP	CCR4-NOT transcription complex, subunit 2		Rattus norvegicus	Q5PPJ8	CNOT2	CNOT2	Nucleus	RNA transcription/processing/structure	Protein
NaCl	MGC82755 protein	Similar to RNA polymerase II elongation factor ELL2 (71% in H)	Xenopus laevis	Q6DCJ2	ELL2	ELL2	Nucleus	RNA transcription/processing/structure	Protein
NaCl	MGC53350 protein	Similar to Protein LSM14A /RAP55 (76% in H)	Xenopus laevis	Q8AVJ2	LSM14A/ RAP55	LSM14A	Cytoplasm	RNA transcription/processing/structure	Protein
NaCl	MGC78822 protein	Similar to Pre-mRNA cleavage complex II protein Clp1 (>80% in H)	Xenopus laevis	Q6NS21	HEAB	CLP1	Nucleus	RNA transcription/processing/structure	Protein
NaCl/ATP	DEAD (Asp-Glu-Ala-Asp) box polypeptide 1		Xenopus tropicalis	Q5XH91	DDX1	DDX1	Nucleus	RNA transcription/processing/structure	Protein
NaCl/ATP	Hypothetical protein	Similar to Regulator of nonsense transcripts 3B (69% in H)	Gallus gallus	Q5ZHV0	Upf3B	UPF3B	Nucleus/Cytoplasm	RNA transcription/processing/structure	Protein
NaCl/ATP	MGC81081 protein	Similar to transcription termination factor, RNA polymerase II, [Homo sapiens] , Identities = 627/1220 (51%),	Xenopus laevis	Q6NRX8	TTF2	TTF2		RNA transcription/processing/structure	Protein
NaCl/ATP	Hypothetical LOC496936	Similar to Negative elongation factor B (>50% in H)	Xenopus tropicalis	Q5I0A8	NELF-B	RP13-122B23.3	Nucleus	RNA transcription/processing/structure	Protein
NaCl/ATP	Probable ATP-dependent RNA helicase DDX6		Xenopus laevis	P54824	Ddx6	DDX6	Nucleus	RNA transcription/processing/structure	Protein
NaCl/ATP	Integrator complex subunit 11		Gallus gallus	Q5ZIH0	INTS11	CPSF3L	Nucleus	RNA transcription/processing/structure	Protein
NaCl/ATP	Piwi-like 1		Homo sapiens	Q8TBY5	PIWIL1		Cytoplasm	RNA transcription/processing/structure	Protein
NaCl/ATP	MGC80941 protein	Similar to Regulator of nonsense transcripts 1 (>90% in H)	Xenopus laevis	Q6GNR2	hUpf1	UPF1	Cytoplasm	RNA transcription/processing/structure	Protein
NaCl/ATP	mRNA cap guanine-N7 methyltransferase		Xenopus laevis	Q9I8S2	RG7MT1	RNMT	Nucleus	RNA transcription/processing/structure	Protein
NaCl/ATP	Helicase SKI2W		Homo sapiens	Q15477	Helicase SKI2W	SKIV2L	Nucleus	RNA transcription/processing/structure	Protein
NaCl/ATP	MGC85474 protein	Similar to Wolf-Hirschhorn syndrome candidate 2 (>80% in XL)	Xenopus laevis	Q66IR5	NELF-A	WHSC2	Nucleus	RNA transcription/processing/structure	Protein
ATP	Eukaryote initiation factor 2 beta		Xenopus laevis	Q6Q4H9	eIF-2-beta	EIF2S2	Nucleus	Protein synthesis and folding	Protein
ATP	Eukaryotic translation initiation factor 4 gamma 1		Homo sapiens	Q04637	eIF4GI	EIF4G1	Nucleus	Protein synthesis and folding	Protein
ATP	MGC81714 protein	Similar to ATP-binding cassette sub-family F member 1 (>50% in H)	Xenopus laevis	Q66J73	ABC50	ABCF1	Plasma membrane	Protein synthesis and folding	Protein
ATP	DnaJ (Hsp40) homolog, subfamily A, member 1		Xenopus laevis	Q8AVG6	Dnaja1-prov (HSP40)	DNAJA1	Nucleus	Protein synthesis and folding	Protein
ATP	Eef2-prov protein		Xenopus laevis	Q7ZXP8	eEF-2	EEF2	Nucleus	Protein synthesis and folding	Protein
ATP	EIF4G-related protein NAT1		Xenopus laevis	Q5KTT8	eIF4GII	EIF4G2	Nucleus	Protein synthesis and folding	Protein
ATP	multifunctional aminoacyl-tRNA synthetase		Homo sapiens	P07814	Glut/Prol RS	EPRS	Cytoplasm	Protein synthesis and folding	Protein
ATP	Phenylalanyl-tRNA synthetase alpha chain		Xenopus laevis	Q7SYV0	PheRS alpha	FARSA	Cytoplasm	Protein synthesis and folding	Protein
ATP	Grp58-prov protein.		Xenopus laevis	Q7ZWU3	GRP58	PDIA3	Endoplasmic reticulum/Cytoplasm	Protein synthesis and folding	Protein
ATP	Hspa5-prov protein.		Xenopus laevis	Q8AVE3	Grp78	HSPA5	Endoplasmic reticulum/Cytoplasm	Protein synthesis and folding	Protein
ATP	Hypothetical protein	Similar to Mortalin (>80% in H)	Xenopus laevis	Q7ZX77	GRP75	HSPA9	Cytoplasm/Mitochondria	Protein synthesis and folding	Protein
ATP	MGC85348 protein	Similar to 60S ribosomal protein L23a (>50% in H)	Saccharomyces cerevisiae	Q66KX3	60S ribosomal protein L23a	RPL23A	Nucleus/Cytoplasm	Protein synthesis and folding	Protein
ATP	MGC52733 protein	Similar to 60S ribosomal protein L5-A (>90% in XL)	Xenopus laevis	Q8AVX2	60S RP L5	RPL5	Nucleus/Cytoplasm	Protein synthesis and folding	Protein
ATP	MGC68529 protein	Similar to 40S ribosomal protein S12 (>90% in XL)	Xenopus laevis	Q6PH94	RPS12	RPS12	Cytoplasm	Protein synthesis and folding	Protein
ATP	Tarsl2		Xenopus laevis	Q8BLY2	ThrRS	TARS	Cytoplasm	Protein synthesis and folding	Protein
ATP	Heat shock protein gp96		Xenopus laevis	Q7ZTB3	GRP94	HSP90B1	Endoplasmic reticulum	Protein synthesis and folding	Protein
NaCl	LOC446962 protein (Fragment)	Similar to mitochondrial ribosomal protein L10 isoform b (>80% in XL)	Xenopus laevis	Q66GU9	MRL10	MRPL10	Mitochondria	Protein synthesis and folding	Protein
NaCl	MGC79577 protein	Probable glutamyl-tRNA synthetase, mitochondrial	Xenopus tropicalis	Q66JG3	GluRS	EARS2	Mitochondria	Protein synthesis and folding	Protein
NaCl	Lamr1-prov protein 67kD laminin receptor		Xenopus laevis	Q7ZX07	p40	RPSA	Plasma membrane	Protein synthesis and folding	Protein
NaCl	MGC82641 protein	Similar to Selenocysteine-specific elongation factor (>50% in H)	Xenopus laevis	Q6GPS7	SELB	EEFSEC	Nucleus	Protein synthesis and folding	Protein
NaCl/ATP	Elongation factor 1-alpha, oocyte form		Xenopus laevis	P17508	EF-1-alpha	EEF1A1	Nucleus	Protein synthesis and folding	Protein
NaCl/ATP	Aspartyl-tRNA synthetase		Xenopus laevis	Q8AVK0	AspRS	DARS	Cytoplasm	Protein synthesis and folding	Protein
NaCl/ATP	Multisynthetase complex auxiliary component p43		Xenopus laevis	Q7ZWY7	p43	SCYE1	Extracellular	Protein synthesis and folding	Protein
NaCl/ATP	MGC69518 protein	Similar to Dnaja2-prov protein (>90% in XL)	Xenopus laevis	Q6GLD0	Dnaja2	DNAJA2	Plasma membrane/Cytoplasm	Protein synthesis and folding	Protein
NaCl/ATP	translation elongation factor eEF-1 beta chain		Xenopus laevis	P30151	EF-1-beta	EEF1B2	Nucleus	Protein synthesis and folding	Protein
NaCl/ATP	translation elongation factor eEF-1 delta-2 chain		Xenopus laevis	P29693	EEF1D	EEF1D	Nucleus	Protein synthesis and folding	Protein
NaCl/ATP	translation elongation factor EF-1 gamma		Xenopus laevis	Q91375	EF-1-gamma	EEF1G	Nucleus	Protein synthesis and folding	Protein
NaCl/ATP	Eif2s3-prov protein		Xenopus laevis	Q7ZY57	eIF-2-gamma	EIF2S3	Nucleus	Protein synthesis and folding	Protein
NaCl/ATP	Phenylalanine tRNA synthetase like beta subunit		Xenopus laevis	Q5EBG3	PheRS beta	FARSB	Cytoplasm	Protein synthesis and folding	Protein
NaCl/ATP	MGC69128 protein	Similar to Glutaminyl-tRNA synthetase (>50% in H)	Xenopus laevis	Q6PF26	GlnRS	QARS	Nucleus/Cytoplasm	Protein synthesis and folding	Protein
NaCl/ATP	Hsc70-prov protein		Xenopus laevis	Q8AVE2	Hsc70	HSPA8	Nucleus/Cytoplasm	Protein synthesis and folding	Protein
NaCl/ATP	MGC68929 protein	Similar to Isoleucyl-tRNA synthetase, cytoplasmic (>90% in XL)	Xenopus laevis	Q6P284	IleRS	IARS	Cytoplasm	Protein synthesis and folding	Protein
NaCl/ATP	Jtv1-prov protein		Xenopus laevis	Q7ZYD7	P38	JTV1	Cytoplasm	Protein synthesis and folding	Protein
NaCl/ATP	Kars-prov protein		Xenopus laevis	Q7ZWY9	LysRS	KARS	Nucleus/Cytoplasm/Mitochondria	Protein synthesis and folding	Protein
NaCl/ATP	Methionyl-tRNA synthetase		Xenopus laevis	Q6AZT3	MetRS	MARS	Nucleus/Cytoplasm	Protein synthesis and folding	Protein
NaCl/ATP	Arginyl-tRNA synthetase		Xenopus tropicalis	Q6P1S4	ArgRS	RARS	Cytoplasm	Protein synthesis and folding	Protein
NaCl/ATP	LOC495303 protein	Similar to Valyl-tRNA synthetase (>90% in XL)	Xenopus laevis	Q5U5C2	ValRS	VARS	cytoplasm/Mitochondria	Protein synthesis and folding	Protein
ATP	MGC80185 protein	Similar to 26S protease regulatory subunit 8 (>90% in XL)	Xenopus laevis	Q6GQB7	p45/SUG	PSMC5	Nucleus/Cytoplasm	Protein degradation	Protein
ATP	LOC398495 protein (Fragment)	Similar to Ubiquitin-protein ligase BRE1B (>90% in XL)	Xenopus laevis	Q7ZWV5	BRE1B	RNF40	Cytoplasm	Protein degradation	Protein
ATP	Ubiquitin specific protease 10-prov protein		Xenopus laevis	Q7ZXR7	Ubiquitin thioesterase 10	USP10	Cytoplasm	Protein degradation	Protein
ATP	Ubiquitin specific protease 8-prov protein		Xenopus laevis	Q7ZY76	USP8	USP8	Cytoplasm	Protein degradation	Protein
NaCl	Nuclear receptor co-repressor complex subunit		Xenopus laevis	Q7SZM9	TBLR1	TBL1XR1	Nucleus/Cytoplasm	Protein degradation	Protein
NaCl	Ubc-prov protein Ubiquitin C		Xenopus laevis	Q7SY79	UBC	UBC	Cytoplasm	Protein degradation	Protein
NaCl/ATP	Ubiquitin ligase protein BRE1A		Homo sapiens	Q5VTR2	BRE1A	RNF20	Cytoplasm	Protein degradation	Protein
ATP	leucine rich repeat (in FLII) interacting protein 2 isoform 2		Xenopus laevis	Q6GNW0	LOC398535/ LRRFIP2	LRRFIP2	Cytoplasm	Others	Protein
ATP	serum albumin_ chain A		Homo sapiens	3212456(*)	ALB		Extracellular	Others	Protein
ATP	Als2cr19-prov protein		Xenopus tropicalis	Q5XGI8	ALS2CR19	PARD3B	Nucleus/Cytoplasm/plasma membrane	Others	Protein
ATP	M11s1-prov protein		Xenopus laevis	Q7ZXG8	M11S1	CAPRIN1	Plasma membrane	Others	Protein
ATP	MGC81853 protein	Similar to VAC14 protein (>90% in XL)	Xenopus laevis	Q68F38	FLJ10305	VAC14	Plasma membrane	Others	Protein
NaCl	BAI1-associated protein 1		Homo sapiens	Q96QZ7	BAP-1	RNF2	Cytoplasm	Others	Protein
NaCl	MGC84322 protein	Similar to Nipsnap homolog 3A (>90% in XL)	Xenopus laevis	Q6DJG2	NIPSNAP3A	NIPSNAP3A	cytoplasm/Mitochondria	Others	Protein
NaCl/ATP	ring finger protein 36 (Fragment)		Xenopus laevis	Q6DCK8	Rnf36	TRIM69		Others	Protein
NaCl/ATP	P55		Rattus norvegicus	Q6AYT3	HSPC117	C22orf28	Cytoplasm	Others	Protein
NaCl/ATP	MGC82029 protein	Similar to Tripartite motif protein 2 (>90% in XL)	Xenopus laevis	Q6GM89	RNF86	TRIM2	Cytoplasm	Others	Protein
ATP	Kinesin-like protein KIF13B		Homo sapiens	Q9NQT8	GAKIN	KIF13B	Cytoplasm	Motors	Protein
ATP	Kinesin-like protein KIF6		Homo sapiens	Q6ZMV9	KIF6		Cytoplasm	Motors	Protein
ATP	XCENP-E		Xenopus laevis	O42263	CENPE	CENPE	Cytoplasm	Motors	Protein
ATP	Dynein heavy chain, cytosolic		Rattus norvegicus	P38650	DYHC	DYNC1H1	Cytoplasm	Motors	Protein
ATP	Dynein light intermediate chain 1		Xenopus laevis	Q6DJK4	DLIC1	DYNC1LI1	Cytoplasm	Motors	Protein
ATP	Cytoplasmic dynein intermediate chain (Fragment)		Xenopus laevis	Q98SV2	DH IC-2	DYNC1I2	Cytoplasm	Motors	Protein
ATP	MGC79056 protein	Similar to Kinesin family member 20A (>50% in H)	Xenopus laevis	Q6DEA8	Rabkinesin6	KIF20A	Cytoplasm/Golgi	Motors	Protein
NaCl	Kinesin xkid		Xenopus laevis	Q9I9A8	Xkid	KIF22	Nucleus/Cytoplasm	Motors	Protein
NaCl	Kinesin like protein 3 Xklp3		Xenopus laevis	O93478	xklp3	KIF3B	Cytoplasm	Motors	Protein
NaCl	Kns2-prov protein		Xenopus laevis	Q7ZWP7	KLC1	KLC1	Cytoplasm	Motors	Protein
NaCl	Kif2c-prov protein		Xenopus laevis	Q91636	XKCM1	KIF2C	Cytoplasm	Motors	Protein
NaCl	Carboxy-terminal kinesin 2		Xenopus laevis	P79955	XCTK2	KIFC1	Cytoplasm	Motors	Protein
NaCl/ATP	kinesin-related protein Eg5		Xenopus laevis	P28025	Eg5	KIF11	Cytoplasm	Motors	Protein
NaCl/ATP	Chromosome-associated kinesin KLP1		Xenopus laevis	Q91784	XKLp1	KIF4A	Nucleus/Cytoplasm	Motors	Protein
NaCl/ATP	Kinesin heavy chain		Homo sapiens	P33176	KIF5B		Cytoplasm	Motors	Protein
ATP	MGC81911 protein	Similar to Enoyl Coenzyme A hydratase 1, peroxisomal (>80% in XL)	Xenopus laevis	Q6DJP2	ECH1	ECH1	Nucleus/Cytoplasm	Metabolism	Protein
ATP	Aldolase		Xenopus laevis	O12975	ALDOA	ALDOA	Cytoplasm	Metabolism	Protein
ATP	DECR1 protein (Fragment)		Xenopus tropicalis	Q6DEQ2	DECR1	DECR1	Mitochondria	Metabolism	Protein
ATP	MGC82265 protein		Xenopus laevis	Q6GR01	decr2	DECR2	Cytoplasm	Metabolism	Protein
ATP	Glutaryl-Coenzyme A dehydrogenase		Xenopus laevis	Q6AZV2	GCDH	GCDH	Mitochondria	Metabolism	Protein
ATP	Thiolase-prov protein.		Xenopus laevis	Q7ZTL0	HADHB	HADHB	Mitochondria	Metabolism	Protein
ATP	Mitochondrial malate dehydrogenase 2b		Xenopus laevis	Q6GR58	MDH2	MDH2	Mitochondria	Metabolism	Protein
ATP	MGC68498 protein	Similar to Hydroxysteroid dehydrogenase-like protein (>50% in H)	Xenopus laevis	Q6PAY8	No Reference	HSDL2	No Reference	Metabolism	Protein
ATP	Probable aminopeptidase NPEPL1		Pongo pygmaeus	Q5R7G6	NPEPL1		Cytoplasm	Metabolism	Protein
ATP	MGC84594 protein	Similar to Protein disulfide-isomerase A5 precursor (>50% in H)	Xenopus laevis	Q6DF81	PDIR	PDIA5	Endoplasmic reticulum	Metabolism	Protein
ATP	Pyruvate kinase muscle isozyme-prov (Xenopus laevis)		Xenopus laevis	Q7ZY25	PKM2	PKM2	Cytoplasm/Mitochondria	Metabolism	Protein
ATP	Peptidyl-prolyl cis-trans isomerase B		Xenopus laevis	Q7SZ26	cyclophilin B	PPIB	Endoplasmic reticulum	Metabolism	Protein
ATP	LOC496089 protein	Similar to Peroxiredoxin 4 (>90% in XL)	Xenopus laevis	Q5PPT1	Peroxiredoxin-4	PRDX4	Extracellular/Cytoplasm/Mitochondria	Metabolism	Protein
ATP	Sord-prov protein		Xenopus laevis	Q6DJH7	SORD	SORD	Cytoplasm	Metabolism	Protein
ATP	Thioredoxin reductase 2, mitochondrial precursor		Xenopus laevis	Q7T0L5	TXNRD2	TXNRD2	Mitochondria	Metabolism	Protein
ATP	High density lipoprotein binding protein		Xenopus laevis	Q7ZTN2	Vigilin	HDLBP	Plasma membrane	Metabolism	Protein
NaCl	Alpha3-fucosyltransferase		Xenopus tropicalis	Q6EV12	FUT4	FUT4	Endoplasmic reticulum	Metabolism	Protein
NaCl	Carnitine acetyltransferase	Similar to XT crat; Identities = 601/620 (96%),	Xenopus tropicalis , Xenopus laevis	Q6P4L1, Q6GQ98	crat	CRAT		Metabolism	Protein
NaCl/ATP	acyl-CoA dehydrogenase family member 9		Xenopus laevis	Q6DDF2	ACAD9	ACAD9	Mitochondria	Metabolism	Protein
NaCl/ATP	Formiminotransferase cyclodeaminase		Xenopus tropicalis	Q6DEY5	FTCD	FTCD	Cytoplasm/Golgi	Metabolism	Protein
NaCl/ATP	Methylenetetrahydrofolate dehydrogenase (NADP+ dependent) 1-like		Homo sapiens	Q8WVW0	MTHFD1		Cytoplasm/Mitochondria	Metabolism	Protein
ATP	Dynactin-1		Xenopus laevis	Q6PCJ1	p150 glued	DCTN1	Cytoplasm	MAPs	Protein
ATP	Major vault protein		Xenopus laevis	Q6PF69	MVP	MVP	Nucleus/Cytoplasm	MAPs	Protein
ATP	CPEB-associated factor Maskin		Xenopus laevis, Xenopus tropicalis	Q9PTG8, Q6DIN2	TACC3/Maskin	TACC3	Cytoplasm	MAPs	Protein
ATP	LOC494731 protein (Fragment)	Similar to Restin (>80% in XL)	Xenopus laevis	Q63ZU6	CLIP170	CLIP1	Cytoplasm	MAPs	Protein
NaCl	Microtubule-actin crosslinking factor 1		Homo sapiens	Q9UPN3	MACF1	MACF1	Cytoplasm	MAPs	Protein
NaCl	CLIP-associating protein 1		Homo sapiens	Q7Z460	CLASP1	CLASP1	Cytoplasm	MAPs	Protein
NaCl	Discs, large homolog 7		Xenopus tropicalis	Q6NVT0	HURP	DLG7	Cytoplasm	MAPs	Protein
NaCl	MGC84592 protein	Similar to Hook homolog 2 (>90% in XL)	Xenopus laevis	Q6NRB0	HOOK2	HOOK2	Cytoplasm	MAPs	Protein
NaCl	TPX2 protein		Xenopus laevis	Q6NUF4	TPX2	TPX2	Nucleus	MAPs	Protein
NaCl/ATP	Microtubule associated protein XMAP215		Xenopus laevis	Q9DDV7	XMAP215	CKAP5	Cytoplasm	MAPs	Protein
NaCl/ATP	XEB1B		Xenopus laevis	Q8UW77	Eb1	MAPRE1	Cytoplasm	MAPs	Protein
NaCl/ATP	Echinoderm microtubule associated protein like 1_ isoform b		Homo sapiens	Q8N536	EML1	EML1	Cytoplasm	MAPs	Protein
NaCl/ATP	Echinoderm microtubule associated protein like 4		Xenopus tropicalis	Q6DIP5	EMAP4	EML4	Cytoplasm	MAPs	Protein
NaCl/ATP	RHAMM		Xenopus laevis	Q643Y9	RHAMM	HMMR	Plasma membrane/Cytoplasm	MAPs	Protein
NaCl/ATP	Katanin p60 ATPase-containing subunit		Xenopus laevis	Q9PUL2	P60	KATNAL1	Cytoplasm	MAPs	Protein
NaCl/ATP	Katanin p80		Xenopus laevis	Q7ZYI4	P80	KATNB1	Cytoplasm	MAPs	Protein
NaCl/ATP	microtubule-associated protein 4		Xenopus laevis	Q9YI90	XMAP230/ MAP4	MAP4	Cytoplasm	MAPs	Protein
NaCl/ATP	LIS1		Xenopus laevis	Q90ZL4	LIS1	PAFAH1B1	Cytoplasm	MAPs	Protein
NaCl/ATP	nuclear phosphoprotein xnf7		Xenopus laevis	Q91431	xnf7	TRIM69	Nucleus	MAPs	Protein
ATP	MGC81929 protein	Similar to Defective in sister chromatid cohesion homolog 1; KRTR9337) [DCC1] [Homo sapiens] Identities = 269/393 (68%),	Xenopus laevis	Q6GMB0	DCC1	DCC1		DNA replication /reparation/structure	Protein
ATP	Protein C10orf86	Non-SMC element 4 homolog A [NSMCE4A]	Homo sapiens	Q5SQQ5	NSMCE4A	NSMCE4A		DNA replication /reparation/structure	Protein
ATP	Hypothetical protein DKFZp686O0631	Similar to SMCHD1 protein, structural maintenance of chromosomes flexible hinge domain containing 1	Homo sapiens	Q6AHX6	SMCHD1	SMCHD1		DNA replication /reparation/structure	Protein
ATP	DNA topoisomerase II, alpha		Xenopus laevis	Q6INT0	DNA TOPO II, alpha	TOP2A		DNA replication /reparation/structure	Protein
ATP	Ataxia telangiectasia mutated		Xenopus laevis	Q5MPF8	ATM	ATM	Nucleus/Cytoplasm	DNA replication /reparation/structure	Protein
ATP	Serine/threonine-protein kinase atr		Xenopus laevis	Q9DE14	ATR	ATR	Cytoplasm	DNA replication /reparation/structure	Protein
ATP	Bromodomain-containing protein 4		Xenopus laevis	Q6DFF2	HUNK1	BRD4	Nucleus/Cytoplasm	DNA replication /reparation/structure	Protein
ATP	Helicase		Xenopus laevis	Q8QHA5	Dna2l	DNA2L	Nucleus	DNA replication /reparation/structure	Protein
ATP	Histone deacetylase 1		Pongo pygmaeus	Q5RAG0	HDAC1	HDAC1	Nucleus/Cytoplasm	DNA replication /reparation/structure	Protein
ATP	HELLS protein (Fragment)		Xenopus laevis	Q6DD35	Hells	HELLS	Nucleus	DNA replication /reparation/structure	Protein
ATP	DNA ligase III isoform beta		Xenopus laevis	Q8UVU1	DNA ligase 3	LIG3	Nucleus	DNA replication /reparation/structure	Protein
ATP	Maternal DNA replication licensing factor mcm3		Xenopus laevis	P49739	MCM3	MCM3	Nucleus	DNA replication /reparation/structure	Protein
ATP	Metastasis associated 1-like protein		Xenopus laevis	Q9PUN0	MTA2	MTA2	Nucleus/Cytoplasm	DNA replication /reparation/structure	Protein
ATP	Nucleosome assembly protein 1 p60B		Xenopus laevis	Q7ZY81	hNRP	NAP1L1	Nucleus	DNA replication /reparation/structure	Protein
ATP	MGC68739 protein	Similar to Non-SMC element 1 homolog (>90% in XT)	Xenopus laevis	Q6PAF4	Non-SMC element 1 homolog	NSMCE1	Cytoplasm	DNA replication /reparation/structure	Protein
ATP	Origin recognition complex protein 1		Xenopus laevis	P70049	ORC1	ORC1L	Nucleus	DNA replication /reparation/structure	Protein
ATP	DNA polymerase alpha catalytic subunit		Xenopus laevis	Q9DE46	DNA pol alpha	POLA1	Nucleus	DNA replication /reparation/structure	Protein
ATP	DNA-directed RNA polymerase II 140 kDa polypeptide		Mus musculus	Q8CFI7	RPB2	POLR2B	Nucleus	DNA replication /reparation/structure	Protein
ATP	MGC81245 protein	Similar to Polymerase (RNA) II (DNA directed) polypeptide C (>90% in XL)	Xenopus laevis	Q6IRR3	RPB3	POLR2C	Nucleus	DNA replication /reparation/structure	Protein
ATP	Poly [ADP-ribose] polymerase [Fragment]		Xenopus laevis	Q9PS81	PARP1	PARP1	Nucleus	DNA replication /reparation/structure	Protein
ATP	Dnapol-alpha50-prov protein		Xenopus laevis	Q800A4	p49	PRIM1	Nucleus	DNA replication /reparation/structure	Protein
ATP	LOC496363 protein (Fragment)	Similar to DNA primase large subunit (>90% in XL)	Xenopus laevis	Q5HZL6	p58	PRIM2	Nucleus	DNA replication /reparation/structure	Protein
ATP	DNA-dependent protein kinase catalytic subunit		Xenopus laevis	Q9DEI1	DNA-PK	PRKDC	Nucleus/Cytoplasm	DNA replication /reparation/structure	Protein
ATP	probable DNA repair protein RAD50		Mus musculus	P70388	RAD50	RAD50	Nucleus	DNA replication /reparation/structure	Protein
ATP	Histone-binding protein RBBP4-A		Xenopus laevis	O93377	RBBP-4	RBBP4	Nucleus	DNA replication /reparation/structure	Protein
ATP	Structural maintenance of chromosomes protein 5		Xenopus laevis	Q805A1	SMC5	SMC5	Nucleus	DNA replication /reparation/structure	Protein
ATP	Cut5-related protein		Xenopus laevis	Q800K6	TopBP1	TOPBP1	Nucleus	DNA replication /reparation/structure	Protein
ATP	Transcription elongation regulator 1		Mus musculus	Q8CGF7	CA150	TCERG1	Nucleus	DNA replication /reparation/structure	Protein
NaCl	Hypothetical protein	Similar to Putative CDT1 protein (>90% in XL)	Xenopus laevis	Q6GQH3	Cdt1	CDT1	Nucleus	DNA replication /reparation/structure	Protein
NaCl	ICIS		Xenopus laevis	Q7SZL5	ICIS	MTUS1	Nucleus	DNA replication /reparation/structure	Protein
NaCl	MGC82630 protein	Similar to Polymerase delta-interacting protein 3 (>90% in XL)	Xenopus laevis	Q6GPT4	p46	POLDIP3	Nucleus	DNA replication /reparation/structure	Protein
NaCl	Rad17		Xenopus laevis	Q7ZTA5	RAD17	RAD17	Nucleus	DNA replication /reparation/structure	Protein
NaCl	LOC494751 protein	Similar to Death-inducer obliterator 1; death-associated transcription factor 1 (DIO-1; DATF-1), Identities = 659/1601 (41%), (HS)	Xenopus laevis	Q63ZQ9	DATF-1	DIDO1		DNA replication /reparation/structure	Protein
NaCl	Origin recognition complex subunit 5		Xenopus laevis	Q9WUV0	Orc5	ORC5L		DNA replication /reparation/structure	Protein
NaCl	DNA helicase RECQL		Homo sapiens	P46063	RecQ1	RECQL	Nucleus	DNA replication /reparation/structure	Protein
NaCl	Imitation switch ISWI		Xenopus laevis	Q9DF71, Q6DFM0	hSNF2H	SMARCA5	Nucleus	DNA replication /reparation/structure	Protein
NaCl	MGC53583 protein	Similar to Histone deacetylase 1-B (>80%)	Xenopus laevis	Q7ZYT5	HDAC2	HDAC2	Nucleus/Cytoplasm	DNA replication /reparation/structure	Protein
NaCl/ATP	Structural maintenance of chromosomes protein 3		Xenopus laevis	Q8AW91	SMC3	SMC3	Nucleus	DNA replication /reparation/structure	Protein
NaCl/ATP	AND-1 protein		Xenopus laevis	O13046	And-1	WDHD1	Nucleus/Cytoplasm	DNA replication /reparation/structure	Protein
NaCl/ATP	MGC81475 protein (Smu-1 suppressor of mec-8 and unc-52 protein homolog)		Xenopus laevis	Q6NRT3	SMU1	SMU1	Nucleus/Cytoplasm	DNA replication /reparation/structure	Protein
NaCl/ATP	5' nuclease xFEN1a (Flap endonuclease 1)		Xenopus laevis	P70040	FEN1	FEN1	Nucleus	DNA replication /reparation/structure	Protein
NaCl/ATP	replication licensing factor MCM5		Xenopus laevis	P55862	MCM5	MCM5	Nucleus	DNA replication /reparation/structure	Protein
NaCl/ATP	Crossover junction endonuclease MUS81		Xenopus tropicalis	Q640B4	MUS81	MUS81	Nucleus	DNA replication /reparation/structure	Protein
NaCl/ATP	MGC53625 protein	Similar to Origin recognition complex associated protein p81 (>90% in XL)	Xenopus laevis	Q7ZTR4, O93513	ORC3	ORC3L	Nucleus	DNA replication /reparation/structure	Protein
NaCl/ATP	6-4 photolyase		Xenopus laevis	Q9I910	6-4 photolyase	CRY1	Nucleus	DNA replication /reparation/structure	Protein
NaCl/ATP	Origin recognition complex subunit 2-prov		Xenopus laevis	Q5XGS9	ORC2	ORC2L	Nucleus	DNA replication /reparation/structure	Protein
NaCl/ATP	Origin recognition complex subunit 4		Xenopus laevis	O93479	Orc4	ORC4L	Nucleus	DNA replication /reparation/structure	Protein
NaCl/ATP	Pold protein		Xenopus laevis	Q642R8	DNA pol delta p125	POLD1	Nucleus	DNA replication /reparation/structure	Protein
NaCl/ATP	DNA polymerase subunit delta 2		Xenopus laevis	O93610	DNA pol delta p50	POLD2	Nucleus	DNA replication /reparation/structure	Protein
NaCl/ATP	POLD3 protein (Fragment)		Xenopus laevis	Q6DDT8	DNA pol delta 3	POLD3	Nucleus	DNA replication /reparation/structure	Protein
NaCl/ATP	Replication factor C large subunit		Anas platyrhynchos	Q90238	RFC1	RFC1	Nucleus	DNA replication /reparation/structure	Protein
NaCl/ATP	MGC81391 protein	Similar to Replication factor C (Activator 1) 2 (>80% in R)	Xenopus laevis	Q6NRU3	RFC2	RFC2	Nucleus	DNA replication /reparation/structure	Protein
NaCl/ATP	Replication factor C (Activator 1) 3 (Predicted)		Rattus norvegicus	Q5M830	RFC3	RFC3	Nucleus	DNA replication /reparation/structure	Protein
NaCl/ATP	Replication factor C p37 subunit		Xenopus laevis	Q76LD2	RFC4	RFC4	Nucleus	DNA replication /reparation/structure	Protein
NaCl/ATP	Rfc5-prov protein		Xenopus laevis	Q7ZTM5	RFC5	RFC5	Nucleus	DNA replication /reparation/structure	Protein
NaCl/ATP	Structural maintenance of chromosome 1-like 1 protein		Xenopus laevis	O93308	SMC1	SMC1A	Nucleus	DNA replication /reparation/structure	Protein
NaCl/ATP	chromosomal protein XCAP-E		Xenopus laevis	P50533	XCAP-E/SMC2	SMC2	Nucleus	DNA replication /reparation/structure	Protein
NaCl/ATP	chromosomal protein XCAP-C		Xenopus laevis	P50532	XCAP-C/SMC4	SMC4	Nucleus	DNA replication /reparation/structure	Protein
NaCl/ATP	Structural maintenance of chromosomes protein 6		Xenopus laevis	Q805A0	SMC6	SMC6	Cytoplasm	DNA replication /reparation/structure	Protein
NaCl/ATP	Focus forming activity 1		Xenopus laevis	Q6GPM6	Wrn	WRN	Nucleus	DNA replication /reparation/structure	Protein
NaCl/ATP	Transcription intermediary factor 1-gamma		Homo sapiens	Q9UPN9	TIF1-gamma	TRIM33	Nucleus/Cytoplasm	DNA replication /reparation/structure	Protein
ATP	LOC414515 protein (Fragment)	similar to Desmoplakin (DP) [DSP] [Homo sapiens (Human ; Identities = 271/429 (63%),	Xenopus laevis	Q6NTX5	Dsp	DSP		Cytoskeletal proteins, Actin and intermediate filaments binding proteins	Protein
ATP	Actin, cytoplasmic 1		Xenopus laevis	O93400	Actin beta	ACTB	Cytoplasm	Cytoskeletal proteins, Actin and intermediate filaments binding proteins	Protein
ATP	actin gamma_ cytoskeletal type 5		Xenopus laevis	P53505	Actin gamma 1	ACTG1	Cytoplasm	Cytoskeletal proteins, Actin and intermediate filaments binding proteins	Protein
ATP	Septin-9		Homo sapiens	Q9UHD8	Septin-9	SEPT9	Nucleus	Cytoskeletal proteins, Actin and intermediate filaments binding proteins	Protein
NaCl	Tubulin, beta 3		Xenopus tropicalis	Q6P1T8	Tubulin beta 3	TUBB3	Cytoplasm	Cytoskeletal proteins, Actin and intermediate filaments binding proteins	Protein
NaCl/ATP	tubulin alpha chain		Gallus gallus	71575(*)	Tubulin alpha 3	LOC645348	Cytoplasm	Cytoskeletal proteins, Actin and intermediate filaments binding proteins	Protein
NaCl/ATP	Mec-12-prov protein	Similar to Tubulin alpha-ubiquitous chain (>90% in XL)	Xenopus laevis	Q6DD58	Tubulin Alpha 1	TUBA4A	Cytoplasm	Cytoskeletal proteins, Actin and intermediate filaments binding proteins	Protein
NaCl/ATP	LOC398587 protein	Similar to Plectin 1 (>80% in H)	Xenopus laevis	Q7ZWK4	PLEC1	PLEC1	Cytoplasm	Cytoskeletal proteins, Actin and intermediate filaments binding proteins	Protein
NaCl/ATP	tubulin beta-2 chain		Xenopus laevis	P13602	Tubulin beta 2	TUBB2B	Cytoplasm	Cytoskeletal proteins, Actin and intermediate filaments binding proteins	Protein
NaCl/ATP	Betatub56d-prov protein		Xenopus tropicalis	P30883	Tubulin beta 5	TUBB2C	Cytoplasm	Cytoskeletal proteins, Actin and intermediate filaments binding proteins	Protein
ATP	Tubulin, delta 1		Xenopus laevis	Q5EAU4	Tubulin delta 1	TUBD1	Cytoplasm	Centrosomal protein	Protein
ATP	Epsilon-tubulin		Xenopus laevis	Q8AXK5	Tubulin, epsilon 1	TUBE1	Cytoplasm	Centrosomal protein	Protein
ATP	Gamma-tubulin complex component 2		Xenopus laevis	Q6DDJ4	GCP2	TUBGCP2	Cytoplasm	Centrosomal protein	Protein
NaCl	LOC496146 protein	Similar to Protein C14orf166 (>80% in H)	Xenopus laevis	Q5M9B0	CGI-99	C14orf166	Cytoplasm	Centrosomal protein	Protein
NaCl	Centrosomal protein of 41 kDa		Mus musculus	Q99NF3	TSGA14/ CEP41	TSGA14	Cytoplasm	Centrosomal protein	Protein
NaCl	tubulin gamma chain		Xenopus laevis	P23330	Tubulin gamma 1	TUBG1	Cytoplasm	Centrosomal protein	Protein
NaCl/ATP	MGC81767 protein	Similar to Protein NEDD1 (>60% in XL)	Xenopus laevis	Q641F4	NEDD1	NEDD1	Cytoplasm	Centrosomal protein	Protein
ATP	Cyclin B1		Xenopus tropicalis	Q6P801	cyclin B1	CCNB1	Nucleus/Cytoplasm	Cell cycle	Protein
ATP	Cell division control protein 2-A		Xenopus tropicalis	P35567	cdk1	CDC2	Cytoplasm	Cell cycle	Protein
ATP	LOC495132 protein	Similar to Epithelial cell transforming 2 (>90% in XL)	Xenopus laevis	Q5XGV4	ECT2	ECT2	Cytoplasm	Cell cycle	Protein
ATP	Cdk9-prov protein		Xenopus laevis	Q7ZX42	CDK9	CDK9	Nucleus/Cytoplasm	Cell cycle	Protein
ATP	Dedicator of cyto-kinesis 1 (Fragment)		Homo sapiens	Q5VXF6	DOCK180	DOCK1	Cytoplasm	Cell cycle	Protein
ATP	Dedicator of cytokinesis protein 6		Homo sapiens	Q96HP0	DOCK6		Cytoplasm	Cell cycle	Protein
ATP	Dedicator of cytokinesis 7		Homo sapiens	Q5T1C0	DOCK7		Cytoplasm	Cell cycle	Protein
ATP	MGC82649 protein	Similar to XTimeless interacting protein (>80% in XL)	Xenopus laevis	Q6GPS3	FLJ20516	TIPIN	Nucleus/Cytoplasm	Cell cycle	Protein
ATP	mitogen-activated protein kinase kinase kinase kinase 4		Mus musculus	Q6ZQ68	MAP4K4	MAP4K4	Cytoplasm	Cell cycle	Protein
ATP	Mi-2 histone deacetylase complex protein 66		Xenopus laevis	Q9PUM7	GATAD2A	GATAD2A	Nucleus	Cell cycle	Protein
ATP	MGC80858 protein	Similar to Proliferation-associated protein 2G4 (>90% in XL)	Xenopus laevis	Q6GNV0	hG4-1	PA2G4	Nucleus	Cell cycle	Protein
ATP	S-phase kinase-associated protein 1A		Xenopus laevis	Q71U00	skp1	SKP1	Cytoplasm	Cell cycle	Protein
NaCl	Kinetochore spindle checkpoint protein Ndc80		Xenopus laevis	Q8AWF5	KNTC2/ Hec1	NDC80	Nucleus	Cell cycle	Protein
NaCl	Anapc7-prov protein		Xenopus laevis	Q6DDX5	APC7	ANAPC7	Cytoplasm	Cell cycle	Protein
NaCl	MGC84100 protein	Similar to Septin-7 (>80% in H)	Xenopus laevis	Q6GLZ5	Septin-7	SEPT7	Plasma membrane/Cytoplasm	Cell cycle	Protein
NaCl	Cell division cycle 2-like 6		Xenopus tropicalis	Q6P3N6	CDK8	CDK8	Cytoplasm	Cell cycle	Protein
NaCl	Geminin L		Xenopus laevis	O93355	Geminin	GMNN	Nucleus/Cytoplasm	Cell cycle	Protein
NaCl	G-2 and S-phase expressed 1		Xenopus tropicalis	Q6DEW7	B99	GTSE1	Cytoplasm	Cell cycle	Protein
NaCl	LOC495312 protein	Similar to Ser/Thr protein kinase PAR-1A (>90% in XL)	Xenopus laevis	Q5U5B2	MARK3	MARK3	Cytoplasm	Cell cycle	Protein
NaCl	Cdc6B protein		Xenopus laevis	Q6IP89	CDC6	CDC6	Nucleus	Cell cycle	Protein
NaCl	Rangap1-prov protein		Xenopus laevis	Q7ZY43	RANGAP1	RANGAP1	Nucleus/Cytoplasm	Cell cycle	Protein
NaCl	Kinetochore protein Spc24		Xenopus laevis	Q6NRW3	xSpc24	SPC24	Nucleus	Cell cycle	Protein
NaCl	Protein kinase Cdc7		Xenopus laevis	Q9PWM7	CDC7	CDC7	Nucleus/Cytoplasm	Cell cycle	Protein
NaCl/ATP	LOC398569 protein	Similar to Actin-binding protein anillin (>90% in XL)	Xenopus laevis	Q5XGV1	Anillin	ANLN	Cytoplasm	Cell cycle	Protein
NaCl/ATP	Kinetochore spindle checkpoint protein Nuf2		Xenopus laevis	Q8AWF4	hNuf2	NUF2	Nucleus	Cell cycle	Protein
NaCl/ATP	LOC431925 protein (Fragment)	SSE, (Separase) , Identities = 781/1923 (40%), HS	Xenopus laevis	Q6NR96	separase	ESPL1		Cell cycle	Protein
NaCl/ATP	PAK5 protein		Xenopus laevis	Q5PQ75	PAK-4	PAK4	Cytoplasm/Golgi	Cell cycle	Protein
NaCl/ATP	Serine/threonine-protein kinase PLK1		Xenopus laevis	P70032	Plk1	PLK1	Nucleus	Cell cycle	Protein
NaCl/ATP	Protein phosphatase 2 (Formerly 2A)_ regulatory subunit A (PR 65)_ alpha isoform		Xenopus tropical	Q6DIG6	PPP2R1A	PPP2R1A	Cytoplasm/Mitochondria	Cell cycle	Protein
NaCl/ATP	Serine/threonine-protein kinase Eg2-like (EC 2.7.1.37) (p46XlEg22)		Xenopus laevis	Q91819	aurora A	AURKA	Nucleus/Cytoplasm	Cell cycle	Protein
ATP	MGC68713 protein	Similar to G protein beta subunit-like (GBL protein) [GBL] [Homo sapiens] Q9BVC4_HUMAN Identity 91%	Xenopus laevis	Q6PA72	gbl	GBL		Unspecified proteins	Protein
ATP	LOC445829 protein (Fragment)	Similar to SH3D19, (53% identity to HS)	Xenopus laevis	Q6DFH8		SH3D19		Unspecified proteins	Protein
ATP	Hypothetical protein DKFZp686B2046 (Fragment)	Heatr5a HEAT repeat containing 5A (96% identity with HS)	Homo sapiens	Q7Z3B2				Unspecified proteins	Protein
ATP	KIAA1414 protein (Fragment)	Heatr5a HEAT repeat containing 5A	Homo sapiens	Q9P2D3				Unspecified proteins	Protein
ATP	Hypothetical protein FLJ23790	FAM91A1	Homo sapiens	Q8TE89		FAM91A1		Unspecified proteins	Protein
ATP	Hypothetical protein		Leishmania major	Q4QAT0				Unspecified proteins	Protein
ATP	Hypothetical protein	Coiled-coil domain-containing protein 101 [CCDC101]	Mus musculus	Q8BP09				Unspecified proteins	Protein
ATP	Coiled-coil domain containing 101	Coiled-coil domain-containing protein 101 [CCDC101]	Mus musculus	Q8R0I6				Unspecified proteins	Protein
ATP	LOC494769 protein	RNA-binding motif protein 19) [RBM19] [Identity- 55% with HS)	Xenopus laevis	Q63ZN5		RBM19		Unspecified proteins	Protein
ATP	MGC83934 protein		Xenopus laevis	Q6NRC6		PARP9		Unspecified proteins	Protein
ATP	LOC445828 protein (Fragment)	Similar to Rac GTPase-activating protein 1 (40% identity to RACGAP1, [Homo sapiens]	Xenopus laevis	Q6DFI1				Unspecified proteins	Protein
ATP	MGC81356 protein	Simiar to G patch domain and KOW motifs (80% in XT)	Xenopus laevis	Q6NU07	gpkow	GPKOW		Unspecified proteins	Protein
ATP	Thumpd2-prov protein		Xenopus laevis	Q6DDJ1		THUMPD2		Unspecified proteins	Protein
ATP	MGC80361 protein	Similar to HS Protein FAM98A , Identities = 145/320 (45%)	Xenopus laevis	Q6AXA1		FAM98A		Unspecified proteins	Protein
ATP	LOC496291 protein (Fragment)	Similar to Cell-cycle related and expression-elevated protein in tumor (80% identity with HS)	Xenopus laevis	Q5I039	CREPT	C20orf77		Unspecified proteins	Protein
ATP	MGC89351 protein	similar to UPF0464 protein C15orf44 [C15orf44] [Homo sapiens (Human)] Identities = 460/518 (88%),	Xenopus tropicalis	Q66KD9				Unspecified proteins	Protein
NaCl	RPRC1 protein [Fragment]	MAP7D1 ; Arginine/proline-rich coiled-coil protein 1 containing an E-MAP-115 domain; Human , Identities = 299/400 (74%),	Homo sapiens	Q6NX58	RPRC1	MAP7D1		Unspecified proteins	Protein
NaCl	LOC495219 protein (Fragment)	similar to human URG4 Up-regulated gene 4 [URG4] [Homo sapiens]; Identities = 352/862 (40%),	Xenopus laevis	Q5XG40		URG4		Unspecified proteins	Protein
NaCl	MGC76258 protein		Xenopus tropicalis	45361465*				Unspecified proteins	Protein
NaCl	LOC496282 protein	Similar to Protein FAM96A (79% in H)	Xenopus laevis	Q5I054	FAM96A	FAM96A		Unspecified proteins	Protein
NaCl	LOC446268 protein (Fragment)	Similar to HS PRC1, Identities = 240/622 (38%)**	Xenopus laevis	Q6AX54				Unspecified proteins	Protein
NaCl	MGC83042 protein	Similar to HS KIAA1799 (60%)	Xenopus laevis	50417786*		KIAA1799		Unspecified proteins	Protein
NaCl	MGC68500 protein	Similar to HS Intracellular hyaluronan-binding protein 4 (IHABP4), Identities = 158/429 (36%),	Xenopus laevis	Q6PB22	MGC68500	HABP4		Unspecified proteins	Protein
NaCl	MGC52790 protein		Xenopus laevis	Q7ZXV6		CDKN2AIP		Unspecified proteins	Protein
NaCl	LOC398535 protein	Similar to BAT2 domain containing 1 [bat2d] [Xenopus tropicalis], Identities = 302/362 (83%),	Xenopus laevis	Q6GQL3	bat2d	BAT2D1		Unspecified proteins	Protein
NaCl	MGC82466 protein		Xenopus laevis	Q6DDR4				Unspecified proteins	Protein
NaCl/ATP	Tetratricopeptide repeat protein 37 (TPR repeat protein 37)		Xenopus laevis	Q6DFB8	TTC37	KIAA0372		Unspecified proteins	Protein
NaCl/ATP	MGC53266 protein	Similar to HS PRC1, Identities = 211/490 (43%), **	Xenopus laevis	Q7ZXD0				Unspecified proteins	Protein
	** - another Xenopus protein (Q7T0Z3_XENLA) similar to HS PRC1 shows a higher identity (369/619, 59%)

## Sheet: ATP
SAMPLE	IDENTIFICATION	ACCESSION_NO	MASS	SCORE	MATCHES	SEQ_COV
GA_1-5	LOC398587 protein (Fragment)	Q7ZWK4	170933	2552	83	0.38
GA_1-5	Plectin 7	Q6S388	515272	1342	49	0.07
GA_2-9	Dynein heavy chain, cytosolic	P38650	534449	8180	291	0.4
GA_3-6	Plectin 11	Q6S384	518824	252	9	0.01
GA_4-8	DNA-dependent protein kinase catalytic subunit	Q9DEI1	477877	5673	197	0.33
GA_4-8	Phosphatidylinositol 3-kinase-related protein kinase	Q96Q15	414079	755	24	0.05
GA_4-8	kinesin-related protein	O42263	341639	85	2	0
GA_5-7	Rabconnectin	Q8TDJ6	343078	119	3	0.01
GA_6-11	Ataxia telangiectasia mutated	Q5MPF8	352288	5984	179	0.46
GA_7-4	LOC494731 protein (Fragment)	Q63ZU6	168713	400	13	0.09
GA_7-4	LOC414515 protein (Fragment)	Q6NTX5	49636	83	2	0.04
GA_8-2	microtubule-associated protein 4	T14007	130513	1494	63	0.31
GA_8-2	Hypothetical protein (Fragment)	Q5FWU9	52820	295	8	0.17
GA_8-2	LOC398533 protein (Fragment)	Q6NUB4	57226	208	4	0.1
GA_8-2	Eukaryotic translation initiation factor 4 gamma 1	Q04637	175535	112	3	0.01
GA_9-9	neurofibromatosis-related protein NF1	P21359	320365	1664	54	0.14
GA_9-9	dynein heavy chain_ cytosolic	A38905	534653	654	25	0.04
GA_10-6	GCN1-like protein 1	Q92616	294822	1368	52	0.13
GA_10-6	Serine/threonine-protein kinase atr	Q5EGL8	304270	1321	38	0.13
GA_10-6	unnamed protein product	50833878(*)	269104	488	12	0.05
GA_10-6	Dedicator of cytokinesis 7	Q5T1C0	241153	160	5	0.02
GA_10-6	Neurofibromatosis 1	Q5SYI1	320674	144	5	0.01
GA_10-6	Kinesin-like protein KIF13B	Q9NQT8	205005	137	4	0.02
GA_10-6	Eukaryotic translation initiation factor 4 gamma 1	Q5HYG0	175535	75	2	0.01
GA_10-6	Dedicator of cytokinesis protein 6	Q96HP0	231395	74	2	0
GA_11-5	Microtubule Associated Protein 215 kDa (XMAP215)	Q9PT63	229843	4671	204	0.51
GA_11-5	Citron Rho-interacting kinase	P49025	237388	417	11	0.05
GA_11-5	LOC494757 protein	Q63ZQ1	40653	134	5	0.15
GA_12-4	Cut5-related protein	Q800K6	170885	1524	42	0.28
GA_12-4	Brd4-prov protein	Q6DFF2	152761	405	14	0.07
GA_12-4	KIAA1414 protein (Fragment)	Q9P2D3	173964	198	6	0.02
GA_12-4	Hypothetical protein DKFZp686O0631	Q6AHX6	154008	177	8	0.03
GA_12-4	Hypothetical protein	Q8BP09	30109	172	8	0.13
GA_12-4	Hypothetical protein	Q8BXA9	18162	87	2	0.12
GA_12-4	Hypothetical protein DKFZp686B2046 (Fragment)	Q7Z3B2	55406	76	2	0.03
GA_13-7	Dedicator of cyto-kinesis 1 (Fragment)	Q5VXF6	221620	1080	37	0.13
GA_13-7	LOC398512 protein	Q6INT0	179420	337	14	0.06
GA_14-5	DNA polymerase alpha catalytic subunit	Q9DE46	166553	2108	60	0.39
GA_14-5	Regulator of nonsense transcripts 2	Q9HAU5	148972	1362	51	0.26
GA_14-5	MKIAA0687 protein (Fragment)	Q6ZQ68	144181	378	12	0.1
GA_14-5	FFA-1 protein	Q6GPM6	163082	238	7	0.04
GA_14-5	MGC83635 protein	Q6GN19	117787	66	1	0.01
GA_15-6	Hypothetical protein	Q4QAT0	84168	90	1	0
GA_16-4	chromosomal protein XCAP-C	A55094	147468	2734	95	0.45
GA_16-4	Hypothetical protein	Q5ZJ86	181521	1233	71	0.16
GA_16-4	LOC398569 protein	Q5XGV1	124020	850	23	0.17
GA_16-4	MGC81192 protein	Q6DDZ8	144858	648	19	0.12
GA_16-4	Hdlbp-prov protein	Q7ZTN2	143531	224	6	0.04
GA_16-4	CPEB-associated factor Maskin	Q9PTG8	103423	213	6	0.06
GA_16-4	Dynactin-1	Q6PCJ1	138169	157	4	0.03
GA_16-4	Transcriptional intermediary factor 1 gamma	Q6E2N3	130226	60	1	0
GA_17-5	Structural maintenance of chromosome 1 protein	O93308	143053	3200	102	0.54
GA_17-5	MGC83808 protein	Q6DFB8	177725	2924	76	0.46
GA_17-5	Kif4a-A-prov protein	Q6IRM2	140149	2894	90	0.51
GA_17-5	LOC495064 protein (Fragment)	Q5XH50	84761	1166	33	0.36
GA_17-5	DEAH (Asp-Glu-Ala-His) box polypeptide 38	Q80X98	141333	706	16	0.14
GA_17-5	Transcription intermediary factor 1-gamma	Q9UPN9	123650	425	12	0.08
GA_17-5	Kinesin heavy chain	Q61768	110223	337	11	0.09
GA_17-5	Replication factor C large subunit	Q90238	128406	270	6	0.04
GA_17-5	probable DNA repair protein RAD50	T30845	154533	246	6	0.04
GA_17-5	Transforming acidic coiled coil 3	Q6DIN2	97671	176	5	0.05
GA_18-8	MGC68929 protein	Q6P284	145387	2778	128	0.56
GA_18-8	AND-1 protein	O13046	124650	686	20	0.16
GA_19-3	MGC78831 protein	Q6DD84	137407	4053	131	0.66
GA_19-3	LOC496480 protein (Fragment).	Q5XGI8	88370	605	15	0.17
GA_19-3	Transcription elongation regulator 1	Q8CGF7	119315	598	20	0.12
GA_19-3	LOC398495 protein (Fragment)	Q7ZWV5	71047	585	14	0.26
GA_19-3	TCERG1 protein (Fragment)	Q7ZWT6	59798	431	14	0.19
GA_19-3	ELKS/RAB6-interacting/CAST family member 1	Q8IUD2	125055	408	9	0.08
GA_19-3	Usp8-prov protein	Q7ZY76	121626	376	11	0.09
GA_19-3	multifunctional aminoacyl-tRNA synthetase	SYHUQT	164520	376	11	0.06
GA_19-3	MGC81081 protein	Q6NRX8	132859	216	6	0.05
GA_19-3	Rho interacting protein 3	Q5SWZ3	113489	132	5	0.05
GA_19-3	Usp10-prov protein	Q7ZXR7	89940	122	3	0.04
GA_20-5	Structural maintenance of chromosomes protein 3	Q8AW91	141780	3478	119	0.56
GA_20-5	chromosomal protein XCAP-E	B55094	136656	3195	97	0.53
GA_20-5	MGC68930 protein	Q6P9I7	131458	1677	46	0.42
GA_20-5	LOC397908 protein	Q63ZT3	120652	1092	23	0.23
GA_20-5	LOC398536 protein (Fragment)	Q8AVF3	70925	875	28	0.36
GA_20-5	MGC83937 protein	Q640Z2	117212	369	8	0.07
GA_20-5	MGC83604 protein	Q6GPK9	118560	234	6	0.06
GA_20-5	Superkiller viralicidic activity 2-like	Q6MG76	137724	207	6	0.05
GA_20-5	LOC443724 protein (Fragment)	Q6DJL1	83923	168	4	0.05
GA_20-5	Mec-12-prov protein	Q6DD58	50540	111	3	0.06
GA_20-5	D87930 NID: - Homo sapiens	BAA22378	115610	106	3	0.03
GA_20-5	MGC68685 protein	Q6P423	158352	102	3	0.02
GA_20-5	Rho interacting protein 3 (Fragment)	Q5SWZ8	57623	92	3	0.08
GA_21-9	MGC82093 protein	Q6AX83	135217	3490	168	0.66
GA_21-9	LOC495303 protein	Q5U5C2	142086	2697	103	0.5
GA_21-9	translation elongation factor eEF-1 alpha-O chain	JH0530	50433	282	7	0.15
GA_21-9	DNA-directed RNA polymerase II 140 kDa polypeptide	Q8CFI7	133911	129	6	0.04
GA_22-5	Pold protein	Q642R8	127079	3864	181	0.69
GA_22-5	MGC80941 protein	Q6GNR2	123193	2811	87	0.6
GA_22-5	Structural maintenance of chromosomes protein 5	Q805A1	125943	1113	31	0.29
GA_22-5	Ring finger protein 20	Q5VTR2	114534	313	11	0.08
GA_22-5	ISWI protein	Q6DFM0	122742	181	6	0.05
GA_22-5	MGC52588 protein	Q8AVK8	120980	93	3	0.02
GA_23-4	kinesin heavy chain	P33176	110358	1645	78	0.3
GA_23-4	Helicase	Q8QHA5	121195	1547	46	0.43
GA_23-4	LOC495132 protein	Q5XGV4	111585	663	16	0.18
GA_23-4	serum albumin_ chain A	3212456 (*)	67690	651	23	0.28
GA_23-4	LOC495409 protein (Fragment)	Q5U4Z5	92420	512	14	0.18
GA_23-4	MGC81714 protein	Q66J73	100974	488	15	0.17
GA_23-4	MGC80412 protein	Q6DD27	105927	392	9	0.11
GA_23-4	LOC494769 protein	Q63ZN5	104515	190	5	0.06
GA_23-4	Hypothetical protein	Q5ZMQ1	117000	149	5	0.04
GA_23-4	NAD+:PROTEIN(ADP-ribosyl)-transferase_ ADPRT (Fragment)	Q9PS81	67682	103	2	0.04
GA_24-5	Echinoderm microtubule associated protein like 4	Q6DIP5	103630	1039	35	0.33
GA_24-5	MGC79056 protein	Q6DEA8	101953	362	11	0.12
GA_24-5	Origin recognition complex protein 1	P70049	100765	206	7	0.08
GA_24-5	NAD ADP-ribosyltransferase (EC 2.4.2.30) (fragment)	P31669	111969	144	4	0.03
GA_24-5	M11s1-prov protein	Q7ZXG8	70830	94	3	0.04
GA_24-5	DNA ligase III isoform beta	Q8UVU1	102489	94	3	0.03
GA_25-3	HELLS protein (Fragment)	Q6DD35	88604	1384	50	0.39
GA_25-3	Eef2-prov protein	Q7ZXP8	96449	1289	39	0.39
GA_25-3	Mthfd1-prov protein	Q7ZXF4	101227	905	22	0.26
GA_25-3	EIF4G-related protein NAT1	Q5KTT8	102412	753	25	0.23
GA_25-3	MGC69150 protein	Q6PF21	103606	352	12	0.11
GA_25-3	Heat shock protein gp96	Q7ZTB3	92828	338	8	0.09
GA_25-3	Hypothetical protein FLJ14591	Q96SW6	61379	232	10	0.08
GA_25-3	Tubgcp2-prov protein	Q6DDJ4	60202	220	5	0.11
GA_25-3	Piwi-like 1	Q8TBY5	99395	187	5	0.04
GA_25-3	LOC445829 protein (Fragment)	Q6DFH8	48881	154	4	0.1
GA_25-3	MGC83934 protein	Q6NRC6	103873	138	4	0.05
GA_25-3	Hypothetical protein MGC75658	Q6P356	50491	136	6	0.09
GA_26-8	Mars-prov protein	Q6AZT3	103663	1619	63	0.39
GA_26-8	Maternal DNA replication licensing factor mcm3	P49739	90871	1485	36	0.47
GA_26-8	Pik3c3-prov protein	Q6AZN6	101834	189	4	0.05
GA_26-8	Tarsl2	Q8BLY2	92173	165	4	0.05
GA_26-8	Hypothetical protein FLJ23790	Q8TE89	66060	157	5	0.07
GA_26-8	Hypothetical protein	Q5PPR2	100982	144	5	0.06
GA_27-6	replication licensing factor MCM5 [validated]	P55862	83181	1732	54	0.49
GA_27-6	Karyopherin (Importin) beta 1	Q7TSZ6	98360	525	12	0.16
GA_27-6	MTHFD1L protein	Q8WVW0	80216	297	9	0.1
GA_27-6	kinesin-like protein 1	I51617	140149	272	8	0.06
GA_27-6	Hypothetical protein DKFZp313B047	Q5H9S5	172133	235	5	0.03
GA_27-6	Importin beta subunit (Karyopherin beta subunit) (P97) (Importin 90) (Fragments)	P52297	28955	185	3	0.17
GA_27-6	Hypothetical protein FLJ16639	Q6ZMV9	93012	170	5	0.06
GA_27-6	Smc1l1-prov protein	Q7ZTJ9	143054	166	5	0.03
GA_28-8	MGC69128 protein	Q6PF26	88213	3025	175	0.73
GA_28-8	MGC81853 protein	Q68F38	89944	702	17	0.23
GA_28-8	Cytoplasmic dynein intermediate chain (Fragment)	Q98SV2	67736	552	12	0.22
GA_28-8	P95-APP1	Q9DG15	83011	468	13	0.15
GA_28-8	Sec6l1-prov protein	Q6DJR6	87070	400	13	0.18
GA_28-8	MGC80878 protein	Q6GNU0	85366	397	9	0.12
GA_28-8	Echinoderm microtubule associated protein like 1_ isoform b	Q8N536	90751	250	8	0.06
GA_28-8	Hypothetical LOC496549	Q5XH91	83187	148	4	0.05
GA_28-8	BetaPix-bL	Q6XPA5	92044	128	4	0.04
GA_28-8	Cnot10-prov protein	Q6DE97	84451	127	3	0.03
GA_29-2	Nuclear factor 7, ovary	Q91431	69984	2565	171	0.7
GA_29-2	Rnf36 protein (Fragment)	Q6DCK8	60866	1589	60	0.53
GA_30-7	LOC398473 protein (Fragment)	Q7ZYM0	73864	1354	43	0.44
GA_30-7	Minesin-like protein	Q98TI1	79900	1066	28	0.33
GA_30-7	Hypothetical protein	Q5ZL97	84422	808	34	0.29
GA_30-7	MGC80624 protein	Q6GP79	82758	773	23	0.25
GA_30-7	nuclear phosphoprotein xnf7,Brain	Q92021	69745	594	14	0.22
GA_30-7	Exocyst complex component 7 (Exocyst complex component Exo70)	O35250	80139	367	11	0.09
GA_30-7	LOC445828 protein (Fragment)	Q6DFI1	69633	333	10	0.23
GA_30-7	Metastasis associated 1-like protein	Q9PUN0	75845	260	8	0.12
GA_30-7	MGC86352 protein	Q642N9	83740	160	5	0.09
GA_30-7	Katnb1-prov protein	Q7ZYI4	72589	109	3	0.07
GA_30-7	Hypothetical protein MGC69375	Q6NVL8	66766	108	3	0.05
GA_30-7	MGC81767 protein	Q641F4	72036	102	2	0.03
GA_31-3	DNA polymerase delta p66 subunit	Q76LD3	50456	1108	90	0.56
GA_31-3	MGC81268 protein	Q6DFK7	54386	596	19	0.29
GA_31-3	Origin recognition complex associated protein p81	O93513	82025	426	11	0.15
GA_31-3	MGC85474 protein	Q66IR5	39217	307	10	0.17
GA_31-3	MGC83886 protein	Q6NRE3	56028	254	6	0.12
GA_31-3	Hypothetical protein	Q5F3Y7	59129	203	8	0.1
GA_31-3	Hypothetical LOC496413	Q640B4	69873	183	5	0.08
GA_31-3	MGC53266 protein	Q7ZXD0	68400	172	5	0.09
GA_31-3	MGC82029 protein	Q6GM89	82096	134	4	0.05
GA_31-3	MGC84691 protein	Q6DKB4	55126	110	4	0.08
GA_32-4	Dnm1l-prov protein	Q7ZWZ9	78233	3245	234	0.83
GA_32-4	MGC53952 protein	Q7ZTK6	70976	1388	43	0.5
GA_32-4	Kars-prov protein	Q7ZWY9	70051	523	15	0.21
GA_32-4	Orc2-A-prov protein	Q5XGS9	62902	465	12	0.23
GA_32-4	PAK5 protein	Q5PQ75	74064	366	9	0.16
GA_32-4	MGC53625 protein	Q7ZTR4	82065	114	2	0.03
GA_32-4	Protein kinase C lambda	Q5EGD6	68587	60	1	0.02
GA_33-7	Hypothetical protein MGC7631	Q6P1S4	76008	876	36	0.26
GA_33-7	Cnot2_predicted protein	Q5PPJ8	47228	129	5	0.12
GA_34-8	Krs-1-prov protein	Q801R2	70281	1632	103	0.46
GA_34-8	Frsb-prov protein	Q5EBG3	66404	1334	49	0.57
GA_34-8	Calcium/calmodulin-dependent protein kinase II gamma K subunit	Q9DG00	63748	486	13	0.23
GA_34-8	Mi-2 histone deacetylase complex protein 66	Q9PUM7	45712	187	4	0.1
GA_34-8	LOC443622 protein (Fragment)	Q6GPN8	59788	160	4	0.09
GA_34-8	Septin	Q5R626	37133	116	3	0.12
GA_34-8	Hypothetical protein	Q5ZHV0	57121	116	2	0.05
GA_34-8	DLIC1 protein	Q6DJK4	56286	87	3	0.08
GA_35-4	Hypothetical LOC496936	Q5I0A8	66085	1191	54	0.47
GA_35-4	Negative elongation factor C/D	Q8IXH7	66832	886	35	0.34
GA_35-4	LOC362855 protein	Q6AYT3	55727	839	25	0.34
GA_35-4	Acad9-prov protein	Q6DDF2	68899	636	16	0.26
GA_35-4	Ppp2r1b-prov protein	Q7ZYM9	66167	624	19	0.3
GA_35-4	MGC81356 protein	Q6NU07	54890	431	10	0.25
GA_35-4	LOC496015 protein	Q5PQ14	64090	409	14	0.21
GA_35-4	VAT1 protein (Fragment)	Q66KE1	47082	298	7	0.21
GA_35-4	Shoc2-prov protein	Q8AVI4	64516	283	7	0.1
GA_35-4	Hypothetical protein	Q6GM31	61776	269	9	0.16
GA_35-4	Serine/threonine-protein kinase PLK1	P70032	68938	245	7	0.13
GA_35-4	MGC80234 protein	Q6GQ98	69978	214	7	0.09
GA_35-4	Deoxyribodipyrimidine photo-lyase	Q28811	62333	187	7	0.08
GA_35-4	6-4 photolyase	Q9I910	60991	179	7	0.12
GA_35-4	tubulin beta chain - human	T08726	50377	170	4	0.13
GA_35-4	Glutamyl-prolyl-tRNA synthetase (Fragment)	Q76KD2	66284	141	4	0.09
GA_35-4	LOC431925 protein (Fragment)	Q6NR96	213621	127	5	0.02
GA_35-4	Nap1l1-prov protein	Q7ZY81	45773	113	4	0.1
GA_35-4	Hypothetical protein	Q5ZIH0	68885	93	4	0.05
GA_35-4	MGC89351 protein	Q66KD9	57684	78	2	0.04
GA_36-8	MGC80207 protein	Q6GQA7	60664	1977	97	0.71
GA_36-8	Eef1a-o1 protein	Q7ZXA2	50534	951	41	0.48
GA_36-8	Calcium/calmodulin-dependent protein kinase II gamma J subunit	Q9DG01	61346	756	17	0.38
GA_36-8	Farsl-prov protein	Q7SYV0	56999	544	13	0.3
GA_36-8	Hypothetical protein	Q5XH49	51573	523	15	0.28
GA_36-8	Dnclic1-prov protein	Q7ZXE7	56228	344	10	0.21
GA_36-8	Hypothetical protein DKFZp468K082	Q5RAG0	55638	124	3	0.08
GA_37-8	Dars-prov protein	Q8AVK0	60582	1399	39	0.65
GA_37-8	MGC64458 protein	Q7SYV7	52149	1050	31	0.56
GA_37-8	MGC82761 protein	Q6AZG6	56888	975	28	0.5
GA_37-8	tubulin alpha chain	S00253	50514	940	36	0.54
GA_37-8	translation elongation factor EF-1 gamma	I51237	50173	635	22	0.33
GA_37-8	LOC496363 protein (Fragment)	Q5HZL6	61344	308	8	0.15
GA_37-8	Rbbp4 protein	Q6AZU0	47852	292	7	0.2
GA_37-8	LOC495319 protein	Q5U5A4	50822	243	6	0.12
GA_37-8	Calcium/calmodulin-dependent protein kinase II gamma M subunit	Q9DFZ8	72353	172	5	0.08
GA_37-8	Kpna2-prov protein	Q7ZYI0	58050	114	4	0.07
GA_37-8	Microtubule associated protein XMAP215 isoform M	Q9DDV8	229913	92	2	0.01
GA_38-3	translation elongation factor eEF-1 alpha-O1 chain	S13806	50505	1250	134	0.55
GA_38-3	Tubulin_ beta_ 5	Q6GLE7	50152	1090	43	0.49
GA_38-3	Katanin p60 ATPase-containing subunit [Fragment]	Q9PUL2	55737	809	24	0.33
GA_38-3	Probable ATP-dependent RNA helicase DDX6	P54824	54509	647	16	0.41
GA_38-3	Serine/threonine-protein kinase Eg2-like	Q91819	46717	322	8	0.2
GA_38-3	Platelet-activating factor acetylhydrolase IB alpha subunit	P63005	47079	320	10	0.22
GA_38-3	Kinetochore spindle checkpoint protein Nuf2	Q8AWF4	54761	303	9	0.19
GA_38-3	Probable aminopeptidase NPEPL1	Q5R7G6	56593	255	6	0.11
GA_38-3	MGC81475 protein	Q6NRT3	58213	248	8	0.15
GA_38-3	Txnrd2-prov protein	Q7T0L5	55334	203	5	0.1
GA_38-3	Elongation factor 1-gamma-B	Q91375	50616	194	6	0.13
GA_38-3	Thumpd2-prov protein	Q6DDJ1	52578	169	4	0.1
GA_38-3	LOC398163 protein	Q6IR86	44240	102	4	0.07
GA_38-3	Dnapol-alpha50-prov protein	Q800A4	49643	89	3	0.08
GA_38-3	Cyclin B1	Q6P801	45229	66	1	0.03
GA_39-3	Pold2-prov protein	Q5D0A2	51471	1480	66	0.69
GA_39-3	5' nuclease xFEN1a (Flap endonuclease 1)	P70040	43040	832	30	0.52
GA_39-3	p46Eg265 protein	Q91820	46628	672	29	0.44
GA_39-3	Eif2s3-prov protein	Q7ZY57	51835	659	21	0.43
GA_39-3	MGC64329 protein	Q7SZ09	50146	658	26	0.4
GA_39-3	Eukaryote initiation factor 2 beta	Q6Q4H9	38976	397	10	0.31
GA_39-3	POLD3 protein (Fragment)	Q6DDT8	52740	340	12	0.18
GA_39-3	mRNA cap guanine-N7 methyltransferase	Q9I8S2	46430	204	6	0.16
GA_40-5	Septin A	Q9DE33	41130	1080	46	0.68
GA_40-5	Dnaja1-prov protein	Q8AVG6	45727	740	21	0.57
GA_40-5	actin gamma_ cytoskeletal type 5	P53505	42165	607	20	0.51
GA_40-5	Origin recognition complex subunit 4	O93479	49778	590	20	0.4
GA_40-5	MGC80858 protein	Q6GNV0	43842	444	12	0.28
GA_40-5	Gcdh-prov protein	Q6AZV2	48938	413	11	0.32
GA_40-5	Replication factor C (Activator 1) 3	Q5M830	41194	383	9	0.21
GA_40-5	Betatub56d-prov protein	Q5D080	50240	367	9	0.19
GA_40-5	MGC81929 protein	Q6GMB0	45267	335	8	0.21
GA_40-5	Tubd1-A-prov protein	Q5EAU4	51681	287	7	0.19
GA_40-5	MGC69518 protein	Q6GLD0	45994	193	5	0.12
GA_40-5	MGC80361 protein	Q6AXA1	43244	179	4	0.13
GA_40-5	Cdk9-prov protein	Q7ZX42	43621	152	4	0.13
GA_40-5	MGC68498 protein	Q6PAY8	44873	130	3	0.09
GA_40-5	LOC496052 protein	Q5PPX3	47137	124	4	0.08
GA_40-5	Epsilon-tubulin	Q8AXK5	53201	101	3	0.08
GA_40-5	Transcription elongation regulator 1	Q8CGF7	123938	90	1	0.01
GA_41-7	Scye1-prov protein	Q7ZWY7	32775	1279	79	0.76
GA_41-7	Rfc5-prov protein	Q7ZTM5	38236	397	12	0.38
GA_41-7	Jtv1-prov protein	Q7ZYD7	35081	261	5	0.25
GA_41-7	Protein C10orf86	Q5SQQ5	44388	84	2	0.07
GA_41-7	Elongation factor 1-beta	P30151	25274	63	1	0.08
GA_42-8	MGC52733 protein	Q8AVX2	34318	570	18	0.43
GA_42-8	MGC80304 protein	Q6INU4	34859	544	20	0.48
GA_42-8	Serum albumin	P02769	71274	490	15	0.18
GA_42-8	Aldolase	O12975	39761	452	14	0.32
GA_42-8	MGC81391 protein	Q6NRU3	38945	410	11	0.33
GA_42-8	Septin-9	Q9UHD8	65401	211	6	0.11
GA_43-2	XEB1A	Q8UW78	33090	1387	95	0.84
GA_43-2	LOC496291 protein (Fragment)	Q5I039	36267	401	11	0.35
GA_43-2	Replication factor C p37 subunit	Q76LD2	40498	367	9	0.28
GA_43-2	MGC80325 protein	Q6GQ59	38191	343	10	0.32
GA_43-2	tubulin alpha chain	71575 (*)	46256	231	5	0.17
GA_43-2	Casein kinase I isoform alpha [Fragment]	O19175	14633	140	4	0.3
GA_43-2	Negative elongation factor C/D	Q8IXH7	66247	111	3	0.07
GA_43-2	Coiled-coil domain containing 101	Q8R0I6	33491	84	2	0.07
GA_43-2	X-linked retinitis pigmentosa GTPase regulator-interacting protein 1	Q9EPQ2	63267	69	2	0.05
GA_44-9	MGC81245 protein	Q6IRR3	31658	150	4	0.2
GA_44-9	XEB1B	Q8UW77	33008	87	2	0.11
GA_45-8	Hypothetical LOC496958	Q5I085_XENTR	37947	127	4	0.08

## Sheet: NaCl 
SAMPLE	IDENTIFICATION	ACCESSION_NO	MASS	SCORE	MATCHES	SEQ_COV
GN-1-5	Microtubule-actin crosslinking factor 1	Q5VW20	623626	472	16	0.01
GN-2-4	LOC398587 protein (Fragment)	Q7ZWK4	170933	1658	52	0.24
GN-2-4	LOC494849 protein	Q5XK87	36686	267	9	0.2
GN-3-6	LOC398535 protein	Q6GQL3	38786	180	4	0.11
GN-3-6	dynein heavy chain	A38905	534653	177	6	0.01
GN-4-3	Hypothetical protein MGC69230	Q6NVT0	99404	397	18	0.06
GN-4-3	LOC494751 protein	Q63ZQ9	251581	318	8	0.03
GN-7-3	microtubule-associated protein 4	T14007	130513	1668	124	0.33
GN-9-6	Microtubule Associated Protein 215 kDa	Q9PT63	229843	5220	254	0.55
GN-9-6	Alphatub84b-prov protein	Q7ZYU9	50831	451	12	0.31
GN-9-6	tubulin beta chain - pig	P02554	50285	450	11	0.26
GN-10-4	Microtubule associated protein XMAP215 isoform M	Q9DDV8	229913	1423	36	0.2
GN-11-6	FFA-1 protein	Q6GPM6	163082	1104	31	0.22
GN-11-6	Hypothetical protein	Q5ZJ86	181521	846	32	0.13
GN-11-6	LOC443633 protein (Fragment)	Q6GP94	36201	68	1	0.04
GN-11-6	LOC495219 protein (Fragment)	Q5XG40	127063	53	1	0.01
GN-12-3	LOC398569 protein	Q5XGV1	124020	1005	34	0.23
GN-12-3	chromosomal protein XCAP-C -	A55094	147468	863	20	0.15
GN-12-3	BAI1-associated protein 1	Q96QZ7	165510	261	6	0.04
GN-12-3	Multiple asters 1	Q7Z460	170373	188	6	0.03
GN-12-3	LOC431925 protein (Fragment)	Q6NR96	213621	186	6	0.02
GN-12-3	LOC494817 protein (Fragment)	Q63ZN9	28934	101	2	0.12
GN-12-3	MGC81192 protein	Q6DDZ8	144858	47	1	0.01
GN-13-6	MGC83808 protein	Q6DFB8	177725	2240	61	0.33
GN-13-6	Kif4a-A-prov protein	Q6IRM2	140149	1923	59	0.35
GN-13-6	Structural maintenance of chromosome 1 protein	O93308	143053	1363	44	0.28
GN-13-6	MGC68929 protein	Q6P284	145387	913	28	0.18
GN-13-6	Replication factor C large subunit	Q90238	128406	271	13	0.04
GN-13-6	Transforming acidic coiled coil 3	Q6DIN2	97671	167	6	0.05
GN-13-6	RPRC1 protein [Fragment]	Q6NX58	75964	156	6	0.03
GN-13-6	AND-1 protein	O13046	124650	92	2	0.01
GN-14-3	MGC78831 protein	Q6DD84	137407	5620	271	0.77
GN-14-3	ICIS	Q7SZL5	148232	2100	65	0.34
GN-14-3	MGC81081 protein	Q6NRX8	132859	348	9	0.07
GN-14-3	LOC494809 protein (Fragment)	Q63ZG8	69009	200	6	0.14
GN-14-3	Mus musculus Transcription elongation regulator 1	Q8CGF7	119315	167	5	0.05
GN-14-3	Tripartite motif-containing 33	Q5TG72	122632	125	5	0.02
GN-14-3	kinesin motor domain - human Human Ubiquitous Kinesin Motor Domain.	3891936 (*)	36590	67	1	0.03
GN-14-3	translation elongation factor eEF-1 gamma chain -	S20060	50101	62	1	0.02
GN-15-7	MGC82093 protein	Q6AX83	135217	1974	65	0.41
GN-15-7	LOC495303 protein	Q5U5C2	142086	887	19	0.16
GN-15-7	Structural maintenance of chromosomes protein 3	Q8AW91	141780	592	16	0.15
GN-15-7	Structural maintenance of chromosomes protein 6	Q805A0	131368	199	5	0.05
GN-15-7	Helicase SKI2W (Helicase-like protein) (HLP)	Q15477	138681	103	4	0.02
GN-15-7	Ubc-prov protein Ubiquitin C	Q7SY79	68464	52	2	0.04
GN-16-4	kinesin-related protein Eg5	A40264	120057	3231	140	0.59
GN-16-4	Kinesin heavy chain	Q61768	110223	296	7	0.07
GN-16-4	Chromosome-associated kinesin KLP1	Q91784	140149	200	5	0.04
GN-16-4	chromosomal protein XCAP-E - Structural maintenance of chromosome 2	B55094	136656	48	2	0.01
GN-17-7	translation elongation factor eEF-1 alpha-O1 chain -	S13806	50505	459	24	0.27
GN-17-7	ISWI protein	Q6DFM0	122742	177	5	0.05
GN-18-4	MGC83185 protein.DNA polymerase delta	Q642R8	127079	3084	175	0.59
GN-18-4	Imitation switch ISWI	Q9DF71	122772	1926	69	0.36
GN-18-4	MGC80941 protein	Q6GNR2	123193	1002	29	0.21
GN-18-4	Ring finger protein 20	Q5VTR2	114534	126	3	0.02
GN-19-4	kinesin heavy chain - human KIF5B,	P33176	110358	1433	94	0.26
GN-20-8	Echinoderm microtubule associated protein like 4	Q6DIP5	103630	2018	174	0.44
GN-20-8	Alpha3-fucosyltransferase	Q6EV12	43558	40	1	0.01
GN-21-4	replication licensing factor MCM5	P55862	83181	622	13	0.18
GN-21-4	Karyopherin (Importin) beta 1	Q7TSZ6	98360	522	15	0.18
GN-21-4	MIWI	Q9JMB7	99424	143	4	0.03
GN-21-4	MGC81588 protein	Q66J92	71260	127	6	0.07
GN-21-4	MTHFD1L protein	Q8WVW0	80216	123	4	0.05
GN-21-4	TPX2 protein	Q6NUF4	82917	121	4	0.06
GN-21-4	G-2 and S-phase expressed 1	Q6DEW7	77966	98	4	0.04
GN-21-4	Mars-prov protein	Q6AZT3	103663	95	2	0.02
GN-21-4	MGC76258 protein	Q6DJQ4	71293	43	1	0.02
GN-22-7	MGC69128 protein	Q6PF26	88213	1058	33	0.35
GN-22-7	Microtubule associated protein	Q643Y9	137542	131	4	0.04
GN-22-7	Kif2c-prov protein	Q5D0B4	83047	83	2	0.03
GN-23-3	Nuclear factor 7, ovary	Q91431	69984	1995	115	0.67
GN-23-3	Kinesin like protein 3	O93478	85106	874	25	0.31
GN-23-3	Rnf36 protein (Fragment)	Q6DCK8	60866	796	23	0.37
GN-23-3	Hypothetical LOC496549	Q5XH91	83187	163	5	0.06
GN-23-3	Echinoderm microtubule associated protein like 1_ isoform b	Q8N536	90751	92	2	0.02
GN-24-5	Rad17	Q7ZTA5	75905	550	19	0.22
GN-25-3	Hypothetical protein	Q5XGK6	72587	1774	80	0.61
GN-25-3	Hypothetical protein	Q6GQH3	69772	1274	48	0.43
GN-25-3	nuclear phosphoprotein xnf7	A43906	69745	953	21	0.38
GN-25-3	MGC81767 protein	Q641F4	72036	927	28	0.3
GN-25-3	Katnb1-prov proteinKatanin p80 (WD40-containing) subunit B 1	Q7ZYI4	72589	621	16	0.31
GN-25-3	Kinesin family member 3A	Q5SX84	80148	466	10	0.14
GN-25-3	MGC53266 protein	Q7ZXD0	68400	413	12	0.23
GN-25-3	MGC82755 protein	Q6DCJ2	55308	378	8	0.22
GN-25-3	Hypothetical LOC496580	Q5U4X5	75104	333	15	0.13
GN-25-3	Importin beta subunit (Karyopherin beta subunit) (P97) (Importin 90) (Fragments)	P52297	28955	35	1	0.05
GN-26-3	DNA polymerase delta p66 subunit	Q76LD3	50456	1202	75	0.59
GN-26-3	Kinetochore spindle checkpoint protein Ndc80	Q8AWF5	74972	965	26	0.37
GN-26-3	MGC82029 protein	Q6GM89	82096	896	33	0.36
GN-26-3	LOC446268 protein (Fragment)	Q6AX54	72043	659	23	0.37
GN-26-3	MGC53625 protein	Q7ZTR4	82065	552	13	0.19
GN-26-3	Carboxy-terminal kinesin 2 , XCTK2	P79955	72588	190	5	0.1
GN-26-3	MGC81268 protein	Q6DFK7	54386	183	4	0.09
GN-26-3	LOC496282 protein	Q5I054	17560	40	1	0.09
GN-27-3	Dnm1l-prov protein	Q7ZWZ9	78233	1680	43	0.62
GN-27-3	Hsc70-prov protein	Q8AVE2	71372	1440	51	0.51
GN-27-3	PAK5 protein	Q5PQ75	74064	567	14	0.24
GN-27-3	Rangap1-prov protein	Q7ZY43	63977	529	11	0.22
GN-27-3	Kinetochore protein Hec1 homolog	Q6NRM2	74944	499	14	0.22
GN-27-3	Kars-prov protein	Q7ZWY9	70051	498	19	0.24
GN-27-3	Hypothetical protein MGC76310	Q6P1S4	76008	485	12	0.15
GN-27-3	MGC83886 protein	Q6NRE3	56028	397	15	0.21
GN-27-3	kid	Q9I9A8	73267	376	10	0.13
GN-27-3	LOC495312 protein	Q5U5B2	82265	235	5	0.09
GN-27-3	Orc2-A-prov protein	Q5XGS9	62902	222	8	0.16
GN-27-3	DNA helicase RECQL	A55311	75808	131	3	0.04
GN-27-3	MGC85474 protein	Q66IR5	39217	112	2	0.06
GN-28-5	Kns2-prov protein	Q7ZWP7	61803	1435	39	0.54
GN-28-5	Frsb-prov protein	Q5EBG3	66404	756	23	0.4
GN-28-5	Serine/threonine-protein kinase PLK1	P70032	68938	454	14	0.21
GN-28-5	Krs-1-prov protein	Q801R2	70281	169	4	0.06
GN-28-5	Cdc6B protein	Q6IP89	61810	122	3	0.05
GN-28-5	Anaphase promoting complex subunit 7	Q6DDX5	63729	96	2	0.04
GN-28-5	MGC83042 protein	Q6DCF6	71621	84	2	0.03
GN-28-5	Hypothetical protein	Q5ZHV0	57121	64	1	0.03
GN-28-5	Phosphorylase phosphatase (EC 3.1.3.17)	Q92139	66066	64	1	0.03
GN-29-6	Hypothetical protein	Q6GM31	61776	1309	41	0.49
GN-29-6	Zgc:76871 (Novel protein)	Q6NZS4	55816	489	13	0.22
GN-29-6	Protein phosphatase 2 (Formerly 2A)_ regulatory subunit A (PR 65)_ alpha isoform	Q6DIG6	66072	395	13	0.19
GN-29-6	Microtubule associated protein XMAP215 isoform Z	Q9DDV7	226406	87	3	0.01
GN-29-6	Hypothetical protein	Q5ZIH0	68885	83	2	0.03
GN-30-3	Xcdc6 protein	Q6NRZ9	61524	868	25	0.33
GN-30-3	Hypothetical LOC496936	Q5I0A8	66085	292	7	0.12
GN-30-3	Deoxyribodipyrimidine photo-lyase	Q28811	62333	289	11	0.07
GN-30-3	Hypothetical LOC496413	Q640B4	69873	255	8	0.1
GN-30-3	Hypothetical protein	Q5ZIQ8	66251	160	5	0.1
GN-30-3	MGC53350 protein	Q8AVJ2	51466	117	3	0.07
GN-30-3	Acad9-prov protein	Q6DDF2	68899	114	3	0.05
GN-30-3	Hypothetical protein MGC75895	Q6P4L1	70994	114	3	0.05
GN-31-3	MGC80207 protein	Q6GQA7	60664	1708	65	0.7
GN-31-3	6-4 photolyase	Q9I910	60991	1676	74	0.67
GN-31-3	tubulin alpha chain	S00253	50514	951	40	0.46
GN-31-3	MGC53583 protein	Q7ZYT5	55418	303	9	0.21
GN-31-3	LOC362855 protein	Q6AYT3	55727	207	7	0.12
GN-31-3	Hypothetical protein MGC76204	Q6P3N6	53658	152	6	0.13
GN-31-3	MGC82641 protein	Q6GPS7	63796	125	5	0.11
GN-31-3	Rfc5-prov protein	Q7ZTM5	38236	87	2	0.12
GN-31-3	Nuclear receptor co-repressor complex subunit TBLR1	Q7SZM9	56636	73	2	0.04
GN-31-3	Tubulin-beta-5	Q6GLE7	50152	55	2	0.04
GN-31-3	Protein kinase Cdc7	Q9PWM7	54289	43	1	0.03
GN-31-3	MGC68500 protein	Q6PB22	45615	40	1	0.02
GN-32-4	LOC496111 protein (Fragment)	Q5M9E6	50091	1177	96	0.57
GN-32-4	Hypothetical protein MGC76202	Q6P1T8	50832	600	17	0.28
GN-32-4	MGC81962 protein	Q66KH9	47961	136	5	0.14
GN-33-4	MGC53997 protein	Q7ZY50	50233	1395	142	0.6
GN-33-4	LOC397931 protein	Q5U4V6	50720	1137	58	0.54
GN-33-4	MGC78822 protein	Q6NS21	48819	106	4	0.07
GN-33-4	Smu-1 suppressor of mec-8 and unc-52 homolog	Q6NRT3	58213	78	2	0.04
GN-34-2	Kinetochore spindle checkpoint protein Nuf2	Q8AWF4	54761	1323	55	0.55
GN-34-2	Betatub56d-prov protein	Q5D080	50240	1151	51	0.52
GN-34-2	Probable ATP-dependent RNA helicase DDX6	P54824	54509	950	31	0.45
GN-34-2	Katanin p60 ATPase-containing subunit [Fragment]	Q9PUL2	55737	263	5	0.1
GN-34-2	MGC82630 protein	Q6GPT4	44560	195	6	0.16
GN-34-2	Centrosomal protein of 41 kDa	Q99NF3	41815	145	4	0.09
GN-34-2	LIS1	Q90ZL4	47302	86	2	0.07
GN-35-7	translation elongation factor EF-1 gamma	I51237	50173	1162	68	0.52
GN-35-7	Tubulin gamma-1 chain	P23330	51478	779	19	0.4
GN-35-7	MGC52790 protein	Q7ZXV6	45275	360	12	0.24
GN-35-7	LOC495621 protein (Fragment)	Q5U2C1	48571	116	7	0.09
GN-35-7	MGC84100 protein	Q6GLZ5	49722	110	2	0.05
GN-36-3	Pold2-prov protein	Q5D0A2	51471	1180	48	0.54
GN-36-3	p46Eg265 protein	S52243	46628	830	34	0.54
GN-36-3	Eef1a-o1 protein	Q7ZXA2	50534	732	59	0.46
GN-36-3	Eif2s3-prov protein	Q7ZY57	51835	603	20	0.36
GN-36-3	Hypothetical protein MGC75628	Q6P367	50345	532	13	0.27
GN-36-3	MGC64353 protein	Q7SZ03	45342	295	6	0.19
GN-36-3	POLD3 protein (Fragment)	Q6DDT8	52740	284	7	0.15
GN-36-3	Flap endonuclease 1	O57351	43054	254	8	0.2
GN-36-3	mRNA cap guanine-N7 methyltransferase	Q9I8S2	46430	146	3	0.09
GN-36-3	Lamr1-prov protein	Q7ZX07	34145	131	3	0.14
GN-36-3	MGC79577 protein	Q66JG3	59084	119	2	0.06
GN-37-7	MGC64329 protein	Q7SZ09	50146	1145	66	0.59
GN-37-7	translation elongation factor eEF-1 alpha-O chain -	JH0530	50433	633	33	0.4
GN-37-7	LOC495938 protein	Q5PQ98	51456	432	15	0.31
GN-37-7	Calcium/calmodulin-dependent protein kinase II delta12 subunit	Q9DG02	54469	354	8	0.16
GN-37-7	MGC69074 protein	Q7T0Q9	50812	121	3	0.06
GN-37-7	MGC64458 protein	Q7SYV7	52149	69	2	0.04
GN-38-5	Replication factor C (Activator 1) 3	Q5M830	41194	575	24	0.3
GN-38-5	Origin recognition complex subunit 4	CAA76187	49778	355	8	0.19
GN-38-5	MGC82466 protein	Q6DDR4	15348	56	1	0.11
GN-39-5	MGC81391 protein	Q6NRU3	38945	1298	57	0.8
GN-39-5	Replication factor C p37 subunit	Q76LD2	40498	1031	46	0.61
GN-39-5	Scye1-prov proteinSmall inducible cytokine subfamily E, member 1	Q7ZWY7	32775	522	18	0.52
GN-39-5	tubulin beta-2 chain -	S05968	50148	239	9	0.15
GN-40-6	MGC80325 protein	Q6GQ59	38191	1141	45	0.74
GN-40-6	translation elongation factor eEF-1 delta-2 chain	P29693	28741	567	20	0.5
GN-40-6	MGC80304 protein	Q6INU4	34859	307	8	0.24
GN-40-6	Protein phosphatase 1, catalytic subunit, beta isoform	Q5I085	37947	258	6	0.2
GN-40-6	calgranulin A	P05109	10885	144	4	0.32
GN-40-6	calgranulin B	P06702	13291	93	2	0.24
GN-40-6	XEB1B	Q8UW77	33008	47	1	0.04
GN-41-7	translation elongation factor eEF-1 beta chain	P30151	25274	987	46	0.73
GN-41-7	Geminin L	O93355	25047	167	5	0.2
GN-41-7	Formiminotransferase cyclodeaminase	Q6DEY5	59639	81	3	0.04
GN-41-7	MGC84592 protein	Q6NRB0	85024	36	1	0.01
GN-42-4	Hypothetical protein	Q6NRW3	22878	455	17	0.48
GN-42-4	LOC496146 protein	Q5M9B0	27564	389	9	0.34
GN-42-4	MGC84322 protein	Q6DJG2	29482	309	12	0.27
GN-42-4	LOC446962 protein (Fragment)	Q66GU9	27686	231	7	0.19

## Sheet: 2D gel
SAMPLE	IDENTIFICATION (GEL 2D)	ACC_NUMBER	MASS	SCORE	MATCHES	SEQ_COV
Gache_4	Major vault protein	Q6PF69	96067	670	18	0.15
Gache_18	MGC84594 protein	Q6DF81	60199	151	5	0.08
Gache_18	Pkm2-prov	Q7ZY25	57876	787	21	0.37
Gache_29	MGC68713	Q6PA72	36779	56	1	0.03
Gache_31	THO complex 3	Q6AXK9	36935	205	6	0.07
Gache_32	Mitochondrial malate dehydrogenase 2b	Q6GR58	35915	853	38	0.65
Gache_33	DECR1	Q6DEQ2	36109	310	11	0.21
Gache_34	Cell division control protein 2-A	P35567	34598	1024	35	0.68
Gache_36	MGC82265 protein	Q6GR01	32367	198	4	0.17
Gache_36	Gnb2l1-prov protein	Q8AVP6	35503	641	15	0.47
Gache_38	MGC81911 protein	Q6DJP2	31853	714	23	0.49
Gache_38	MGC68739 protein	Q6PAF4	31497	151	5	0.16
Gache_40	Ywhab-prov protein 14-3-3 protein beta/alpha-B	Q8AVQ3	27856	318	9	0.32
Gache_41	LOC496089 protein	Q5PPT1	30277	496	16	0.51
Gache_45	MGC83078 protein	Q6ING3	22653	263	8	0.37
Gache_46	Nif3l1bp1-prov protein	Q7SZ78	23528	453	17	0.43		Thoc7
Gache_47	Ppib-prov protein	Q7SZ26	23902	745	29	0.64
Gache_48	Iff-2-prov protein	Q7ZXG3	16978	301	19	0.47
Gache_49	MGC68529 protein	Q6PH94	14874	281	12	0.53
Gache_50	alcohol dehydrogenase (EC 1.1.1.1) 1 - yeast (Saccharomyces cerevisiae)	1087099 (*)	37282	925	39	0.61
Gache_50	MGC85348 protein	Q66KX3	17663	46	1	0.07
Gache_50	S-phase kinase-associated protein 1A	Q71U00	18686	285	17	0.22
Gache_1	Actin, cytoplasmic 1	O93400	42082	842	27	0.6
Gache_1	Leucine rich repeat (In FLII) interacting protein 2	Q6GNW0	46264	33	1	0.01
Gache_1b	LOC494882 protein	Q5XHV5	72492	79	1	0.02
Gache_2	MGC83025 protein	Q6GN51	48362	91	5	0.09
Gache_2	MGC83025 protein	Q6GN51	48362	91	5	0.09
Gache_7	Hspa5-prov protein	Q8AVE3	72489	1754	62	0.49
Gache_8	Hspa9b-prov protein	Q7ZX77	72800	522	17	0.23
Gache_8	MGC80185 protein 26S protease regulatory subunit 8	Q6GQB7	46664	41	1	0.01
Gache_12	Cytoplasmic RNA-binding protein p56	P21574	37181	41	1	0.03
Gache_13	Grp58-prov protein	Q7ZWU3	56486	1639	64	0.66
Gache_14b	LOC496111 protein (Fragment)	Q5M9E6	50091	1059	45	0.55
Gache_20	Sord-prov proteinSorbitol dehydrogenase	Q6DJH7	39348	32	2	0.02
Gache_21	LOC494882 protein	Q5XHV5	72492	77	1	0.02
Gache_21	MGC53952 protein	Q7ZTK6	70976	75	2	0.07
Gache_22	MGC68498 protein	Q6PAY8	44873	189	4	0.11
Gache_24	Thiolase-prov protein	Q7ZTL0	50907	81	2	0.03
Gache_27	LOC495713 protein (Fragment)	Q5RKF4	29728	125	3	0.1
Gache_27	LOC496280 protein	Q5RK55	27038	52	1	0.05
Gache_27	MGC82649 protein	Q6GPS3	40483	38	1	0.01
