# Supplementary material for: Xenopus Meiotic Microtubule-Associated Interactome
Source: PLoS One. 2010 Feb 17;5(2):e9248. doi: 10.1371/journal.pone.0009248 (PMC2822853; doi:10.1371/journal.pone.0009248)
Supplement: Table S2 — Sheet 1. List of “MAPs” and motors found in MSP (Sauer et al. 2005) and MeMP (this study). Yellow, green and blue areas show proteins common to both proteomes, MSP and MeMP, respectively. Note that certain known spindle components are listed in the current Table as “MAPs” following the classification of (Sauer et al. 2005), while we placed them into other categories in Supplementary Table 1 and Supplementary Figure 3. Sheet 2. List of eleven known MAPs absent from the MSP (Sauer et al. 2005) with their localizations. (0.04 MB XLS) [file pone.0009248.s010.xls]

## Sheet: MSP vs MeMP
MAPs Sauer et al.,2005		PMID:	MAPs Gache et al.		PMID:		Motors Sauer et al.,2005		Motors Gache et al.
Poly(ADP-ribosyl)transferase	P09874;Q96P95		Poly [ADP-ribose] polymerase	Q9PS81			CENP-E	Q02224	XCENP-E (CENPE)	O42263
TPX2	Q96RR5;Q96FC3	12177045	TPX2 protein	Q6NUF4	9813089		KIF5B	P33176	Kinesin heavy chain (kif5b)	P33176
MSF-A	Q9Y5W4;Q96QF5	12388755	Septin-9	Q9UHD8	inferred		KIF2C	Q99661	Kif2c-prov protein (XKCM1)	Q91636
Microtubule-actin crosslinking factor 1	Q9UPN3	(Mus musculus) 14636561	Microtubule-actin crosslinking factor 1	Q9UPN3	inferred		KIF22	Q14807;Q14984	Kinesin xkid (Kid)	Q9I9A8
MAP4	P27816	6501426	microtubule-associated protein 4	Q9YI90	10564651		KIF20A	O95235	MGC79056 protein (Rabkinesin-6)	Q6DEA8
KIAA0008	Q8NG58;Q15398	16769820	Discs, large homolog 7/HURP	Q6NVT0	16631581		KIF11	P52732;Q15716	kinesin-related protein Eg5 (Eg5)	P28025
Katanin p80 subunit B 1	Q9BVA0;O60620	10751153	Katanin p80	Q7ZYI4	9658175		Dynein, light intermediate polypeptide 2, DYNC1LI2	Q8TAT3	Cytoplasmic dynein intermediate chain 2 (DYNC1LI2)	Q98SV2
Hyaluronan mediated motility receptor	O75330	10547355	RHAMM	Q643Y9	15498487		Dynein heavy chain	Q96L74	Dynein heavy chain, cytosolic (DNCH1)	P38650
gamma-Tubulin complex component 2	Q9BSJ2	11694571	Gamma-tubulin complex component 2/GCP2	Q6DDJ4	15146056		KIFC1	Q9BW19	Carboxy-terminal kinesin 2 (XCTK2)	P79955
E-MAP-4	Q9HC35;Q9NV40	16890222	Echinoderm microtubule associated protein like 4	Q6DIP5	inferred		KIF4A	O95239	Chromosome-associated kinesin KLP1 (XKLp1)	Q91784
CLIP-170 / Restin	P30622	10052454	Restin, clip170	Q63ZU6	17803911		10		Kinesin-like protein KIF6
CLASP1	O75118;Q9BQT5	12837247	CLIP-associating protein 1	Q7Z460	16390996				Kinesin-like protein KIF13B (Gakin)
CH-TOG	Q14008;Q8IYN5	9570755	Microtubule associated protein XMAP215	Q9DDV7	2890645				Kinesin like protein 3 Xklp3 (Kif3a)
gamma-Tubulin complex component 1	P23258;Q9Z310		tubulin gamma chain	P23330	8124706				Dynein light intermediate chain 1 (DYNC1LI1)
Elongation factor 1 alpha 1	P04720;Q96C29	7939665	Elongation factor 1-alpha, oocyte form	P17508	7939665				Kns2-prov protein (Klc1)
15			Septin-7		(Homo Sapiens) 16093351		KIF23	Q8WVP0	5
			Eb1		10899006		Dynein light chain 1, cytoplasmic	Q15701
			Echinoderm microtubule associated protein like 1_ isoform b				MPP1	Q09471;Q9NTC1
			nuclear phosphoprotein xnf7		16213823		Kinesin-like protein 2, KIF15	Q9NS87;Q96JX7
			Major vault protein		(Homo Sapiens) 16310186		Kinectin	Q86UP2
			LIS1		(Homo Sapiens) 9384577		KIFC3	Q9BVG8
			Katanin p60 ATPase-containing subunit		9658175		KIF5A	Q12840
			Hook homolog 2		(Homo Sapiens) 17140400		KIF21B	O75037
			Exocyst complex component 7		(Rattus rattus) 15205466		KIF1B	O60333
			Dynactin-1/p150-Glued		(Homo Sapiens) 16343429		Kif18A	Q9H0F3;Q8NI77
			CPEB-associated factor Maskin/TACC3		16172207		KIF14	Q15058
			Tubulin, delta 1		(Homo Sapiens) 10620804		KIF2 (KIF2A)	O00139;Q7Z5I3
			Epsilon-tubulin		(Homo Sapiens) 10620804		12
			13
Septin 2
MgcRacGAP
Tektin 1
PRC1 isoform 2
PRC1
NuSAP
NuMA
MgcRacGAP-like (FKSG42)
LB1
INCENP
Heat shock 27 kDa protein
GEF-H1
gamma-Tubulin complex component 6
gamma-Tubulin complex component 5
gamma-Tubulin complex component 4
gamma-Tubulin complex component 3
E-MAP-2
E-MAP-115-95
E-MAP-115-105
E-MAP-115
Dynamin-1
CLASP2
Astrin
23

## Sheet: MAPs absent from MSP
Identified MeMP MAPs absent from MSP (Sauer et al., 2005)	Known localization
Echinoderm microtubule associated protein like 1_ isoform b, EMAP1	Meiotic spindle, 1st mitotic embryo spindle, interphase microtubules
XEB1	interphase, spindle microtubules
Transforming acidic coiled coil 3, maskin	spindle microtubules, centrosome
nuclear phosphoprotein xnf7	spindle microtubules
Major vault protein	interphase microtubules
LIS1	interphase, spindle microtubules
Katanin p60 ATPase-containing subunit	spindle microtubules
Hook homolog 2, HOOK2	centrosome, spindle microtubules
Exocyst complex component 7, EXOC7	interphase, spindle microtubules
Epithelial cell transforming 2, ECT2	central spindle microtubules
Dynactin-1, p150Glued	interphase, spindle microtubules
