# Supplementary material for: Xenopus Meiotic Microtubule-Associated Interactome
Source: PLoS One. 2010 Feb 17;5(2):e9248. doi: 10.1371/journal.pone.0009248 (PMC2822853; doi:10.1371/journal.pone.0009248)
Supplement: Table S3 — List of 90 proteins common to MSP and MeMP. Note that only five proteins from the list do not have a known connectivity with other proteins from MeMP and are thus absent from Figures 2 and 5. (0.40 MB XLS) [file pone.0009248.s011.xls]

## Sheet: Feuil1
Supplementary table 3. List of MeMP proteins overlapping with MSP (Sauer et al., 2005)
total = 90 proteins, from which 5 (ACAD9, ADH1A, GCN1L1, hNRP, ThrRS, UBC ) are not shown on the Network (Fig.2)
name in MSP	accession numbers	name in MeMP if different from MSP	Alias	accession numbers in our identification		% identities
78 kDa glucose-regulated protein	P11021;Q9UK02	Grp78	Hspa5	Q8AVE3 (XL)		95
Actin, beta	P60709;Q96DE1	Actin, cytoplasmic 1	actin beta	O93400 (XL)		99
Activator 1 140 kDa subunit	P35251	Replication factor C large subunit	RFC1	Q90238 (XL)		68
Activator 1 36 kDa subunit	P40937	Rfc5-prov protein	RFC5	Q7ZTM5 (XL)		87
Activator 1 37 kDa subunit	P35249	Replication factor C p37 subunit	RFC4	Q76LD2 (XL)		80
Activator 1 38 kDa subunit	P40938	Replication factor C (Activator 1) 3 (Predicted)	RFC3	Q5M830 (RN)		96
Activator 1 40 kDa subunit	P35250	Replication factor C (Activator 1) 2	RFC2	Q6NRU3 (XL)		87
Acyl-CoA dehydrogenase, very-long-chain specific, mitochondr	P49748	acyl-CoA dehydrogenase family member 9	ACAD9	Q6DDF2 (XL)		47	not on the Network
Anaphase promoting complex subunit 7	Q9UJX3	Anapc7-prov protein	APC7	Q6DDX5 (XL)		93
Anillin	Q9NQW6	actin-binding protein anillin	Anillin	Q5XGV1 (XL)		54
Arginyl-tRNA synthetase	P54136	Arginyl-tRNA synthetase	ArgRS	Q6P1S4 (XT)		77
Aspartyl-tRNA synthetase	P14868	Aspartyl-tRNA synthetase	AspRS	Q8AVK0 (XL)		91
ATP-dependent helicase DDX1	Q92499	DEAD (Asp-Glu-Ala-Asp) box polypeptide 1	DDX1	Q5XH91 (XT)		90
Aurora-A	O14965	Serine/threonine-protein kinase Eg2-like (EC 2.7.1.37) (p46XlEg22)	Aurora A	Q91819 (XL)		66
Bifunctional aminoacyl-tRNA synthetase	P07814	multifunctional aminoacyl-tRNA synthetase	Glut/prol RS	SYHUQT (H)		100
CA150	O14776	Transcription elongation regulator 1	CA150	Q8CGF7 (MM)		98
Casein kinase I, alpha	P48729	Casein kinase I isoform alpha [Fragment]	CKI-alpha	O19175 (P)		100
Cdk1	P06493;O60764	Cell division control protein 2-A	cdk1	A44349 (XT)		87
CENP-E	Q02224	XCENP-E	CENPE	O42263 (XL)		63
CGI-99	Q92786	Protein C14orf166	CGI-99	Q5M9B0 (XL)		84
CH-TOG	Q14008;Q8IYN5	Microtubule associated protein XMAP215	XMAP215	Q9DDV7 (XL)		79
CLASP1	O75118;Q9BQT5	CLIP-associating protein 1	CLASP1	Q7Z460 (HS)		100
CLIP-170 / Restin	P30622	Restin	Clip170	Q63ZU6 (XL)		48
Cyclophilin B	Q9BVK5	Peptidyl-prolyl cis-trans isomerase B	Cyclophilin B	Q7SZ26 (XL)		86
DKFZP566O084	Q9BTF9	alcohol dehydrogenase (EC 1.1.1.1) 1	ADH1A	1087099 (SS)			not on the Network
DNA replication licensing factor MCM5	P33992	replication licensing factor MCM5	MCM5	P55862 (XL)		86
DNA-dependent protein kinase DNPK1 catalytic subunit	P78527	DNA-dependent protein kinase catalytic subunit	DNA-PK (DNA-PK catalytic subunit)	Q9DEI1 (XL)		63
DnaJ homolog subfamily A member 1	P31689;Q86TL9	DnaJ (Hsp40) homolog, subfamily A, member 1	Dnaja2 (Hsp40)	Q8AVG6 (XL)		85
Dynein heavy chain	Q96L74	Dynein heavy chain, cytosolic	DYHC	P38650 (RN)		27
Elongation factor 1 alpha 1	P04720;Q96C29	Elongation factor 1-alpha, oocyte form	EF-1-alpha	P17508 (XL)		91
Elongation factor 2	P13639;Q8TA90	Eef2-prov protein	Elongation factor 2	Q7ZXP8 (XL)		95
Elongation factor 4 gamma	O43177	Eukaryotic translation initiation factor 4 gamma 1	eIF-4-gamma 1	Q04637 (HS)		100
E-MAP-4	Q9HC35;Q9NV40	Echinoderm microtubule associated protein like 4	EMAP4	Q6DIP5 (HT)		73
Flap endonuclease-1	P39748	5' nuclease xFEN1a (Flap endonuclease 1)	FEN1	P70040 (XL)		80
FLJ90806 / hSpc24	Q8NBT2	xSpc24	Spc24	Q6NRW3 (XL)		41
gamma-Tubulin complex component 1	P23258;Q9Z310	Gamma-1 tubulin	Gamma-1 tubulin (Tubulin gamma 1)	P23330 (XL)		98
gamma-Tubulin complex component 2	Q9BSJ2	Gamma-tubulin complex component 2	GCP2	Q6DDJ4 (XL)		77
Glutaminyl-tRNA synthetase	P47897	Glutaminyl-tRNA synthetase	GlnRS	Q6PF26 (XL)		77
Guanine nucleotide-binding protein beta subunit-like protein 12.3	P25388	RACK1	rack1	Q8AVP6 (XL)		96
Heat shock cognate 71 kDa protein	P11142;Q96IS6	Hsc70-prov protein	Hsc70	Q8AVE2 (XL)		97
HEC	O14777	Kinetochore spindle checkpoint protein Ndc80	HEC1	Q8AWF5 (XL)		57
Histone deacetylase 2	Q92769;Q8NEH4	Histone deacetylase 1-B	HDAC2	Q7ZYT5 (XL)		91
HSNF2H	O60264	Imitation switch ISWI	hSNF2H	Q9DF71 (XL)		91
Hyaluronan mediated motility receptor	O75330	RHAMM	RHAMM	Q643Y9 (XL)		36
Hypothetical protein HSPC117	Q9BWL4;Q9Y3I0	HSPC117	HSPC117	Q6AYT3 (RN)		99
Importin alpha-2	P52292;Q7Z726	Karyopherin alpha 2	Importin alpha2	Q7ZYI0 (XL)		75
Importin beta-1	Q14974	Importin beta subunit (Karyopherin beta subunit) (P97) (Importin 90) (Fragments)	Importin beta	P52297 (XL)		45
Isoleucyl-tRNA synthetase	Q14690	Isoleucyl-tRNA synthetase, cytoplasmic	IleRS	Q6P284 (XL)
Katanin p80 subunit B 1	Q9BVA0;O60620	Katanin p80	p80	Q7ZYI4 (XL)		71
KIAA0008	Q8NG58;Q15398	Discs, large homolog 7	HURP	Q6NVT0 (XT)		44
KIAA0219	Q92616;Q8WU80	GCN1-like protein 1 (HsGCN1)	GCN1L1	Q92616 (HS)		100	not on the Network
KIF11	P52732;Q15716	kinesin-related protein Eg5	Eg5	A40264 (XL)		55
KIF20A	O95235	Kinesin family member 20A	Rabkinesin6	Q6DEA8 (XL)		62
KIF22	Q14807;Q14984	Kinesin xkid	xkid	Q9I9A8 (XL)		54
KIF2C	Q99661	Kif2c-prov protein, MCAK	XKCM1	Q5D0B4 (XL)		64
KIF4A	O95239	Xklp1	XKLP1	Q91784 (XL)		68
KIF5B	P33176	Kinesin heavy chain	Kif5b	P33176 (HS)		100
KIFC1 (HSET)	Q9BW19	XCTK2	XCTK2	P79955 (XL)		45
MAP4	P27816	microtubule-associated protein 4	XMAP230/MAP4	T14007 (XL)		37
Methionyl-tRNA synthetase	P56192;Q96BZ0	Methionyl-tRNA synthetase	MetRS	Q6AZT3 (XL)		67
Microtubule-actin crosslinking factor 1	Q9UPN3	Microtubule-actin crosslinking factor 1	MACF1	Q5VW20 (HS)		100
MSF-A	Q9Y5W4;Q96QF5	Septin 9	Septin 9	Q9UHD8 (HS)		100
Multisynthetase complex auxiliary component p43	Q12904	Multisynthetase complex auxiliary component p43	p43	Q7ZWY7 (XL)		67
Nucleosome assembly protein 1-like 1	P55209	Nucleosome assembly protein 1 p60B	hNRP	Q7ZY81 (XL)		84	not on the Network
Nuf2	Q96Q78;Q8WU69	Kinetochore spindle checkpoint protein Nuf2	hNUF2	Q8AWF4 (XL)		43
Plectin	Q15149	Plectin 1	PLEC1	Q7ZWK4 (XL)		72
Polo like kinase 1 (PLK1)	P53350;Q99746	Serine/threonine-protein kinase PLK1	polo-like kinase 1	P70032 (XL)		82
Poly(ADP-ribosyl)transferase	P09874;Q96P95	Poly [ADP-ribose] polymerase [Fragment]	PARP1	Q9PS81 (XL)		77
Proliferation-associated protein 2G4	Q9UQ80;Q9UM59	Proliferation-associated protein 2G4	hG4-1	Q6GNV0 (XL)		90
Protein phosphatase 2A, regulatory subunit A (PR 65), beta isoform	Q8NHV8	Protein phosphatase 2 (Formerly 2A)_ regulatory subunit A (PR 65)_ alpha isoform	PPP2R1A	Q6DIG6 (XT)		88
Protein phosphatase PP1-beta	P37140	Protein phosphatase 1, catalytic subunit, beta isoform	PPP-C1B (PP-1A)	Q5I085 (XL)		99
RanGAP1	P46060	Rangap1-prov protein	RANGAP1	Q7ZY43 (XL)		69
Rho; rac-interacting citron kinase	O14578	Citron Rho-interacting kinase	Citron-K	P49025 (MM)		93
ribosomal protein L5	P46777;Q9H3F4	60S ribosomal protein L5-A	60S RP L5	Q8AVX2 (XL)		91
ribosomal protein S12	P25398	p40	laminin receptor 1 (ribosomal protein SA, 67kDa), RPS12 (p40)	Q6PH94 (XL)		96
RNA-binding protein FUS	Q8TBR3	Fusion (Involved in t(12;16) in malignant liposarcoma)	Oncogene FUS	Q6DKB4 (XL)		76
Septin 2	Q15019;Q8IUK9	Septin-2	nedd5	Q5R626 (PP)		99
Serine-protein kinase ATM	Q13315	Ataxia telangiectasia mutated	ATM	Q5MPF8 (XL)		64
SMC1 alpha	Q14683	Structural maintenance of chromosome 1-like 1 protein	SMC1	O93308 (XL)		93
Stress-70 protein, mitochondrial precursor	P38646;Q8N1C8	Mortalin	GRP75	Q7ZX77 (XL)		90
Structural maintenance of chromosome 2-like 1	O95347;Q9P1P2	chromosomal protein XCAP-E	SMC2	B55094 (XL)		93
Structural maintenance of chromosome 3	O60464;Q9UQE7	Structural maintenance of chromosomes protein 3	SMC3	Q8AW91 (XL)		96
Structural maintenance of chromosomes 4-like 1	Q9NTJ3;O95752	chromosomal protein XCAP-C	SMC4	A55094 (XL)		76
Threonyl-tRNA synthetase	P26639	Tarsl2	ThrRS	Q8BLY2 (XL)		74
TPX2	Q96RR5;Q96FC3	TPX2 protein	TPX2	Q6NUF4 (XL)		49
Tubulin alpha-1 chain	P05209	Mec-12-prov protein	tubulin alpha 1	Q6DD58 (XL)		97
Tubulin alpha-3 chain	Q9UQM3	tubulin alpha chain	tubulin alpha 3	71575 (GG)		99
Tubulin beta-2 chain	P05217	tubulin beta-2 chain	tubulin beta 2	S05968 (XL)		97
Tubulin beta-5 chain	P05218	Betatub56d-prov protein	tubulin beta 5	Q5D080 (XT)		97
Ubiquitin	P02248	Ubc-prov protein Ubiquitin C	UBC	Q7SY79 (XL)		100	not on the Network
Anas platyrhynchos (AP)
Xenopus laevis (XL)
Rattus norvegicus (RN)
Mus musculus (MM)
Homo sapiens (HS)
pig (P)
Pongo pygmaeus (PP)
Gallus gallus (GG)
Saccharomyces cerevisiae (SC)
