# Supplementary material for: Xenopus Meiotic Microtubule-Associated Interactome
Source: PLoS One. 2010 Feb 17;5(2):e9248. doi: 10.1371/journal.pone.0009248 (PMC2822853; doi:10.1371/journal.pone.0009248)
Supplement: Table S4 — List of the meiotic microtubule protein interaction network entities (proteins shown in Figure 2). Column “I” contains PubMed references pertaining to links shown in Figure 2. (0.13 MB XLS) [file pone.0009248.s012.xls]

## Sheet: Feuil1
Protein 1 Name	Protein 1 Type	Protein 1 UniProt Accession Number	Protein 2 Name	Protein 2 Type	Protein 2 UniProt Accession Number	Interaction Type	Interaction Source	PubMed references	Part of network	High-throughput Experiment
14-3-3 beta	Protein	Q8AVQ3	MARK3	Protein	Q5U5B2	Binding	Manually verified	16968750	S1, S2, S3
60S ribosomal protein L23a	Protein	Q66KX3	importin	Complex		Binding	Manually verified	11682607	S1, S2, S3
60S RP L5	Protein	Q8AVX2	importin	Complex		Binding	Manually verified	9687515	S1, S2, S3
60S RP L5	Protein	Q8AVX2	PP1	Complex		Binding	Manually verified	10747092	S1, S2, S3
Actin beta	Protein	O93400	PLEC1	Protein	Q7ZWK4	Binding	Manually verified	15128297	S1, S2, S3
AP-3 mu-2	Protein	Q5PPX3	AP-3 adaptor	Complex		Binding	Manually verified	14745134	S1, S2, S3
AspRS	Protein	Q8AVK0	multi t-RNA synthetase	Complex		Binding	Manually verified	15286174	S1, S2, S3
ATM	Protein	Q5MPF8	CDC7	Protein	Q9PWM7	Negative regulation	Manually verified	15220931	S1, S2, S3
ATM	Protein	Q5MPF8	CDK1/cyclin	Complex		Negative regulation	Manually verified	14614452	S1, S2, S3
ATM	Protein	Q5MPF8	DNA-PK	Protein	Q9DEI1	Binding	Manually verified	10464290,11966322	S1, S2, S3
ATM	Protein	Q5MPF8	HDAC1	Protein	Q5RAG0	Binding	Manually verified	10531300,10846170	S1, S2, S3
ATM	Protein	Q5MPF8	MCM3	Protein	P49739	Phosphorylation	Manually verified	15210935	S1, S2, S3
ATM	Protein	Q5MPF8	Plk1	Protein	P70032	Negative regulation	Manually verified	11514540	S1, S2, S3
ATM	Protein	Q5MPF8	PP1	Complex		Positive regulation	Manually verified	12202491,17008050	S1, S2, S3
ATM	Protein	Q5MPF8	PP2A	Complex		Binding	Manually verified	15510216	S1, S2, S3
ATM	Protein	Q5MPF8	RAD17	Protein	Q7ZTA5	Binding	Manually verified	11418864	S1, S2, S3
ATM	Protein	Q5MPF8	SMC1	Protein	O93308	Phosphorylation	Manually verified	11877377,12645530,14701739,14657349	S1, S2, S3
ATR	Protein	Q9DE14	CDC7	Protein	Q9PWM7	Negative Regulation	Manually verified	12897072	S1, S2, S3
ATR	Protein	Q9DE14	Plk1	Protein	P70032	Negative regulation	Manually verified	11514540,12147700	S1, S2, S3
ATR	Protein	Q9DE14	RAD17	Protein	Q7ZTA5	Phosphorylation	Manually verified	12773400,11544175,11799063,11687627	S1, S2, S3
ATR	Protein	Q9DE14	SMC1	Protein	O93308	Phosphorylation	Manually verified	14657349	S1, S2, S3
aurora A	Protein	Q91819	PP1	Complex		Binding	Manually verified	12917355	S1, S2, S3
aurora A	Protein	Q91819	TACC3/ maskin	Protein	Q6DIN2	Binding	Manually verified	16172205	S1, S2, S3
aurora A	Protein	Q91819	TACC3/ maskin	Protein	Q6DIN2	Positive regulation	Manually verified	16172207	S1, S2, S3
aurora A	Protein	Q91819	TPX2	Protein	Q6NUF4	Phosphorylation	Manually verified	3664092422,12177045	S1, S2, S3
aurora A	Protein	Q91819	TPX2	Protein	Q6NUF4	Binding	Manually verified	14600264,15908779	S1, S2, S3
Beta3A-adaptin	Protein	Q6DJL1	AP-3 adaptor	Complex		Binding	Manually verified	9182526,2344684985	S1, S2, S3
Beta-Pix	Protein	Q6XPA5	GIT/PIX	Complex		Binding	Manually verified	15212761	S1, S2, S3
CA150	Protein	Q8CGF7	RNA pol II	Complex		Binding	Manually verified	9315662,10908677	S1, S2, S3
CA150	Protein	Q8CGF7	spliceosome	Complex		Binding	Manually verified	15456888	S1, S2, S3
CAMK2 delta12	Protein	Q9DG02	CaMKII	Complex		Binding	Manually verified	16229015	S1, S2, S3
CAMK2Gj	Protein	Q9DG01	CaMKII	Complex		Binding	Manually verified	16229015	S1, S2, S3
CAMK2Gm	Protein	Q9DFZ8	CaMKII	Complex		Binding	Manually verified	16229015	S1, S2, S3
CDC6	Protein	Q6IP89	CDK1/cyclin	Complex		Binding	Manually verified	9105046,15496876	S1, S2, S3
CDC6	Protein	Q6IP89	MCM3	Protein	P49739	Binding	Manually verified	12912926	S1, S2, S3
CDC6	Protein	Q6IP89	origin recognition	Complex		Binding	Manually verified	8858148	S1, S2, S3
CDC7	Protein	Q9PWM7	Geminin	Protein	O93355	Phosphorylation	Manually verified	10846177	S1, S2, S3
CDC7	Protein	Q9PWM7	MCM3	Protein	P49739	Phosphorylation	Manually verified	9250678	S1, S2, S3
CDC7	Protein	Q9PWM7	origin recognition	Complex		Binding	Manually verified	12614612,9407029	S1, S2, S3
CDK8	Protein	Q6P3N6	RNA pol II	Complex		Binding	Manually verified	8700522	S1, S2, S3
CDK9	Protein	Q7ZX42	RNA pol II	Complex		Binding	Manually verified	12114499,10393184	S1, S2, S3
Cdt1	Protein	Q6GQH3	MCM3	Protein	P49739	Positive regulation	Manually verified	14578910,12087101	S1, S2, S3
Cdt1	Protein	Q6GQH3	ORC2	Protein	Q5XGS9	Binding	Manually verified	12192004	S1, S2, S3
Cdt1	Protein	Q6GQH3	origin recognition	Complex		Binding	Manually verified	10766247	S1, S2, S3
CENPE	Protein	O42263	Microtubule	Complex		Binding	Manually verified	7889940,16144904	S1, S2, S3
Citron-K	Protein	P49025	ECT2	Protein	Q5XGV4	Binding	Manually verified	16803869	S1, S2, S3
CKI-alpha	Protein	O19175	Microtubule	Complex		Binding	Manually verified	14634006	S1, S2, S3
CLASP1	Protein	Q7Z460	CLIP170	Protein	Q63ZU6	Binding	Manually verified	15631994	S1, S2, S3
CLASP1	Protein	Q7Z460	Eb1	Protein	Q8UW77	Binding	Manually verified	15631994	S1, S2, S3
CLASP1	Protein	Q7Z460	ERC1	Protein	Q8IUD2	Binding	Manually verified	16824950	S1, S2, S3
CLASP1	Protein	Q7Z460	Microtubule	Complex		Binding	Manually verified	12837247	S1, S2, S3
CLIP170	Protein	Q63ZU6	Actin beta	Protein	O93400	Binding	Manually verified	14561736	S1, S2, S3
CLIP170	Protein	Q63ZU6	dynactin	Complex		Binding	Manually verified	12789661	S1, S2, S3
CLIP170	Protein	Q63ZU6	LIS1	Protein	Q90ZL4	Binding	Manually verified	11940666,12475954,12686603,11940663,14576344	S1, S2, S3
CLIP170	Protein	Q63ZU6	Microtubule	Complex		Binding	Manually verified	14561736,1356075	S1, S2, S3
CLIP170	Protein	Q63ZU6	p150 glued	Protein	Q6PCJ1	Binding	Manually verified	15381688,3462609524	S1, S2, S3
CNOT10	Protein	Q6DE97	CCR4-NOT	Complex		Binding	Manually verified	15196896	S1, S2, S3
cyclin B1	Protein	Q6P801	cdk1	Protein	P35567	Positive Regulation	Manually verified	11687586	S1, S2, S3
cyclin B1	Protein	Q6P801	importin	Complex		Binding	Manually verified	11060306,9922449,11907280,12805406	S1, S2, S3
cyclin B1	Protein	Q6P801	XMAP230/ MAP4	Protein	Q9YI90	Binding	Manually verified	7876309	S1, S2, S3
cyclophilin B	Protein	Q7SZ26	spliceosome	Complex		Binding	Manually verified	12226669	S1, S2, S3
DCC1	Protein	Q6GMB0	RFC	Complex		Binding	Manually verified	17545166,12930902	S1, S2, S3
DDX1	Protein	Q5XH91	RNA-transporting granule	Complex		Binding	Manually verified	15312650	S1, S2, S3
Ddx38	Protein	Q80X98	spliceosome	Complex		Binding	Manually verified	11574482,9524130,11856747,11886864,7768943,9830021,10601333	S1, S2, S3
DH IC-2	Protein	Q98SV2	dynein	Complex		Binding	Manually verified	10893223	S1, S2, S3
DLIC1	Protein	Q6DJK4	dynein	Complex		Binding	Manually verified	10893223	S1, S2, S3
DNA ligase 3	Protein	Q8UVU1	PARP1	Protein	Q9PS81	Binding	Manually verified	11948190,12897160,12799467	S1, S2, S3
DNA ligase 3	Protein	Q8UVU1	SMC1	Protein	O93308	Binding	Manually verified	10429180	S1, S2, S3
DNA ligase 3	Protein	Q8UVU1	SMC3	Protein	Q8AW91	Binding	Manually verified	10429180	S1, S2, S3
DNA pol alpha	Protein	Q9DE46	DNA pol alpha complex	Complex		Binding	Manually verified	16935576	S1, S2, S3
DNA pol delta p125	Protein	Q642R8	DNA pol delta	Complex		Binding	Manually verified	10196469	S1, S2, S3
DNA-PK	Protein	Q9DEI1	PARP1	Protein	Q9PS81	Phosphorylation	Manually verified	9603959	S1, S2, S3
DNA-PK	Protein	Q9DEI1	PARP1	Protein	Q9PS81	Negative regulation	Manually verified	10467406	S1, S2, S3
DOCK180	Protein	Q5VXF6	DOCK180/ELMO	Complex		Binding	Manually verified	15288806	S1, S2, S3
DYHC	Protein	P38650	dynein	Complex		Binding	Manually verified	10893223	S1, S2, S3
Eb1	Protein	Q8UW77	dynactin	Complex		Binding	Manually verified	16360686	S1, S2, S3
Eb1	Protein	Q8UW77	Microtubule	Complex		Binding	Manually verified	12857735,4246576034	S1, S2, S3
EF-1-alpha	Protein	P17508	EF-1-gamma	Protein	Q91375	Binding	Manually verified	7419519,6922131	S1, S2, S3
EF-1-alpha	Protein	P17508	Microtubule	Complex		Binding	Manually verified	10744861	S1, S2, S3
EF-1-gamma	Protein	Q91375	proteasome	Complex		Binding	Manually verified	12864926	S1, S2, S3
Eg5	Protein	P28025	HURP complex	Complex		Binding	Manually verified	16631581	S1, S2, S3
Eg5	Protein	P28025	Microtubule	Complex		Binding	Manually verified	15247293,15875026	S1, S2, S3
eIF-2-beta	Protein	Q6Q4H9	eIF-2	Complex		Binding	Manually verified	16289913	S1, S2, S3
eIF-2-gamma	Protein	Q7ZY57	eIF-2	Complex		Binding	Manually verified	16289913	S1, S2, S3
eIF-2-gamma	Protein	Q7ZY57	eIF-2-beta	Protein	Q6Q4H9	Binding	Manually verified	12137565	S1, S2, S3
eIF4GI	Protein	Q04637	40S ribosomal subunit	Complex		Binding	Manually verified	10970864,10922367	S1, S2, S3
eIF4GI	Protein	Q04637	eIF4F	Complex		Binding	Manually verified	17086181	S1, S2, S3
eIF4GI	Protein	Q04637	spliceosome	Complex		Binding	Manually verified	11340157,11313486	S1, S2, S3
eIF4GII	Protein	Q5KTT8	eIF4F	Complex		Binding	Manually verified	17086181	S1, S2, S3
ELL2	Protein	Q6DCJ2	RNA pol II	Complex		Positive regulation	Manually verified	9108030	S1, S2, S3
EMAP4	Protein	Q6DIP5	Microtubule	Complex		Binding	Manually verified	16890222	S1, S2, S3
EML1	Protein	Q8N536	Microtubule	Complex		Binding	Manually verified	11807937	S1, S2, S3
EXOC1	Protein	Q5PPR2	exocyst	Complex		Binding	Manually verified	12798134	S1, S2, S3
EXOC3	Protein	Q6DJR6	exocyst	Complex		Binding	Manually verified	12665531,12575951,11493706	S1, S2, S3
EXOC7	Protein	O35250	Microtubule	Complex		Binding	Manually verified	15205466	S1, S2, S3
FEN1	Protein	P70040	Dna2l	Protein	Q8QHA5	Binding	Manually verified	17038322	S1, S2, S3
GAKIN	Protein	Q9NQT8	HURP	Protein	Q6NVT0	Binding	Manually verified	10859302	S1, S2, S3
GAKIN	Protein	Q9NQT8	Microtubule	Complex		Binding	Manually verified	10859302	S1, S2, S3
GCP2	Protein	Q6DDJ4	gamma TURC	Complex		Binding	Manually verified	9566967	S1, S2, S3
GCP2	Protein	Q6DDJ4	Tubulin gamma 1	Protein	P23330	Binding	Manually verified	9566967	S1, S2, S3
Geminin	Protein	O93355	Cdt1	Protein	Q6GQH3	Binding	Manually verified	11125146	S1, S2, S3
Geminin	Protein	O93355	Cdt1	Protein	Q6GQH3	Negative regulation	Manually verified	15376260,15653632,15616577,15670214,15138268	S1, S2, S3
Geminin	Protein	O93355	origin recognition	Complex		Negative regulation	Manually verified	11889049	S1, S2, S3
GIT1	Protein	Q9DG15	GIT/PIX	Complex		Binding	Manually verified	10896954	S1, S2, S3
GlnRS	Protein	Q6PF26	multi t-RNA synthetase	Complex		Binding	Manually verified	15286174	S1, S2, S3
Glut/Prol RS	Protein	P07814	multi t-RNA synthetase	Complex		Binding	Manually verified	15286174	S1, S2, S3
Grp78	Protein	Q8AVE3	RHAMM	Protein	Q643Y9	Binding	Manually verified	16329989	S1, S2, S3
HDAC1	Protein	Q5RAG0	MTA2	Protein	Q9PUN0	Binding	Manually verified	12124384,11509652	S1, S2, S3
HDAC1	Protein	Q5RAG0	PP1	Complex		Binding	Manually verified	14701748	S1, S2, S3
HDAC1	Protein	Q5RAG0	RBBP-4	Protein	O93377	Binding	Manually verified	11470869	S1, S2, S3
HDAC2	Protein	Q7ZYT5	ATR	Protein	Q9DE14	Binding	Manually verified	10545197	S1, S2, S3
HDAC2	Protein	Q7ZYT5	mSin3 co-repressor	Complex		Binding	Manually verified	12724404	S1, S2, S3
HDAC2	Protein	Q7ZYT5	hG4-1	Protein	Q6GNV0	Binding	Manually verified	12682367	S1, S2, S3
Helicase SKI2W	Protein	Q15477	40S ribosomal subunit	Complex		Binding	Manually verified	9705521	S1, S2, S3
Hells	Protein	Q6DD35	SWI/SNF	Complex		Binding	Manually verified	10910076	S1, S2, S3
hNuf2	Protein	Q8AWF4	NDC80	Complex		Binding	Manually verified	12514103	S1, S2, S3
HOOK2	Protein	Q6NRB0	Microtubule	Complex		Binding	Manually verified	11238449,17140400	S1, S2, S3
Hsc70	Protein	Q8AVE2	AP-3 adaptor	Complex		Binding	Manually verified	10722678	S1, S2, S3
Hsc70	Protein	Q8AVE2	Dnaja2	Protein	Q6GLD0	Binding	Manually verified	12040123,10816573	S1, S2, S3
Hsc70	Protein	Q8AVE2	eIF4GI	Protein	Q04637	Binding	Manually verified	10859165	S1, S2, S3
Hsc70	Protein	Q8AVE2	eIF4GII	Protein	Q5KTT8	Binding	Manually verified	10859165	S1, S2, S3
Hsc70	Protein	Q8AVE2	GRP58	Protein	Q7ZWU3	Binding	Manually verified	12517784	S1, S2, S3
Hsc70	Protein	Q8AVE2	importin	Complex		Positive regulation	Manually verified	16203861	S1, S2, S3
Hsc70	Protein	Q8AVE2	PP1	Complex		Binding	Manually verified	9269769	S1, S2, S3
Hsc70	Protein	Q8AVE2	PP2A	Complex		Binding	Manually verified	12604586	S1, S2, S3
Hsc70	Protein	Q8AVE2	proteasome	Complex		Binding	Manually verified	10671488,12721288,12181345,11029046	S1, S2, S3
HSPC117	Protein	Q6AYT3	RNA-transporting granule	Complex		Binding	Manually verified	15312650	S1, S2, S3
HUNK1	Protein	Q6DFF2	RFC	Complex		Binding	Manually verified	12192049	S1, S2, S3
hUpf1	Protein	Q6GNR2	exon junction	Complex		Binding	Manually verified	11691829,11163187	S1, S2, S3
hUpf2	Protein	Q9HAU5	exon junction	Complex		Binding	Manually verified	12093754,11691829,11163187	S1, S2, S3
HURP	Protein	Q6NVT0	Microtubule	Complex		Binding	Manually verified	17118403	S1, S2, S3
IleRS	Protein	Q6P284	multi t-RNA synthetase	Complex		Binding	Manually verified	15286174	S1, S2, S3
Importin alpha2	Protein	Q7ZYI0	importin	Complex		Binding	Manually verified	11751052	S1, S2, S3
Importin alpha2	Protein	Q7ZYI0	nuclear pore	Complex		Binding	Manually verified	11735022	S1, S2, S3
Importin beta	Protein	P52297	cyclin B1	Protein	Q6P801	Binding	Manually verified	9922449	S1, S2, S3
Importin beta	Protein	P52297	HURP	Protein	Q6NVT0	Binding	Manually verified	16631580	S1, S2, S3
Importin beta	Protein	P52297	importin	Complex		Binding	Manually verified	15689618	S1, S2, S3
Importin beta	Protein	P52297	nuclear pore	Complex		Binding	Manually verified	9201707	S1, S2, S3
INTS11	Protein	Q5ZIH0	Integrator	Complex		Binding	Manually verified	16239144	S1, S2, S3
INTS3	Protein	Q5U4Z5	Integrator	Complex		Binding	Manually verified	16239144	S1, S2, S3
KIF5B	Protein	P33176	kinesin I	Complex		Binding	Manually verified	10491391	S1, S2, S3
KIF5B	Protein	P33176	Microtubule	Complex		Binding	Manually verified	12975348	S1, S2, S3
KIF6	Protein	Q6ZMV9	Microtubule	Complex		Binding	Manually verified	9275178	S1, S2, S3
KLC1	Protein	Q7ZWP7	Microtubule	Complex		Binding	Manually verified	12839500	S1, S2, S3
KNTC2/ Hec1	Protein	Q8AWF5	NDC80	Complex		Binding	Manually verified	12514103	S1, S2, S3
KNTC2/ Hec1	Protein	Q8AWF5	SMC1	Protein	O93308	Binding	Manually verified	11985612,12386167	S1, S2, S3
LIS1	Protein	Q90ZL4	DYHC	Protein	P38650	Binding	Manually verified	11509576	S1, S2, S3
LIS1	Protein	Q90ZL4	dynactin	Complex		Binding	Manually verified	14576344,11274050	S1, S2, S3
LIS1	Protein	Q90ZL4	dynein	Complex		Binding	Manually verified	11509576,13129914,12629176,11734602,12475954,12556484,12679384,14576344,10523289,11274050,11134054,15473966,12686603	S1, S2, S3
LIS1	Protein	Q90ZL4	Tubulin gamma 1	Protein	P23330	Binding	Manually verified	11509576	S1, S2, S3
LIS1	Protein	Q90ZL4	zwint	Complex		Binding	Manually verified	16079178	S1, S2, S3
LOC398535/ LRRFIP2	Protein	Q6GNW0	F-actin	Complex		Binding	Manually verified	This study	S1, S2, S3
LSM14A/ RAP55	Protein	Q8AVJ2	Ddx6	Protein	P54824	Binding	Manually verified	17074753	S1, S2, S3
LSM14A/ RAP55	Protein	Q8AVJ2	Microtubule	Complex		Binding	Manually verified	This study	S1, S2, S3
LSM14A/ RAP55	Protein	Q8AVJ2	mRNPs	Complex		Binding	Manually verified	17074753	S1, S2, S3
LysRS	Protein	Q7ZWY9	multi t-RNA synthetase	Complex		Binding	Manually verified	15286174	S1, S2, S3
MACF1	Protein	Q9UPN3	Actin beta	Protein	O93400	Binding	Manually verified	10601340	S1, S2, S3
MACF1	Protein	Q9UPN3	Eb1	Protein	Q8UW77	Binding	Manually verified	15699215	S1, S2, S3
MACF1	Protein	Q9UPN3	Microtubule	Complex		Binding	Manually verified	10601340	S1, S2, S3
MCM5	Protein	P55862	MCM3	Protein	P49739	Binding	Manually verified	9843502,11333269,12060653,7705359,7610039,10454559,11801723,11870205,12953058,9214647,10491086,10783164,10859170,12381663,10644704,10722676,10751424,10770926,10846177,10964916,11454864,11568184,11602595,12087101,12185086,12192004,12200430,12226073,12473677,12519773,12714602,12844493,9099751,9305914,7760938,11163153,11248027,11429609,12185500,12527764,15023545,15108800,15199392,15494305,15522891,1…	S1, S2, S3
MCM5	Protein	P55862	origin recognition	Complex		Binding	Manually verified	15687385	S1, S2, S3
MGC68500	Protein	Q6PB22	Microtubule	Complex		Binding	Manually verified	This study	S1, S2, S3
M-RIP	Protein	P97434	F-actin	Complex		Binding	Manually verified	15469989	S1, S2, S3
MVP	Protein	Q6PF69	Microtubule	Complex		Binding	Manually verified	14584025	S1, S2, S3
NEDD1	Protein	Q641F4	gamma TURC	Complex		Binding	Manually verified	16461362	S1, S2, S3
NEDD1	Protein	Q641F4	Microtubule	Complex		Binding	Manually verified	16461362	S1, S2, S3
NEDD5	Protein	Q5R626	exocyst	Complex		Binding	Manually verified	12544826	S1, S2, S3
NEDD5	Protein	Q5R626	Microtubule	Complex		Binding	Manually verified	12544826	S1, S2, S3
NEDD5	Protein	Q5R626	Septin	Complex		Binding	Manually verified	16093351	S1, S2, S3
NEDD5	Protein	Q5R626	XMAP230/ MAP4	Protein	Q9YI90	Binding	Manually verified	16093351	S1, S2, S3
NELF-A	Protein	Q66IR5	NELF	Complex		Binding	Manually verified	12612062	S1, S2, S3
NELF-B	Protein	Q5I0A8	NELF	Complex		Binding	Manually verified	12612062	S1, S2, S3
NELF-C/D	Protein	Q8IXH7	NELF	Complex		Binding	Manually verified	12612062	S1, S2, S3
Neurofibromin	Protein	Q5SYI1	KIF5B	Protein	P33176	Binding	Manually verified	12191989,12925768	S1, S2, S3
N-WASP	Protein	Q6NRE3	F-actin	Complex		Regulation	Manually verified	11395419	S1, S2, S3
N-WASP	Protein	Q6NRE3	RNA pol II	Complex		Positive regulation	Manually verified	16767080	S1, S2, S3
Oncogene FUS	Protein	Q6DKB4	RNA pol II	Complex		Binding	Manually verified	11278855,12168660	S1, S2, S3
ORC1	Protein	P70049	CDC6	Protein	Q6IP89	Binding	Manually verified	10075735,11346650,12614612,11134348,9566892,10835370,11779870,10436018,11483529,10491086,10793143,11102512	S1, S2, S3
ORC1	Protein	P70049	cdk1	Protein	P35567	Binding	Manually verified	15199143	S1, S2, S3
ORC2	Protein	Q5XGS9	CDC6	Protein	Q6IP89	Binding	Manually verified	12614612	S1, S2, S3
ORC2	Protein	Q5XGS9	ORC1	Protein	P70049	Binding	Manually verified	11102449	S1, S2, S3
ORC2	Protein	Q5XGS9	origin recognition	Complex		Binding	Manually verified	11395502	S1, S2, S3
ORC3	Protein	Q7ZTR4	origin recognition	Complex		Binding	Manually verified	11395502	S1, S2, S3
Orc4	Protein	O93479	origin recognition	Complex		Binding	Manually verified	9829972	S1, S2, S3
Orc5	Protein	Q9WUV0	origin recognition	Complex		Binding	Manually verified	9829972	S1, S2, S3
p150 glued	Protein	Q6PCJ1	dynactin	Complex		Binding	Manually verified	15473859	S1, S2, S3
p150 glued	Protein	Q6PCJ1	dynamin 1-like	Protein	Q7ZWZ9	Binding	Manually verified	15304525	S1, S2, S3
p150 glued	Protein	Q6PCJ1	dynein	Complex		Binding	Manually verified	11340075,10525538,9382864,10588646,10564267,11071907	S1, S2, S3
p150 glued	Protein	Q6PCJ1	Eb1	Protein	Q8UW77	Binding	Manually verified	16360686	S1, S2, S3
p150 glued	Protein	Q6PCJ1	kinesin II	Complex		Binding	Manually verified	12551954,3416899920	S1, S2, S3
p150 glued	Protein	Q6PCJ1	Microtubule	Complex		Binding	Manually verified	16109370	S1, S2, S3
p150 glued	Protein	Q6PCJ1	nuclear pore	Complex		Binding	Manually verified	14600259	S1, S2, S3
P38	Protein	Q7ZYD7	multi t-RNA synthetase	Complex		Binding	Manually verified	9878398	S1, S2, S3
p40	Protein	Q7ZX07	40S ribosomal subunit	Complex		Binding	Manually verified	1374897	S1, S2, S3
p49	Protein	Q800A4	DNA primase	Complex		Binding	Manually verified	16273105	S1, S2, S3
p58	Protein	Q5HZL6	DNA primase	Complex		Binding	Manually verified	16273105	S1, S2, S3
PAR3	Protein	Q6GN19	PKC lambda/iota	Protein	Q5EGD6	Binding	Manually verified	10934474	S1, S2, S3
PARP1	Protein	Q9PS81	60S ribosomal protein L23a	Protein	Q66KX3	Binding	Manually verified	9931508	S1, S2, S3
PARP1	Protein	Q9PS81	DNA pol alpha complex	Complex		Binding	Manually verified	7898473,11448989	S1, S2, S3
PARP1	Protein	Q9PS81	DNA pol delta	Complex		Negative regulation	Manually verified	7805850	S1, S2, S3
PARP1	Protein	Q9PS81	DNA-PK	Protein	Q9DEI1	Binding	Manually verified	12519782	S1, S2, S3
PARP1	Protein	Q9PS81	DNA-PK	Protein	Q9DEI1	Positive regulation	Manually verified	9603959	S1, S2, S3
PARP1	Protein	Q9PS81	FEN1	Protein	P70040	Positive regulation	Manually verified	12637553,12637553	S1, S2, S3
PARP1	Protein	Q9PS81	FEN1	Protein	P70040	Binding	Manually verified	11340072	S1, S2, S3
PARP1	Protein	Q9PS81	proteasome	Complex		Binding	Manually verified	10339569	S1, S2, S3
PARP1	Protein	Q9PS81	proteasome	Complex		Positive regulation	Manually verified	11684461,12386937,10339569	S1, S2, S3
PARP1	Protein	Q9PS81	XKLp1	Protein	Q91784	Binding	Manually verified	16630823,16630823	S1, S2, S3
PI3-K type 3	Protein	Q6AZN6	PI3 Kinase	Complex		Binding	Manually verified	7628435	S1, S2, S3
PKC lambda/iota	Protein	Q5EGD6	ECT2	Protein	Q5XGV4	Binding	Manually verified	15254234	S1, S2, S3
PKC lambda/iota	Protein	Q5EGD6	SMG1	Protein	Q96Q15	Binding	Manually verified	8524286	S1, S2, S3
PLEC1	Protein	Q7ZWK4	Microtubule	Complex		Binding	Manually verified	8922382	S1, S2, S3
Plk1	Protein	P70032	APC	Complex		Positive regulation	Manually verified	10871279,10459014,9660921,15469984,9660921	S1, S2, S3
Plk1	Protein	P70032	cohesin	Complex		Negative regulation	Manually verified	11931760	S1, S2, S3
Plk1	Protein	P70032	cyclin B1	Protein	Q6P801	Phosphorylation/Positive regulation	Manually verified	11242082	S1, S2, S3
Plk1	Protein	P70032	dynactin	Complex		Binding	Manually verified	12679384	S1, S2, S3
Plk1	Protein	P70032	dynein	Complex		Binding	Manually verified	12679384	S1, S2, S3
Plk1	Protein	P70032	ECT2	Protein	Q5XGV4	Binding	Manually verified	16247472	S1, S2, S3
Plk1	Protein	P70032	ECT2	Protein	Q5XGV4	Phosphorylation	Manually verified	16247472	S1, S2, S3
Plk1	Protein	P70032	proteasome	Complex		Phosphorylation/Positive regulation	Manually verified	11205743	S1, S2, S3
Plk1	Protein	P70032	proteasome	Complex		Binding	Manually verified	11205743,11205743	S1, S2, S3
PPP1R12A	Protein	O14974	PP1	Complex		Binding	Manually verified	15748895,16106448	S1, S2, S3
Rabkinesin6	Protein	Q6DEA8	Microtubule	Complex		Binding	Manually verified	9438855	S1, S2, S3
RACK1	Protein	Q8AVP6	PP2A	Complex		Binding	Manually verified	16705158	S1, S2, S3
RAD17	Protein	Q7ZTA5	ATM	Protein	Q5MPF8	Phosphorylation	Manually verified	11544175,11799063	S1, S2, S3
RAD17	Protein	Q7ZTA5	RFC	Complex		Binding	Manually verified	12941802,9755152,9927437,10950868,11691833,11799063,11340080,12167163,12400013,12604797,15210332,9710632,9891047,11572977,12578958,11687627,12865439,10593953,10913172,12578958	S1, S2, S3
RBBP-4	Protein	O93377	mSin3 co-repressor	Complex		Binding	Manually verified	16449650	S1, S2, S3
RBBP-4	Protein	O93377	MTA2	Protein	Q9PUN0	Binding	Manually verified	11602581	S1, S2, S3
RFC1	Protein	Q90238	RFC	Complex		Binding	Manually verified	8248204	S1, S2, S3
RFC4	Protein	Q76LD2	RFC	Complex		Binding	Manually verified	15210332	S1, S2, S3
RG7MT1	Protein	Q9I8S2	Importin alpha2	Protein	Q7ZYI0	Binding	Manually verified	11114884	S1, S2, S3
RHAMM	Protein	Q643Y9	dynein	Complex		Binding	Manually verified	15705883,12808028	S1, S2, S3
RHAMM	Protein	Q643Y9	GRP75	Protein	Q7ZX77	Binding	Manually verified	16329989	S1, S2, S3
RHAMM	Protein	Q643Y9	Microtubule	Complex		Binding	Manually verified	10547355,15498487,15352245	S1, S2, S3
RHAMM	Protein	Q643Y9	TPX2	Protein	Q6NUF4	Binding	Manually verified	15705883,15498487	S1, S2, S3
S100A8	Protein	P05109	S100A8/ S100A9	Complex		Binding	Manually verified	11168370	S1, S2, S3
S100A9	Protein	P06702	S100A8/ S100A9	Complex		Binding	Manually verified	11168370	S1, S2, S3
separase	Protein	Q6NR96	cohesin	Complex		Binding	Manually verified	11509732	S1, S2, S3
separase	Protein	Q6NR96	cyclin B1	Protein	Q6P801	Binding	Manually verified	17974570	S1, S2, S3
separase	Protein	Q6NR96	PP2A	Complex		Binding	Manually verified	17604273	S1, S2, S3
Septin-7	Protein	Q6GLZ5	Septin	Complex		Binding	Manually verified	16093351	S1, S2, S3
Septin-9	Protein	Q9UHD8	Septin	Complex		Binding	Manually verified	16093351	S1, S2, S3
skp1	Protein	Q71U00	CENPE	Protein	O42263	Binding	Manually verified	16682006	S1, S2, S3
SMC1	Protein	O93308	cohesin	Complex		Binding	Manually verified	11983169	S1, S2, S3
SMC1	Protein	O93308	condensin	Complex		Binding	Manually verified	12966087	S1, S2, S3
SMC1	Protein	O93308	SMC3	Protein	Q8AW91	Binding	Manually verified	10429180,9789013	S1, S2, S3
SMC3	Protein	Q8AW91	cohesin	Complex		Binding	Manually verified	11983169	S1, S2, S3
SMC3	Protein	Q8AW91	condensin	Complex		Binding	Manually verified	12966087	S1, S2, S3
SMG1	Protein	Q96Q15	hUpf1	Protein	Q6GNR2	Phosphorylation	Manually verified	12554878	S1, S2, S3
TACC3/ maskin	Protein	Q6DIN2	eIF4F	Complex		Negative regulation	Manually verified	17086181	S1, S2, S3
TACC3/ maskin	Protein	Q6DIN2	Microtubule	Complex		Binding	Manually verified	15788567	S1, S2, S3
TACC3/ maskin	Protein	Q6DIN2	XMAP215	Protein	Q9DDV7	Positive regulation	Manually verified	16172205	S1, S2, S3
Tho3	Protein	Q6AXK9	THO/TREX	Complex		Binding	Manually verified	11979277	S1, S2, S3
TIF1-gamma	Protein	Q9UPN9	RNA-transporting granule	Complex		Binding	Manually verified	15312650	S1, S2, S3
TopBP1	Protein	Q800K6	ATM	Protein	Q5MPF8	Phosphorylation	Manually verified	11756551	S1, S2, S3
TopBP1	Protein	Q800K6	ATR	Protein	Q9DE14	Binding	Manually verified	15155581	S1, S2, S3
TOPOII	Protein	Q6INT0	cdk1	Protein	P35567	Binding	Manually verified	11511510	S1, S2, S3
TOPOII	Protein	Q6INT0	HDAC1	Protein	Q5RAG0	Binding	Manually verified	11062478	S1, S2, S3
TOPOII	Protein	Q6INT0	HDAC2	Protein	Q7ZYT5	Binding	Manually verified	11062478	S1, S2, S3
TPX2	Protein	Q6NUF4	aurora A	Protein	Q91819	Positive regulation	Manually verified	14600264,15908779	S1, S2, S3
TPX2	Protein	Q6NUF4	HURP complex	Complex		Binding	Manually verified	16631581	S1, S2, S3
TPX2	Protein	Q6NUF4	Microtubule	Complex		Binding	Manually verified	15385625	S1, S2, S3
TSGA14/ CEP41	Protein	Q99NF3	Microtubule	Complex		Binding	Manually verified	This study	S1, S2, S3
MGC80361	Protein	Q6AXA1	Microtubule	Complex		Binding	Manually verified	This study	S1, S2, S3
SMU1	Protein	Q6NRT3	Microtubule	Complex		Binding	Manually verified	This study	S1, S2, S3
Tubulin Alpha 1	Protein	Q6DD58	LIS1	Protein	Q90ZL4	Binding	Manually verified	11509576	S1, S2, S3
Tubulin Alpha 1	Protein	Q6DD58	tubulin dimer	Complex		Binding	Manually verified	8294455	S1, S2, S3
Tubulin Alpha 1	Protein	Q6DD58	Tubulin gamma 1	Protein	P23330	Binding	Manually verified	12928331,11694571	S1, S2, S3
Tubulin alpha 3	Protein	71575(*)	tubulin dimer	Complex		Binding	Manually verified	3290224,6208478	S1, S2, S3
Tubulin beta 2	Protein	P13602	RACK1	Protein	Q8AVP6	Binding	Manually verified	12884273	S1, S2, S3
Tubulin beta 2	Protein	P13602	tubulin dimer	Complex		Binding	Manually verified	8294455	S1, S2, S3
Tubulin beta 3	Protein	Q6P1T8	tubulin dimer	Complex		Binding	Manually verified	8294455	S1, S2, S3
Tubulin beta 5	Protein	P30883	tubulin dimer	Complex		Binding	Manually verified	3782288	S1, S2, S3
Tubulin gamma 1	Protein	P23330	gamma TURC	Complex		Binding	Manually verified	8524390	S1, S2, S3
Tubulin gamma 1	Protein	P23330	NEDD1	Protein	Q641F4	Binding	Manually verified	16378099	S1, S2, S3
Tubulin gamma 1	Protein	P23330	Tubulin delta 1	Protein	Q5EAU4	Binding	Manually verified	10753753	S1, S2, S3
Tubulin, epsilon 1	Protein	Q8AXK5	Microtubule	Complex		Binding	Manually verified	12510196,12429830,11148142	S1, S2, S3
ValRS	Protein	Q5U5C2	EF-1-alpha	Protein	P17508	Binding	Manually verified	9988688	S1, S2, S3
Vigilin	Protein	Q7ZTN2	DNA-PK	Protein	Q9DEI1	Binding	Manually verified	15723802	S1, S2, S3
Wrn	Protein	Q6GPM6	FEN1	Protein	P70040	Positive regulation	Manually verified	11598021	S1, S2, S3
Wrn	Protein	Q6GPM6	FEN1	Protein	P70040	Binding	Manually verified	11598021,15592449	S1, S2, S3
XCAP-C/SMC4	Protein	P50532	condensin	Complex		Binding	Manually verified	12966087,14532007	S1, S2, S3
XCAP-E/SMC2	Protein	P50533	condensin	Complex		Binding	Manually verified	12966087,14532007	S1, S2, S3
XCTK2	Protein	P79955	Microtubule	Complex		Binding	Manually verified	9049251	S1, S2, S3
XKCM1	Protein	Q91636	ICIS	Protein	Q7SZL5	Binding	Manually verified	12919681	S1, S2, S3
XKCM1	Protein	Q91636	Microtubule	Complex		Binding	Manually verified	8548824	S1, S2, S3
XKid	Protein	Q9I9A8	Microtubule	Complex		Binding	Manually verified	8599929	S1, S2, S3
XKLp1	Protein	Q91784	Microtubule	Complex		Binding	Manually verified	16407411	S1, S2, S3
xklp3	Protein	O93478	kinesin II	Complex		Binding	Manually verified	9852151	S1, S2, S3
xklp3	Protein	O93478	Microtubule	Complex		Binding	Manually verified	9852151	S1, S2, S3
XMAP215	Protein	Q9DDV7	cyclin B1	Protein	Q6P801	Binding	Manually verified	10640423	S1, S2, S3
XMAP215	Protein	Q9DDV7	Eb1	Protein	Q8UW77	Binding	Manually verified	17227146	S1, S2, S3
XMAP215	Protein	Q9DDV7	HURP complex	Complex		Binding	Manually verified	16631581	S1, S2, S3
XMAP215	Protein	Q9DDV7	Microtubule	Complex		Binding	Manually verified	11157747,2890645	S1, S2, S3
XMAP215	Protein	Q9DDV7	TACC3/ maskin	Protein	Q6DIN2	Binding	Manually verified	16172207	S1, S2, S3
XMAP230/ MAP4	Protein	Q9YI90	Microtubule	Complex		Binding	Manually verified	10069806	S1, S2, S3
XMAP230/ MAP4	Protein	Q9YI90	Septin	Complex		Binding	Manually verified	16093351	S1, S2, S3
xnf7	Protein	Q91431	APC	Complex		Negative regulation	Manually verified	15824132	S1, S2, S3
xnf7	Protein	Q91431	Microtubule	Complex		Binding	Manually verified	16213823	S1, S2, S3
xSpc24	Protein	Q6NRW3	NDC80	Complex		Binding	Manually verified	14738735	S1, S2, S3
14-3-3 proteins	Complex		14-3-3 beta	Protein	Q8AVQ3	Binding	Manually verified	17085597	S1, S2, S3
14-3-3 proteins	Complex		GIT/PIX	Complex		Regulation	Manually verified	16959763	S1, S2, S3
14-3-3 proteins	Complex		MARK3	Protein	Q5U5B2	Binding	Manually verified	16959763	S1, S2, S3
40S ribosomal subunit	Complex		eIF-2	Complex		Binding	Manually verified	16289913	S1, S2, S3
40S ribosomal subunit	Complex		eIF4F	Complex		Binding	Manually verified	17086181	S1, S2, S3
40S ribosomal subunit	Complex		eIF4GII	Protein	Q5KTT8	Binding	Manually verified	10922367,10970864	S1, S2, S3
40S ribosomal subunit	Complex		hG4-1	Protein	Q6GNV0	Binding	Manually verified	16631606	S1, S2, S3
40S ribosomal subunit	Complex		RACK1	Protein	Q8AVP6	Binding	Manually verified	15340087	S1, S2, S3
40S ribosomal subunit	Complex		RPS12	Protein	Q6PH94	Binding	Manually verified	8706699	S1, S2, S3
APC	Complex		APC7	Protein	Q6DDX5	Binding	Manually verified	9469815	S1, S2, S3
APC	Complex		aurora A	Protein	Q91819	Negative regulation	Manually verified	11964384	S1, S2, S3
APC	Complex		Cdt1	Protein	Q6GQH3	Negative regulation	Manually verified	15616577	S1, S2, S3
APC	Complex		cyclin B1	Protein	Q6P801	Negative regulation	Manually verified	10582242	S1, S2, S3
APC	Complex		Geminin	Protein	O93355	Negative regulation	Manually verified	9635433	S1, S2, S3
APC	Complex		TPX2	Protein	Q6NUF4	Negative regulation	Manually verified	16287863	S1, S2, S3
APC	Complex		XKid	Protein	Q9I9A8	Binding	Manually verified	11687641,10966104	S1, S2, S3
APC	Complex		xnf7	Protein	Q91431	Binding	Manually verified	15824132	S1, S2, S3
CaMKII	Complex		CAMK2Gk	Protein	Q9DG00	Binding	Manually verified	16229015	S1, S2, S3
CCR4-NOT	Complex		CNOT I	Protein	50833878(*)	Binding	Manually verified	11733989	S1, S2, S3
CCR4-NOT	Complex		CNOT2	Protein	Q5PPJ8	Binding	Manually verified	11733989	S1, S2, S3
CCR4-NOT	Complex		Microtubule	Complex		Negative regulation	Manually verified	16971515	S1, S2, S3
CCR4-NOT	Complex		RNA pol II	Complex		Negative Regulation	Manually verified	16778766	S1, S2, S3
CDK1/cyclin	Complex		aurora A	Protein	Q91819	Regulation	Manually verified	12670933	S1, S2, S3
CDK1/cyclin	Complex		CDC6	Protein	Q6IP89	Phosphorylation	Manually verified	11889049	S1, S2, S3
CDK1/cyclin	Complex		cdk1	Protein	P35567	Binding	Manually verified	2147872	S1, S2, S3
CDK1/cyclin	Complex		cyclin B1	Protein	Q6P801	Binding	Manually verified	2147872	S1, S2, S3
CDK1/cyclin	Complex		ECT2	Protein	Q5XGV4	Phosphorylation	Manually verified	16247472	S1, S2, S3
CDK1/cyclin	Complex		EF-1-beta	Protein	P30151	Phosphorylation	Manually verified	16624425,1869528	S1, S2, S3
CDK1/cyclin	Complex		Eg5	Protein	P28025	Phosphorylation	Manually verified	8548803	S1, S2, S3
CDK1/cyclin	Complex		origin recognition	Complex		Binding	Manually verified	12419251	S1, S2, S3
CDK1/cyclin	Complex		Plk1	Protein	P70032	Phosphorylation	Manually verified	7673138	S1, S2, S3
CDK1/cyclin	Complex		RANGAP1	Protein	Q7ZY43	Phosphorylation	Manually verified	15037602	S1, S2, S3
CDK1/cyclin	Complex		TACC3/ maskin	Protein	Q6DIN2	Phosphorylation	Manually verified	17086181	S1, S2, S3
CDK1/cyclin	Complex		Tubulin beta 2	Protein	P13602	Phosphorylation/Negative regulation	Manually verified	16371510	S1, S2, S3
CDK1/cyclin	Complex		Tubulin beta 3	Protein	Q6P1T8	Phosphorylation/Negative regulation	Manually verified	16371510	S1, S2, S3
CDK1/cyclin	Complex		Tubulin beta 5	Protein	P30883	Phosphorylation/Negative regulation	Manually verified	16371510	S1, S2, S3
CDK1/cyclin	Complex		XKid	Protein	Q9I9A8	Phosphorylation	Manually verified	12727876	S1, S2, S3
CDK1/cyclin	Complex		XMAP230/ MAP4	Protein	Q9YI90	Binding	Manually verified	11683421,7876309	S1, S2, S3
CDK1/cyclin	Complex		XMAP230/ MAP4	Protein	Q9YI90	Phosphorylation	Manually verified	7876309	S1, S2, S3
CDK1/cyclin	Complex		xnf7	Protein	Q91431	Phosphorylation	Manually verified	9252356	S1, S2, S3
cohesin	Complex		hSNF2H	Protein	Q6DFM0	Binding	Manually verified	12198550	S1, S2, S3
cohesin	Complex		RAD50	Protein	P70388	Binding	Manually verified	12228239	S1, S2, S3
DNA pol alpha complex	Complex		DNA primase	Complex		Binding	Manually verified	12806117,8639537	S1, S2, S3
DNA pol alpha complex	Complex		MCM3	Protein	P49739	Binding	Manually verified	11870205	S1, S2, S3
DNA pol delta	Complex		DNA pol alpha complex	Complex		Binding	Manually verified	8639537	S1, S2, S3
DNA pol delta	Complex		DNA pol delta 3	Protein	Q6DDT8	Binding	Manually verified	16000169	S1, S2, S3
DNA pol delta	Complex		DNA pol delta p50	Protein	O93610	Binding	Manually verified	10196469	S1, S2, S3
DNA pol delta	Complex		p46	Protein	Q6GPT4	Binding	Manually verified	12522211	S1, S2, S3
DNA primase	Complex		DNA pol delta	Complex		Binding	Manually verified	8639537	S1, S2, S3
DNA primase	Complex		MCM3	Protein	P49739	Binding	Manually verified	11641399	S1, S2, S3
DOCK180/ELMO	Complex		Elmo1	Protein	Q5ZL97	Binding	Manually verified	15288806	S1, S2, S3
DOCK180/ELMO	Complex		F-actin	Complex		Regulation	Manually verified	12879077	S1, S2, S3
dynactin	Complex		dynein	Complex		Binding	Manually verified	15473859	S1, S2, S3
dynein	Complex		Tubulin gamma 1	Protein	P23330	Binding	Manually verified	16261766	S1, S2, S3
eIF-2	Complex		ABC50	Protein	Q66J73	Binding	Manually verified	10931828	S1, S2, S3
exocyst	Complex		EXOC5	Protein	Q6GP79	Binding	Manually verified	12798134	S1, S2, S3
exocyst	Complex		EXOC7	Protein	O35250	Binding	Manually verified	12798134	S1, S2, S3
exon junction	Complex		SMG1	Protein	Q96Q15	Binding	Manually verified	16452507	S1, S2, S3
exon junction	Complex		spliceosome	Complex		Binding	Manually verified	17095540	S1, S2, S3
exon junction	Complex		Upf3B	Protein	Q5ZHV0	Binding	Manually verified	12093754	S1, S2, S3
F-actin	Complex		Actin beta	Protein	O93400	Binding	Manually verified	12663865	S1, S2, S3
F-actin	Complex		Actin gamma 1	Protein	P53505	Binding	Manually verified	12663865	S1, S2, S3
F-actin	Complex		Anillin	Protein	Q5XGV1	Binding	Manually verified	12479805	S1, S2, S3
F-actin	Complex		CaMKII	Complex		Binding	Manually verified	16928958	S1, S2, S3
F-actin	Complex		EF-1-alpha	Protein	P17508	Binding	Manually verified	11854414	S1, S2, S3
F-actin	Complex		MACF1	Protein	Q9UPN3	Binding	Manually verified	10601340	S1, S2, S3
F-actin	Complex		PLEC1	Protein	Q7ZWK4	Binding	Manually verified	15128297	S1, S2, S3
F-actin	Complex		RNA pol II	Complex		Binding	Manually verified	15620689	S1, S2, S3
gamma TURC	Complex		Microtubule	Complex		Binding	Manually verified	16378099	S1, S2, S3
GIT/PIX	Complex		GIT2	Protein	49116662*	Binding	Manually verified	16598076	S1, S2, S3
HURP complex	Complex		aurora A	Protein	Q91819	Binding	Manually verified	16631581	S1, S2, S3
HURP complex	Complex		HURP	Protein	Q6NVT0	Binding	Manually verified	16631581	S1, S2, S3
HURP complex	Complex		Microtubule	Complex		Binding	Manually verified	16631581	S1, S2, S3
importin	Complex		cyclin B1	Protein	Q6P801	Regulation	Manually verified	10395539	S1, S2, S3
importin	Complex		RecQ1	Protein	P46063	Binding	Manually verified	9168958	S1, S2, S3
importin	Complex		TPX2	Protein	Q6NUF4	Binding	Manually verified	14600264	S1, S2, S3
importin	Complex		TPX2	Protein	Q6NUF4	Negative Regulation	Manually verified	12861014	S1, S2, S3
importin	Complex		XCTK2	Protein	P79955	Binding	Manually verified	13679510	S1, S2, S3
importin	Complex		xnf7	Protein	Q91431	Binding	Manually verified	16213823	S1, S2, S3
katanin	Complex		Microtubule	Complex		Binding	Manually verified	8221885,9658175	S1, S2, S3
katanin	Complex		P60	Protein	Q9PUL2	Binding	Manually verified	10531065,9568719	S1, S2, S3
katanin	Complex		P80	Protein	Q7ZYI4	Binding	Manually verified	10531065,9568719,10751153	S1, S2, S3
kinesin I	Complex		dynein	Complex		Binding	Manually verified	14985359	S1, S2, S3
kinesin I	Complex		Hsc70	Protein	Q8AVE2	Binding	Manually verified	10848636	S1, S2, S3
kinesin I	Complex		KLC1	Protein	Q7ZWP7	Binding	Manually verified	12839500	S1, S2, S3
kinesin I	Complex		Microtubule	Complex		Binding	Manually verified	12925768	S1, S2, S3
kinesin II	Complex		dynactin	Complex		Binding	Manually verified	12551954	S1, S2, S3
mRNPs	Complex		Ddx6	Protein	P54824	Binding	Manually verified	11839790	S1, S2, S3
mRNPs	Complex		FRGY2A/mRNP4	Protein	P21574	Binding	Manually verified	12648488	S1, S2, S3
mSin3 co-repressor	Complex		HDAC1	Protein	Q5RAG0	Binding	Manually verified	11909966	S1, S2, S3
multi t-RNA synthetase	Complex		ArgRS	Protein	Q6P1S4	Binding	Manually verified	15286174	S1, S2, S3
multi t-RNA synthetase	Complex		EF-1-alpha	Protein	P17508	Binding	Manually verified	15286174	S1, S2, S3
multi t-RNA synthetase	Complex		MetRS	Protein	Q6AZT3	Binding	Manually verified	15286174	S1, S2, S3
multi t-RNA synthetase	Complex		p43	Protein	Q7ZWY7	Binding	Manually verified	15286174	S1, S2, S3
NDC80	Complex		zwint	Complex		Binding	Manually verified	16079178	S1, S2, S3
nuclear pore	Complex		RANGAP1	Protein	Q7ZY43	Binding	Manually verified	9456312,9822580,3336613707,2156778781	S1, S2, S3
origin recognition	Complex		ORC1	Protein	P70049	Binding	Manually verified	17066079	S1, S2, S3
origin recognition	Complex		spliceosome	Complex		Binding	Manually verified	11973290	S1, S2, S3
PheRS	Complex		EF-1-alpha	Protein	P17508	Binding	Manually verified	12354112	S1, S2, S3
PheRS	Complex		PheRS alpha	Protein	Q7SYV0	Binding	Manually verified	17003130	S1, S2, S3
PheRS	Complex		PheRS beta	Protein	Q5EBG3	Binding	Manually verified	17003130	S1, S2, S3
PI3 Kinase	Complex		CDK1/cyclin	Complex		Positive regulation	Manually verified	12242299	S1, S2, S3
PI3 Kinase	Complex		GIT/PIX	Complex		Binding	Manually verified	10523848	S1, S2, S3
PI3 Kinase	Complex		PAK-4	Protein	Q5PQ75	Positive regulation	Manually verified	12244132	S1, S2, S3
PI3 Kinase	Complex		PARP1	Protein	Q9PS81	MolTransport	Manually verified	15240138	S1, S2, S3
PI3 Kinase	Complex		PKC lambda/iota	Protein	Q5EGD6	Regulation	Manually verified	10848576,10869347,14615604,10848575	S1, S2, S3
PI3 Kinase	Complex		SMG1	Protein	Q96Q15	Binding	Manually verified	11544179	S1, S2, S3
PP1	Complex		PPP1CB	Protein	Q5I085	Binding	Manually verified	11251179	S1, S2, S3
PP2A	Complex		eEF-2	Protein	Q7ZXP8	Regulation	Manually verified	12065707,8126003,9141474	S1, S2, S3
PP2A	Complex		PPP2R1A	Protein	Q6DIG6	Binding	Manually verified	10100624	S1, S2, S3
proteasome	Complex		CDK9	Protein	Q7ZX42	Negative regulation	Manually verified	11689688	S1, S2, S3
proteasome	Complex		Cdt1	Protein	Q6GQH3	Negative regulation	Manually verified	12840033	S1, S2, S3
proteasome	Complex		cyclin B1	Protein	Q6P801	Negative regulation	Manually verified	8885231	S1, S2, S3
proteasome	Complex		p45/SUG	Protein	Q6GQB7	Binding	Manually verified	7729537	S1, S2, S3
proteasome	Complex		TBLR1	Protein	Q7SZM9	Binding	Manually verified	14980219	S1, S2, S3
proteasome	Complex		XKid	Protein	Q9I9A8	Negative regulation	Manually verified	10966104	S1, S2, S3
RFC	Complex		DNA pol alpha complex	Complex		Binding	Manually verified	8639537	S1, S2, S3
RFC	Complex		DNA pol alpha complex	Complex		Negative regulation	Manually verified	10656791	S1, S2, S3
RFC	Complex		HDAC1	Protein	Q5RAG0	Binding	Manually verified	12045192,12509469	S1, S2, S3
RFC	Complex		RFC2	Protein	Q6NRU3	Binding	Manually verified	9751713	S1, S2, S3
RFC	Complex		RFC3	Protein	Q5M830	Binding	Manually verified	12237462	S1, S2, S3
RFC	Complex		RFC5	Protein	Q7ZTM5	Binding	Manually verified	9315648	S1, S2, S3
RNA pol II	Complex		Integrator	Complex		Binding	Manually verified	16239144	S1, S2, S3
RNA pol II	Complex		NELF	Complex		Binding	Manually verified	10199401	S1, S2, S3
RNA pol II	Complex		RPB2	Protein	Q8CFI7	Binding	Manually verified	11168400	S1, S2, S3
RNA pol II	Complex		RPB3	Protein	Q6IRR3	Binding	Manually verified	11168400	S1, S2, S3
RNA-transporting granule	Complex		CGI-99	Protein	Q5M9B0	Binding	Manually verified	15312650	S1, S2, S3
RNA-transporting granule	Complex		EF-1-alpha	Protein	P17508	Binding	Manually verified	15312650	S1, S2, S3
RNA-transporting granule	Complex		KIF5B	Protein	P33176	Binding	Manually verified	15312650	S1, S2, S3
RNA-transporting granule	Complex		RNF86	Protein	Q6GM89	Binding	Manually verified	15312650	S1, S2, S3
S100A8/ S100A9	Complex		Microtubule	Complex		Binding	Manually verified	15331440,9083090	S1, S2, S3
Septin	Complex		exocyst	Complex		Binding	Manually verified	10744683	S1, S2, S3
SWI/SNF	Complex		hSNF2H	Protein	Q6DFM0	Binding	Manually verified	10688638	S1, S2, S3
THO/TREX	Complex		mRNPs	Complex		Binding	Manually verified	17095540	S1, S2, S3
THO/TREX	Complex		Nif3l1bp1/ THOC7	Protein	Q7SZ78	Binding	Manually verified	15133499	S1, S2, S3
THO/TREX	Complex		nuclear pore	Complex		Binding	Manually verified	12411502	S1, S2, S3
THO/TREX	Complex		spliceosome	Complex		Binding	Manually verified	12226669	S1, S2, S3
tubulin dimer	Complex		Microtubule	Complex		Binding	Manually verified	9442869	S1, S2, S3
zwint	Complex		CLIP170	Protein	Q63ZU6	Binding	Manually verified	16079178	S1, S2, S3
zwint	Complex		dynein	Complex		Binding	Manually verified	16079178	S1, S2, S3
zwint	Complex		p150 glued	Protein	Q6PCJ1	Binding	Manually verified	16079178	S1, S2, S3
14-3-3 beta	Protein	Q8AVQ3	CAMK2 delta12	Protein	Q9DG02		NetPro	12619878	S2, S3
Actin beta	Protein	O93400	EF-1-alpha	Protein	P17508	|in vivo	DIP|HPRD	11290701|11854414	S2, S3
Actin beta	Protein	O93400	Grp78	Protein	Q8AVE3	cosedimentation through density gradients	MINT	17174955	S2, S3
Actin beta	Protein	O93400	MACF1	Protein	Q9UPN3	in vitro;in vivo	HPRD	10601340,10559237,1074709	S2, S3
Actin beta	Protein	O93400	FRGY2A/mRNP4	Protein	P21574		BIND	10504297	S2, S3
Actin beta	Protein	O93400	UBC	Protein	Q7SY79	affinity chromatography technologies	MINT	15699485	S2, S3
Actin gamma 1	Protein	P53505	PLEC1	Protein	Q7ZWK4	in vitro	HPRD	9808630	S2, S3
ALDOA	Protein	O12975	cyclophilin B	Protein	Q7SZ26	affinity chrom	IntAct	15627969	S2, S3
ALDOA	Protein	O12975	RACK1	Protein	Q8AVP6	affinity chrom	IntAct	15627969	S2, S3
ALDOA	Protein	O12975	Tubulin beta 2	Protein	P13602	in vitro	HPRD	8103323	S2, S3
ALDOA	Protein	O12975	Tubulin beta 3	Protein	Q6P1T8	in vitro	HPRD	8103323	S2, S3
ALDOA	Protein	O12975	Tubulin beta 5	Protein	P30883	in vitro	HPRD	8103323	S2, S3
Beta-Pix	Protein	Q6XPA5	GIT1	Protein	Q9DG15	in vitro;in vivo;yeast 2-hybrid|anti bait coimmunoprecipitation	HPRD|MINT	10896954|16628223	S2, S3
cdk1	Protein	P35567	ECT2	Protein	Q5XGV4	in vitro	HPRD	16247472	S2, S3
cdk1	Protein	P35567	Peroxiredoxin-4	Protein	Q5PPT1		NetPro	11986303	S2, S3
cdk1	Protein	P35567	PLEC1	Protein	Q7ZWK4	in vitro;in vivo|Mutation analysis	HPRD|NetPro	8626512|8626512	S2, S3
cdk1	Protein	P35567	PPP1CB	Protein	Q5I085	Fluorescence microscopy	NetPro	9122166	S2, S3
CDK8	Protein	Q6P3N6	CRSP3	Protein	Q6P423	ion exchange chrom	IntAct	15175163	S2, S3
CKI-alpha	Protein	O19175	Actin beta	Protein	O93400	in vitro	HPRD	12062430	S2, S3
CKI-alpha	Protein	O19175	Beta3A-adaptin	Protein	Q6DJL1	in vitro;in vivo	HPRD	12062430	S2, S3
CLASP1	Protein	Q7Z460	Eb1	Protein	Q8UW77	immunoprecipitation|in vitro;in vivo	BIND|HPRD	15631994|15631994	S2, S3
Dnaja2	Protein	Q6GLD0	Hsc70	Protein	Q8AVE2	Immunostaining/Cytochemical staining	NetPro	10816573	S2, S3
DOCK180	Protein	Q5VXF6	Elmo1	Protein	Q5ZL97	immunoprecipitation|in vitro;in vivo|anti tag coip|anti tag coimmunoprecipitation|	BIND|HPRD|IntAct|MINT|NetPro	12134158|12134158|12134158,15247908|12134158|12134158	S2, S3
EF-1-alpha	Protein	P17508	AspRS	Protein	Q8AVK0	in vitro	HPRD	7806521	S2, S3
eIF-4-gamma 1	Protein	Q04637	hUpf2	Protein	Q9HAU5	in vivo|coip	HPRD|IntAct	15361857|15361857	S2, S3
Glut/Prol RS	Protein	P07814	IleRS	Protein	Q6P284	in vitro;yeast 2-hybrid|two hybrid	HPRD|MINT	9556618,10913161|10913161	S2, S3
Grp78	Protein	Q8AVE3	CA150	Protein	Q8CGF7	in vitro	HPRD	15456888	S2, S3
GRP94	Protein	Q7ZTB3	GRP75	Protein	Q7ZX77	in vitro;in vivo	HPRD	12470827	S2, S3
HDAC1	Protein	Q5RAG0	HDAC2	Protein	Q7ZYT5	coimmunoprecipitation	MINT	11287668	S2, S3
HDAC1	Protein	Q5RAG0	TOPOII	Protein	Q6INT0	in vitro;in vivo|two hybrid|	HPRD|MINT|NetPro	11136718|11136718|11136718	S2, S3
HDAC1	Protein	Q5RAG0	MTA2	Protein	Q9PUN0	anti tag coip	IntAct	14645126	S2, S3
HDAC1	Protein	Q5RAG0	RFC4	Protein	Q76LD2	in vitro	HPRD	12045192	S2, S3
HDAC1	Protein	Q5RAG0	UBC	Protein	Q7SY79	anti bait coimmunoprecipitation	MINT	16374504	S2, S3
HDAC2	Protein	Q7ZYT5	ATR	Protein	Q9DE14	Immunoprecipitation	NetPro	10545197	S2, S3
HDAC2	Protein	Q7ZYT5	hSNF2H	Protein	Q9DF71	immunoprecipitation|in vivo	BIND|HPRD	15775975|15775975	S2, S3
hG4-1	Protein	Q6GNV0	HDAC2	Protein	Q7ZYT5	affinity-chromatography|in vitro|two hybrid	BIND|HPRD|IntAct	12682367|12682367|12682367	S2, S3
hNuf2	Protein	Q8AWF4	KNTC2/ Hec1	Protein	Q8AWF5	anti bait coip	IntAct	12514103,14738735	S2, S3
Hsc70	Protein	Q8AVE2	CA150	Protein	Q8CGF7	in vitro	HPRD	15456888	S2, S3
Hsc70	Protein	Q8AVE2	Dnaja1-prov (HSP40)	Protein	Q8AVG6	in vivo|Fluorescence microscopy	HPRD|NetPro	10075921|10816573	S2, S3
hSNF2H	Protein	Q6DFM0	HDAC2	Protein	Q7ZYT5	immunoprecipitation|in vivo	BIND|HPRD	15775975|15775975	S2, S3
hUpf1	Protein	Q6GNR2	hUpf2	Protein	Q9HAU5	immunoprecipitation|in vitro;in vivo;yeast 2-hybrid|anti tag coip	BIND|HPRD|IntAct	15680326|11073994,12723973|15680326,12417715	S2, S3
hUpf1	Protein	Q6GNR2	SMG1	Protein	Q96Q15	in vivo|	HPRD|NetPro	11544179,11331269|14636577	S2, S3
MCM3	Protein	P49739	CDC6	Protein	Q6IP89	cosedimentation	IntAct	9635433	S2, S3
MCM3	Protein	P49739	ORC2	Protein	Q5XGS9	cosedimentation	IntAct	9635433	S2, S3
MCM5	Protein	P55862	Orc5	Protein	Q9WUV0	in vitro|protein array	HPRD|IntAct	15232106|15232106	S2, S3
NEDD5	Protein	Q5R626	Septin-7	Protein	Q6GLZ5	not-specified	BIND	11739749	S2, S3
NEDD5	Protein	Q5R626	Septin-9	Protein	Q9UHD8	in vivo	HPRD	12388755	S2, S3
NELF-A	Protein	Q66IR5	NELF-C/D	Protein	Q8IXH7	in vitro	HPRD	12612062	S2, S3
p150 glued	Protein	Q6PCJ1	DH IC-2	Protein	Q98SV2	in vitro	HPRD	8522607	S2, S3
p150 glued	Protein	Q6PCJ1	Eb1	Protein	Q8UW77	in vitro	HPRD	12388762	S2, S3
p150 glued	Protein	Q6PCJ1	LIS1	Protein	Q90ZL4	in vivo	HPRD	14584027,11889140	S2, S3
PKC lambda/iota	Protein	Q5EGD6	SMG1	Protein	Q96Q15	in vitro;yeast 2-hybrid|	HPRD|NetPro	8524286|8524286	S2, S3
PLEC1	Protein	Q7ZWK4	RACK1	Protein	Q8AVP6	in vitro;yeast 2-hybrid	HPRD	14966116	S2, S3
RBBP-4	Protein	O93377	HDAC1	Protein	Q5RAG0	immunoprecipitation|in vitro;in vivo|anti tag coip	BIND|HPRD|IntAct	10734134|15451426,10734134,12943729,12091390,11302704|9150135	S2, S3
RBBP-4	Protein	O93377	MTA2	Protein	Q9PUN0	in vivo|anti tag coip	HPRD|IntAct	14645126|14645126	S2, S3
RFC2	Protein	Q6NRU3	RFC4	Protein	Q76LD2	in vitro;in vivo;yeast 2-hybrid|coip|	HPRD|IntAct|NetPro	9488738,8692848,9228079|15655353,9488738|8093561	S2, S3
RFC2	Protein	Q6NRU3	RFC5	Protein	Q7ZTM5	in vitro;in vivo;yeast 2-hybrid|solution sedimentati	HPRD|IntAct	9488738,8692848,9228079|9488738	S2, S3
RFC3	Protein	Q5M830	RFC2	Protein	Q6NRU3	solution sedimentati	IntAct	9488738	S2, S3
RFC3	Protein	Q5M830	RFC4	Protein	Q76LD2	in vitro;in vivo|pull down	HPRD|IntAct	9488738,8692848|9488738	S2, S3
RFC4	Protein	Q76LD2	RFC5	Protein	Q7ZTM5	in vitro;in vivo;yeast 2-hybrid|two hybrid pooling	HPRD|IntAct	9488738,8692848,9228079|16189514,9488738	S2, S3
RHAMM	Protein	Q643Y9	TPX2	Protein	Q6NUF4	anti bait coip	IntAct	17081976	S2, S3
RNF86	Protein	Q6GM89	TNIK	Protein	Q6GP94	two hybrid	IntAct	17043677	S2, S3
RPB3	Protein	Q6IRR3	RPB2	Protein	Q8CFI7	affinity-chromatography|in vitro	BIND|HPRD	9201987|9201987	S2, S3
S100A8	Protein	P05109	S100A9	Protein	P06702	|in vivo|	DIP|HPRD|NetPro	10606357|11867565|1378023	S2, S3
Septin-7	Protein	Q6GLZ5	Septin-9	Protein	Q9UHD8	in vitro;in vivo	HPRD	12388755,15485874	S2, S3
SMC1	Protein	O93308	SMC3	Protein	Q8AW91	in vivo|anti bait coip	HPRD|IntAct	9789013,11076961|17113138	S2, S3
SMG1	Protein	Q96Q15	hUpf2	Protein	Q9HAU5	in vivo	HPRD	11544179	S2, S3
Tubulin Alpha 1	Protein	Q6DD58	LIS1	Protein	Q90ZL4	in vitro	HPRD	9384577	S2, S3
Tubulin beta 2	Protein	P13602	RACK1	Protein	Q8AVP6	in vitro;in vivo	HPRD	12884273	S2, S3
Tubulin beta 2	Protein	P13602	Tubulin Alpha 1	Protein	Q6DD58	other|in vitro|experimental interac	BIND|HPRD|IntAct	15959508|15121898|unassigned4	S2, S3
Tubulin beta 2	Protein	P13602	Tubulin gamma 1	Protein	P23330	in vitro	HPRD	14594945	S2, S3
Tubulin beta 3	Protein	Q6P1T8	RACK1	Protein	Q8AVP6	in vitro;in vivo	HPRD	12884273	S2, S3
Tubulin beta 5	Protein	P30883	RACK1	Protein	Q8AVP6	in vitro;in vivo	HPRD	12884273	S2, S3
Tubulin beta 5	Protein	P30883	Tubulin Alpha 1	Protein	Q6DD58	other|in vitro	BIND|HPRD	15959508|15121898	S2, S3
Tubulin gamma 1	Protein	P23330	Tubulin Alpha 1	Protein	Q6DD58	in vitro	HPRD	11082048	S2, S3
Tubulin gamma 1	Protein	P23330	Tubulin beta 3	Protein	Q6P1T8	in vitro	HPRD	14594945	S2, S3
Tubulin gamma 1	Protein	P23330	Tubulin beta 5	Protein	P30883	in vitro	HPRD	14594945	S2, S3
xSpc24	Protein	Q6NRW3	hNuf2	Protein	Q8AWF4	anti bait coip	IntAct	14738735	S2, S3
14-3-3 beta	Protein	Q8AVQ3	60S RP L5	Protein	Q8AVX2	density sedimentatio	IntAct	16236029	S3	+
14-3-3 beta	Protein	Q8AVQ3	DH IC-2	Protein	Q98SV2	density sedimentatio	IntAct	16236029	S3	+
14-3-3 beta	Protein	Q8AVQ3	ERC1	Protein	Q8IUD2	density sedimentatio	IntAct	16236029	S3	+
14-3-3 beta	Protein	Q8AVQ3	GIT1	Protein	Q9DG15	density sedimentatio	IntAct	16236029	S3	+
14-3-3 beta	Protein	Q8AVQ3	Septin-9	Protein	Q9UHD8	density sedimentatio	IntAct	16236029	S3	+
60S RP L5	Protein	Q8AVX2	hUpf2	Protein	Q9HAU5	two-hybrid-test|yeast 2-hybrid|two hybrid	BIND|HPRD|IntAct	15231747|15231747|15231747	S3	+
Actin beta	Protein	O93400	14-3-3 beta	Protein	Q8AVQ3	density sedimentatio	IntAct	16236029	S3	+
Actin beta	Protein	O93400	Actin gamma 1	Protein	P53505	yeast 2-hybrid	HPRD	16189514	S3	+
Actin beta	Protein	O93400	EF-1-beta	Protein	P30151	molecular sieving	IntAct	15047060	S3	+
Actin beta	Protein	O93400	Hsc70	Protein	Q8AVE2	molecular sieving	IntAct	15047060	S3	+
Actin beta	Protein	O93400	p40	Protein	Q7ZX07	molecular sieving	IntAct	15047060	S3	+
Actin beta	Protein	O93400	PheRS beta	Protein	Q5EBG3	molecular sieving	IntAct	15047060	S3	+
Actin beta	Protein	O93400	RACK1	Protein	Q8AVP6	molecular sieving	IntAct	15047060	S3	+
Actin beta	Protein	O93400	RPS12	Protein	Q6PH94	molecular sieving	IntAct	15047060	S3	+
Actin beta	Protein	O93400	Tubulin Alpha 1	Protein	Q6DD58	molecular sieving	IntAct	15047060	S3	+
Actin beta	Protein	O93400	Tubulin beta 2	Protein	P13602	molecular sieving	IntAct	15047060	S3	+
Actin beta	Protein	O93400	Tubulin beta 3	Protein	Q6P1T8	molecular sieving	IntAct	15047060	S3	+
Actin beta	Protein	O93400	Tubulin beta 5	Protein	P30883	molecular sieving	IntAct	15047060	S3	+
Actin beta	Protein	O93400	UBC	Protein	Q7SY79	molecular sieving	IntAct	15047060	S3	+
ALDOA	Protein	O12975	14-3-3 beta	Protein	Q8AVQ3	density sedimentatio	IntAct	16236029	S3	+
AP-3 mu-2	Protein	Q5PPX3	14-3-3 beta	Protein	Q8AVQ3	density sedimentatio	IntAct	16236029	S3	+
Beta-Pix	Protein	Q6XPA5	14-3-3 beta	Protein	Q8AVQ3	density sedimentatio	IntAct	16236029	S3	+
Citron-K	Protein	P49025	14-3-3 beta	Protein	Q8AVQ3	density sedimentatio	IntAct	16236029	S3	+
CKI-alpha	Protein	O19175	14-3-3 beta	Protein	Q8AVQ3	density sedimentatio	IntAct	16236029	S3	+
DDX1	Protein	Q5XH91	14-3-3 beta	Protein	Q8AVQ3	density sedimentatio	IntAct	16236029	S3	+
Dnaja1-prov (HSP40)	Protein	Q8AVG6	14-3-3 beta	Protein	Q8AVQ3	density sedimentatio	IntAct	16236029	S3	+
Dnaja1-prov (HSP40)	Protein	Q8AVG6	NELF-C/D	Protein	Q8IXH7	two hybrid pooling|two hybrid	IntAct|MINT	16169070|16169070	S3	+
Dnaja2	Protein	Q6GLD0	14-3-3 beta	Protein	Q8AVQ3	density sedimentatio	IntAct	16236029	S3	+
DOCK7	Protein	Q5T1C0	14-3-3 beta	Protein	Q8AVQ3	density sedimentatio	IntAct	16236029	S3	+
DYHC	Protein	P38650	14-3-3 beta	Protein	Q8AVQ3	density sedimentatio	IntAct	16236029	S3	+
eEF-2	Protein	Q7ZXP8	14-3-3 beta	Protein	Q8AVQ3	density sedimentatio	IntAct	16236029	S3	+
EF-1-alpha	Protein	P17508	14-3-3 beta	Protein	Q8AVQ3	density sedimentatio	IntAct	16236029	S3	+
EF-1-alpha	Protein	P17508	EF-1-beta	Protein	P30151	anti bait coip	IntAct	17353931	S3	+
EF-1-alpha	Protein	P17508	RFC5	Protein	Q7ZTM5	yeast 2-hybrid|two hybrid pooling|two hybrid	HPRD|IntAct|MINT	16169070|16169070|16169070	S3	+
EF-1-alpha	Protein	P17508	RPB3	Protein	Q6IRR3	yeast 2-hybrid|two hybrid pooling|two hybrid	HPRD|IntAct|MINT	16169070|16169070|16169070	S3	+
EF-1-beta	Protein	P30151	14-3-3 beta	Protein	Q8AVQ3	density sedimentatio	IntAct	16236029	S3	+
EXOC3	Protein	Q6DJR6	14-3-3 beta	Protein	Q8AVQ3	density sedimentatio	IntAct	16236029	S3	+
EXOC5	Protein	Q6GP79	14-3-3 beta	Protein	Q8AVQ3	density sedimentatio	IntAct	16236029	S3	+
EXOC7	Protein	O35250	14-3-3 beta	Protein	Q8AVQ3	density sedimentatio	IntAct	16236029	S3	+
Glut/Prol RS	Protein	P07814	NELF-C/D	Protein	Q8IXH7	two hybrid pooling|two hybrid	IntAct|MINT	16169070|16169070	S3	+
GRP75	Protein	Q7ZX77	14-3-3 beta	Protein	Q8AVQ3	density sedimentatio	IntAct	16236029	S3	+
Grp78	Protein	Q8AVE3	14-3-3 beta	Protein	Q8AVQ3	in vivo|density sedimentatio|coimmunoprecipitation	HPRD|IntAct|MINT	15324660|16236029|15324660	S3	+
GRP94	Protein	Q7ZTB3	14-3-3 beta	Protein	Q8AVQ3	density sedimentatio	IntAct	16236029	S3	+
HADHB	Protein	Q7ZTL0	14-3-3 beta	Protein	Q8AVQ3	density sedimentatio	IntAct	16236029	S3	+
KIF5B	Protein	P33176	14-3-3 beta	Protein	Q8AVQ3	in vivo|anti bait coip|coimmunoprecipitation	HPRD|IntAct|MINT	15324660|17353931|15324660	S3	+
KLC1	Protein	Q7ZWP7	14-3-3 beta	Protein	Q8AVQ3	in vivo|coimmunoprecipitation	HPRD|MINT	15324660|15324660	S3	+
LysRS	Protein	Q7ZWY9	LIS1	Protein	Q90ZL4	two hybrid pooling	IntAct	16169070	S3	+
MARK3	Protein	Q5U5B2	14-3-3 beta	Protein	Q8AVQ3	coimmunoprecipitation	MINT	15324660	S3	+
MDH2	Protein	Q6GR58	14-3-3 beta	Protein	Q8AVQ3	density sedimentatio	IntAct	16236029	S3	+
MINK1	Protein	Q6DDZ8	14-3-3 beta	Protein	Q8AVQ3	density sedimentatio	IntAct	16236029	S3	+
M-RIP	Protein	P97434	14-3-3 beta	Protein	Q8AVQ3	in vivo|coimmunoprecipitation	HPRD|MINT	15324660|15324660	S3	+
NEDD5	Protein	Q5R626	14-3-3 beta	Protein	Q8AVQ3	density sedimentatio	IntAct	16236029	S3	+
Neurofibromin	Protein	Q5SYI1	14-3-3 beta	Protein	Q8AVQ3	density sedimentatio	IntAct	16236029	S3	+
PLEC1	Protein	Q7ZWK4	14-3-3 beta	Protein	Q8AVQ3	density sedimentatio	IntAct	16236029	S3	+
PPP1CB	Protein	Q5I085	14-3-3 beta	Protein	Q8AVQ3	density sedimentatio	IntAct	16236029	S3	+
PPP1CB	Protein	Q5I085	HDAC1	Protein	Q5RAG0	antibody array	IntAct	17274640	S3	+
PPP1CB	Protein	Q5I085	skp1	Protein	Q71U00	anti bait coip	IntAct	17274640	S3	+
PPP2R1A	Protein	Q6DIG6	14-3-3 beta	Protein	Q8AVQ3	density sedimentatio	IntAct	16236029	S3	+
PPP2R1A	Protein	Q6DIG6	TNIK	Protein	Q6GP94	anti bait coip	IntAct	17353931	S3	+
RFC4	Protein	Q76LD2	RFC5	Protein	Q7ZTM5	two hybrid	MINT	16189514	S3	+
S100A8	Protein	P05109	Tubulin Alpha 1	Protein	Q6DD58	two hybrid pooling	IntAct	16169070	S3	+
Septin-7	Protein	Q6GLZ5	14-3-3 beta	Protein	Q8AVQ3	density sedimentatio	IntAct	16236029	S3	+
SORD	Protein	Q6DJH7	TNIK	Protein	Q6GP94	anti bait coip	IntAct	17353931	S3	+
Tubulin Alpha 1	Protein	Q6DD58	14-3-3 beta	Protein	Q8AVQ3	density sedimentatio	IntAct	16236029	S3	+
Tubulin beta 2	Protein	P13602	14-3-3 beta	Protein	Q8AVQ3	in vivo|coimmunoprecipitation	HPRD|MINT	15324660|15324660	S3	+
Tubulin beta 2	Protein	P13602	Beta-Pix	Protein	Q6XPA5	two hybrid pooling|two hybrid	IntAct|MINT	16169070|16169070	S3	+
Tubulin beta 3	Protein	Q6P1T8	14-3-3 beta	Protein	Q8AVQ3	in vivo|coimmunoprecipitation	HPRD|MINT	15324660|15324660	S3	+
Tubulin beta 3	Protein	Q6P1T8	Beta-Pix	Protein	Q6XPA5	two hybrid	MINT	16169070	S3	+
Tubulin beta 5	Protein	P30883	14-3-3 beta	Protein	Q8AVQ3	in vivo|coimmunoprecipitation	HPRD|MINT	15324660|15324660	S3	+
Tubulin beta 5	Protein	P30883	Beta-Pix	Protein	Q6XPA5	two hybrid pooling|two hybrid	IntAct|MINT	16169070|16169070	S3	+
UBC	Protein	Q7SY79	14-3-3 beta	Protein	Q8AVQ3	in vivo|density sedimentatio|coimmunoprecipitation	HPRD|IntAct|MINT	15324660|16236029|15324660	S3	+
UBC	Protein	Q7SY79	Hsc70	Protein	Q8AVE2	yeast 2-hybrid|two hybrid pooling|two hybrid	HPRD|IntAct|MINT	16169070|16169070|16169070	S3	+
